# Supplementary material for: Addressable DNA nanotubes with repetitive components
Source: Royal Society of Chemistry journal article supplement (doi:10.1039/c9nr07196b), 2019-01-01
Supplement: c9nr07196b2.pdf [file c9nr07196b2.pdf]

## Supplementary Information 2

### **Addressable DNA nanotubes with repetitive components**

Tanxi Bai, Bryan Wei\*

School of Life Sciences, Tsinghua University-Peking University Center for Life Sciences, Center for Synthetic and Systems Biology, Tsinghua University, Beijing 100084, China

\*Correspondences and requests for materials should be addressed to B.W. (email: [bw@tsinghua.edu.cn](mailto:bw@tsinghua.edu.cn))

Sequences for structures from different addressable rows of U-SSTs are given in work sheets named U-SSTs-24H, -12H, -6H, etc.

Sequences for structures from different addressable rows of U2-SSTs are given in work sheets named U2-SSTs-12H, -8H, -6H, etc.

A similar denotation is adapted from the previous study<sup>1</sup> and applicable for all the structures. The location of a strand denotes the row and column numbers in the structure. For example, a location named x-y indicates that it is in row x and column y.

For gold nanoparticle decoration, two strands with 3' thiol modification are named U-SSTs-2H-100Column-100 and U-SSTs-2H-100Column-101 respectively in the work sheet U-SSTs-2Hx100C.

1 Wei, B. *et al.* Design Space for Complex DNA Structures. *J. Am. Chem. Soc.* **135**, 18080 (2013).

**U-SSTs-24H**

| <b>Seq_ID</b> | <b>Location</b> | <b>Sequence</b>                              |
|---------------|-----------------|----------------------------------------------|
| U-SSTs-24H-1  | 1-1             | TGGGCTCGTGATGACACCGCCGATCCGCTGGGCTTGTCACC    |
| U-SSTs-24H-2  | 1-2             | AGTTATGCGGGCTTAATGACAGGTCTAAACTTGCCAATTTCA   |
| U-SSTs-24H-3  | 1-3             | GGCCTGACCGCCCTACGTTTGGGGAGGTCATTCCTTCATCCC   |
| U-SSTs-24H-4  | 1-4             | TGCTCGAGGTCACCTTCTCAATTGACCACGATCGGCAGAGTC   |
| U-SSTs-24H-5  | 1-5             | CTGATTCTCCAAGCGAATAACCATCTGGCCAATCTAGCCAA    |
| U-SSTs-24H-6  | 1-6             | CGACTCTAACTACATCTCAGATAGGTAGAGAAAGGGCTCAGA   |
| U-SSTs-24H-7  | 1-7             | GACCCGCTCCCCAGAGTCGTTAACATGATACCATGGGGTCC    |
| U-SSTs-24H-8  | 1-8             | TCAAAAATTTCTATCTACAATGGATGGAGCAGCCGGCCAGCC   |
| U-SSTs-24H-9  | 1-9             | TCAAGCATAGACTGAAGCCCTTCTGTGCGCGCCGGTGCGCA    |
| U-SSTs-24H-10 | 1-10            | CATGACCAAGAAGAGCCCAGTCACACACAGTGCCCATTTACC   |
| U-SSTs-24H-11 | 1-11            | TGGGCGGTGCTTGTCTATGCATACGGCCCGATGGTTAGAGAT   |
| U-SSTs-24H-12 | 1-12            | TTTATTGCTCCTCACGACACAATTAATCGGTTTCATCGTTAA   |
| U-SSTs-24H-13 | 1-13            | CGCCTTGGGAAACATCAGGGATCAGTAAAAGCACAAAATCC    |
| U-SSTs-24H-14 | 1-14            | GGATTTGGAGTACTTCTTCAGTACGGTTTTCGCCAGTAACTA   |
| U-SSTs-24H-15 | 2-1             | TTTTTTTTTTTGCACATAGCATCACGAGGCCATTTTTTTTTT   |
| U-SSTs-24H-16 | 2-2             | TTCAAAGACCATTTTCGTGTGACCCGCATAACTGCGGTGTCAT  |
| U-SSTs-24H-17 | 2-3             | GCCACCACTCTGAACCTCGTATGCGGTCAGGCCTGTCATTAAG  |
| U-SSTs-24H-18 | 2-4             | GGACTCGTGTCAAACTCGAGGACCTCGAGCACAAACGTAGG    |
| U-SSTs-24H-19 | 2-5             | TAAGTCGCGTCTGACAGACACGGAGGAATCAGTTGAGAAGGT   |
| U-SSTs-24H-20 | 2-6             | TGATCATCGGTAACACGAACTAGTTAGAGTCGTTATTCGCTT   |
| U-SSTs-24H-21 | 2-7             | GTATCTAGACGTCCGCAACCAGGGAGCGGGTCTCTGAGATGT   |
| U-SSTs-24H-22 | 2-8             | CGGAGGTAGCGTACTATCAGAGAATTTTTGAACGACTCTGG    |
| U-SSTs-24H-23 | 2-9             | TCGTTCTGTGCCGCACGTTGTTCTATGCTTGACATTGTAGAT   |
| U-SSTs-24H-24 | 2-10            | CCGCTAATGTTGAGACTGCTCTCTTGGTCATGAGGGCTTCAG   |
| U-SSTs-24H-25 | 2-11            | AAAGGATGGGGATAAGCCAGAAGCACCGCCCAACTGGGCTCT   |
| U-SSTs-24H-26 | 2-12            | CGACCCATTCCGCGGTCCGCGGAGCAATAAATGCATAGACA    |
| U-SSTs-24H-27 | 2-13            | CAGGCTCCTAGGTCCGCTTCTTTCCCAAGGCGTGTGTCGTGA   |
| U-SSTs-24H-28 | 2-14            | TCCGAAAGTGGAATGGGTAGAACTCCAAATCCTCCCTGATGT   |
| U-SSTs-24H-29 | 2-15            | CATGGATATTTTTTTTTTTTTTTTTTTTTTTTTTCTGAAGAAGT |
| U-SSTs-24H-30 | 3-1             | TAGGCTTCTCGACCTCAGCCTGGTCTTTGAAATGCTATGTGC   |
| U-SSTs-24H-31 | 3-2             | CCTTTTGGTGAAGTCTCACCTGAGTGGTGGCTCACACGAAAT   |
| U-SSTs-24H-32 | 3-3             | CAGTAAATTTAGGCCTAATGTACACGAGTCCATACGAGTTCA   |
| U-SSTs-24H-33 | 3-4             | ATGTCGCGACACAAAAGACCGACGCGACTTACTCGAGTTTTG   |
| U-SSTs-24H-34 | 3-5             | AGGGGTATGGCGCACTTGTGCCGATGATCAGTGTCTGTCAG    |
| U-SSTs-24H-35 | 3-6             | CAAAGAACTACGCCCTAAGCAGTCTAGATACAGTTCGTGTTA   |
| U-SSTs-24H-36 | 3-7             | AAGGATTGAAACAGCACCAAGTGCTACCTCCGTGGTTGCGGAC  |
| U-SSTs-24H-37 | 3-8             | CGCGGTCCGCCGCATCCAAACCACAGAACGACTGATAGTAGC   |
| U-SSTs-24H-38 | 3-9             | AAATATATTTTAAGTGGTAGGACATTAGCGGACAACGTGCGG   |
| U-SSTs-24H-39 | 3-10            | AAACCCAGGAATACTGCACACCCCATCCTTTGAGCAGTCTCA   |
| U-SSTs-24H-40 | 3-11            | ACCATCGCTAAGGGGATCGCCGAATGGGTGCTCTGGCTTATC   |
| U-SSTs-24H-41 | 3-12            | TCCATCGAAAATATCCTAATCTAGGAGCCTGGCGCGACCGCG   |
| U-SSTs-24H-42 | 3-13            | CGTCCCGAACAGAATACAAATCACTTTCGGAAGAAGCGGACC   |
| U-SSTs-24H-43 | 3-14            | CTCCCCTTCCAGTGCGCGATGAATATCCATGTCTACCCATTC   |
| U-SSTs-24H-44 | 4-1             | TTTTTTTTTTTGGCCGATTAGCCGAGAAGCCTATTTTTTTTTT  |
| U-SSTs-24H-45 | 4-2             | TCCCCTTCCACCCGACGTGCCTCACCAAAGGGAGGCTGAGGT   |
| U-SSTs-24H-46 | 4-3             | ACCTTGGTGAAGGCGCGGTATAAATTTACTGAGGTGAGACT    |

| <b>Seq_ID</b> | <b>Location</b> | <b>Sequence</b>                              |
|---------------|-----------------|----------------------------------------------|
| U-SSTs-24H-47 | 4-4             | CGGGAAGTACGCTGACCCCTTTTGTGCGGACATACATTAGGCC  |
| U-SSTs-24H-48 | 4-5             | GATAGGGCAATGAGCTGGGAACCATAACCCCTCGGTCTTTTG   |
| U-SSTs-24H-49 | 4-6             | ATCCTATACTTACGCCAATGAGTAGTTCTTTGCACAAGTGCG   |
| U-SSTs-24H-50 | 4-7             | GCTGGCAATGGGGATTGCCAATTTCAATCCTTTGCTTAGGGC   |
| U-SSTs-24H-51 | 4-8             | GACCTTATATAGATTAACCGGGGCGGACCGCGACTGGTGCTG   |
| U-SSTs-24H-52 | 4-9             | CTCATAATTTTCAAGCCCAAGAAAATATATTTGTTGGATGC    |
| U-SSTs-24H-53 | 4-10            | CAGGCAGTACAAATCGGGGCATTCTGGGTTTCTTACCCTT     |
| U-SSTs-24H-54 | 4-11            | AGAATAAATTGATATGACTCGTTAGCGATGGTGTGTGCAGTA   |
| U-SSTs-24H-55 | 4-12            | GTTAATGCACTGTAGATTTTTTTTTTTCGATGGAGGCGATCCCC |
| U-SSTs-24H-56 | 4-13            | CGTGCAGAAATGCGCCTCCCCCTGTTTCGGGACGGATTAGGATA |
| U-SSTs-24H-57 | 4-14            | GCTGGGGGTGTCAGAGGGCCCTGGAAGGGGAGATTTGTATTC   |
| U-SSTs-24H-58 | 4-15            | GAGTAAACTATTTTTTTTTTTTTTTTTTTTTTTCATCGCGCAC  |
| U-SSTs-24H-59 | 5-1             | TTATCGTTGAGGATACCTCTTTGGAAGGGGAGCTAATCGGCC   |
| U-SSTs-24H-60 | 5-2             | ATTCCGGCCGACCCGTACAGCCACCAAGGTGGCACGTCGGG    |
| U-SSTs-24H-61 | 5-3             | CAAGCCCAGCGGTAAGACAACCTAGTTCCCGTACGCCGCCTT   |
| U-SSTs-24H-62 | 5-4             | CCTACCCTATTTTTTAGACTATTGCCCTATCAAAGGGTCACG   |
| U-SSTs-24H-63 | 5-5             | TCGGCGCGGACCTCGAGTCAAGTATAGGATTTCCAGCTCA     |
| U-SSTs-24H-64 | 5-6             | AGAACTCTGGCCCAAACAGTACATTGCCAGCTCATTGGCGTA   |
| U-SSTs-24H-65 | 5-7             | TCTATCAGTCTTCCGCGATCCATATAAGGTCTTGGCAATCCC   |
| U-SSTs-24H-66 | 5-8             | ATAGGACAGCATCAGTCTCCTAAATTATGAGCCGGTTAATCT   |
| U-SSTs-24H-67 | 5-9             | ACTAGTGCGGGCTTGCCGACGTTACTGCCTGCTTGGGCTTGA   |
| U-SSTs-24H-68 | 5-10            | ATCGCGATGAAGTCCCCGATAATTTATTTCTTGCCCCGATTT   |
| U-SSTs-24H-69 | 5-11            | ACTTGGCCATATTAACGCTTGTGCATTAACCGAGTCATATC    |
| U-SSTs-24H-70 | 5-12            | CACACGTCCGGCACGAGGAGTATTCTGCACGAAAAATCTACA   |
| U-SSTs-24H-71 | 5-13            | CTGCAGGACATTGCCGGCCGGAACCCCCAGCGGGGGAGGCGC   |
| U-SSTs-24H-72 | 5-14            | GCGTCGTGGTGGGAAGTATTGTAGTTTACTCGGGCCCTCTGC   |
| U-SSTs-24H-73 | 6-1             | TTTTTTTTTTTATAGTACACCCTCAACGATAATTTTTTTTTTT  |
| U-SSTs-24H-74 | 6-2             | TTTAGGTTTCCCTGTTGTGTCGACGCGCCGGAATAAGAGGTATC |
| U-SSTs-24H-75 | 6-3             | CTAGTCTCGAAATCTGGCGGACGCTGGGCTTGTGTACGGCT    |
| U-SSTs-24H-76 | 6-4             | TTGGGTAGTTACGGATAATGGAATAGGGTAGGGTTGTCTTAC   |
| U-SSTs-24H-77 | 6-5             | ACACGGCCGCGAGAATACGCCTCGCGCGCCGATAGTCTAAAA   |
| U-SSTs-24H-78 | 6-6             | GAACTCTTACTGGGAATCAACGCCAGAGTTCTTGACTCGAGG   |
| U-SSTs-24H-79 | 6-7             | TGACATCTGGTGTTCGGAAGCAGACTGATAGATACTGTTTGG   |
| U-SSTs-24H-80 | 6-8             | TCGGGATGGTTTCCATTCTCATGCTGTCTATGGATCGCGGA    |
| U-SSTs-24H-81 | 6-9             | CTATTAGTTTTGAGTGACCGTCCCGCACTAGTAGGAGACTGA   |
| U-SSTs-24H-82 | 6-10            | CTTCCGCCGTTCTCGCAGTGCTTCATCGCGATCTGCGGCAAG   |
| U-SSTs-24H-83 | 6-11            | TTAGCAGGTATCTCCTACCTTTATGGCCAAGTATCGGGGGAC   |
| U-SSTs-24H-84 | 6-12            | GGACGGATGGTTAGGTACTGGCCCCGACGTGTGAAGCGTTTAA  |
| U-SSTs-24H-85 | 6-13            | CGAGCGATCTAGAGAATGATCATGTCTGCAGACTCCTCGTG    |
| U-SSTs-24H-86 | 6-14            | AGTGACGGTGAATTTATTTGCTCACCACGACGCCCGGGCA     |
| U-SSTs-24H-87 | 6-15            | ACCCGAGAGCTTTTTTTTTTTTTTTTTTTTTTTTCAATACTTCC |
| U-SSTs-24H-88 | 7-1             | GCAGTGTATGGACGCTGGAAGGAAACCTAAAGGTGTACTATA   |
| U-SSTs-24H-89 | 7-2             | ACCTTAACTGTAAGTAATATGTGAGACTAGGTCGACAACAG    |
| U-SSTs-24H-90 | 7-3             | ATATCTTACCGGACGACGCTAAACTACCCAATCCGCCAGATT   |
| U-SSTs-24H-91 | 7-4             | CATCCTTTGCTCACTACAAGTGCGGCCGTGTCCATTATCCGT   |
| U-SSTs-24H-92 | 7-5             | ATCTGTTCTTCCCTCAAGGTTGTAAGAGTTCGGCGTATTCTC   |
| U-SSTs-24H-93 | 7-6             | CGTGGGATTACAGCCGGTTTGCCAGATGTCAGTTGATTCCCA   |

| Seq_ID         | Location | Sequence                                     |
|----------------|----------|----------------------------------------------|
| U-SSTs-24H-94  | 7-7      | ACCGTCCTCTCGACCTTCCCAACCATCCCGAGCTTCCGAACA   |
| U-SSTs-24H-95  | 7-8      | GTGGTACCTCCGCAGGTTGTCAAATAATAGTGAGAAATGGAA   |
| U-SSTs-24H-96  | 7-9      | AGTGATTGACTGAGTGGCCTCACGGCGGAAGACGGTCACTCA   |
| U-SSTs-24H-97  | 7-10     | CGTGCTAAAAATGCCTTGAGGTACCTGCTAAGCACTGCGAGA   |
| U-SSTs-24H-98  | 7-11     | TAAGTGGTTTTAAAACGCCGTCCCATCCGTCCAAGGTAGGAGA  |
| U-SSTs-24H-99  | 7-12     | ACAATACTTAGTTCGAATCAGAAGATCGCTCGCCAGTACCTAA  |
| U-SSTs-24H-100 | 7-13     | CATATGCCCAAACATTCTACCCACCGTCACTGATCATTTCTCT  |
| U-SSTs-24H-101 | 7-14     | GCTGATCATAATCATCGTTCGGCTCTCGGGTAGCAATAAATT   |
| U-SSTs-24H-102 | 8-1      | TTTTTTTTTTTGTGAGGTTAGTCCATACTGCTTTTTTTTTTT   |
| U-SSTs-24H-103 | 8-2      | GACAGGAAGGGCCTAACAGTCACAGTTAAGGTCTTCCAGCGT   |
| U-SSTs-24H-104 | 8-3      | TCGCGAGTAATCTACCTCCTACGGTAAGATATCATATTACTT   |
| U-SSTs-24H-105 | 8-4      | ACGAGCGGCCAGTGTACCTTTAGCAAAGGATGTAGCGTCGTC   |
| U-SSTs-24H-106 | 8-5      | CGGAGCTTTTGCCCTACATATGAAGAACAGATACTTGTAGTG   |
| U-SSTs-24H-107 | 8-6      | CGAGAAAATGGCCACGACACTGTAATCCACGAACCTTGAGG    |
| U-SSTs-24H-108 | 8-7      | AGCAGTCACTCGCAGTATCGCGAGAGGACGGTCAAACCGGCT   |
| U-SSTs-24H-109 | 8-8      | GCGACCGAAAATCCCGGTGCTGGAGGTACCACTGGGAAGGTC   |
| U-SSTs-24H-110 | 8-9      | ACGCCTGCGCGGTGAGGGTCAATCACTGACAACCTGC        |
| U-SSTs-24H-111 | 8-10     | TCGCGACTTTAGAAGGTATCGTTTTTTAGCACGGAGGCCACTC  |
| U-SSTs-24H-112 | 8-11     | GAACGAAGATAGTGCTATGTTTAAACCACTTACCTCAAGGCA   |
| U-SSTs-24H-113 | 8-12     | GGCTCTCGCGGTACAGCCACTCTAAGTATTGTGACGGCGTTT   |
| U-SSTs-24H-114 | 8-13     | TGAATCTAAGGGCCCTGCGGGTTGGGCATATGTCTGATTCTGA  |
| U-SSTs-24H-115 | 8-14     | CACGCGGGCATGGGTGTTTTATTATGATCAGCGGTAGAATGT   |
| U-SSTs-24H-116 | 8-15     | TTGGCGGATTTTTTTTTTTTTTTTTTTTTTTTTCGAACGATGA  |
| U-SSTs-24H-117 | 9-1      | TCATTACAGGGTTTTGTCTAATCCTTCCGTGCTACTAACCTCAC |
| U-SSTs-24H-118 | 9-2      | GATTACATGCCAGAAAATAGTTTACTCGCGAGACTGTTAGGC   |
| U-SSTs-24H-119 | 9-3      | AGGCTCTAACGCCGTGCTCCCGGCCGCTCGTTAGGAGGTAGA   |
| U-SSTs-24H-120 | 9-4      | GTTAACTGGCAATCTACTGACAAAAGCTCCGAAAGGTACTACT  |
| U-SSTs-24H-121 | 9-5      | CGCATGTGCTCGCGGCCCATCCATTTTCTCGATATGTAGGGC   |
| U-SSTs-24H-122 | 9-6      | GGAACAAATTCACATACTCGCAGTACTGCTAGTGTCTGTTGGC  |
| U-SSTs-24H-123 | 9-7      | ACCGCCGAGTCCAAGCCGTGCTTTCGGTTCGCGCGATACTGCG  |
| U-SSTs-24H-124 | 9-8      | TCGATTTGTCAGCAGAACTCTGCGCAGGCGTAGCACCGGGGA   |
| U-SSTs-24H-125 | 9-9      | CGATCGCAAGACTTATCCGGCAAAGTCGCGAGACCCCTGACC   |
| U-SSTs-24H-126 | 9-10     | CGACAGTGACCAACGCCTCCCATCTTCGTTCCGATACCTTCT   |
| U-SSTs-24H-127 | 9-11     | ATTTTCTCTGTAACACGCGCTGCGCGAGAGCCAACATAGCACT  |
| U-SSTs-24H-128 | 9-12     | GTCTCGATAAGATCAGGCCGTCTTAGATTCAAGTGGCTGTAC   |
| U-SSTs-24H-129 | 9-13     | GTGGCCAACACATCGTGAAATTGCCCGCGTGCCCGCAGGCC    |
| U-SSTs-24H-130 | 9-14     | TTCGAGCTCGACAGTGAGCTAATCGCGCCAATAAAAACACCCA  |
| U-SSTs-24H-131 | 10-1     | TTTTTTTTTTTTCGCCATCGCGCCCTGTAATGATTTTTTTTTTT |
| U-SSTs-24H-132 | 10-2     | ATTCTCATTATGGGACGGGGGGCATGTAATCATTAGACAAA    |
| U-SSTs-24H-133 | 10-3     | GCATGATGTACAGGAAGGGAGCGTTAGAGCCTACTATTTTCT   |
| U-SSTs-24H-134 | 10-4     | CGGAGAAGAGGAATATGTGCGTGCCAGTTAACGGGACGACGG   |
| U-SSTs-24H-135 | 10-5     | GAACAGTCTTTCCAAAGCGTCGACGACATGCGGTGAGTAGAT   |
| U-SSTs-24H-136 | 10-6     | GTCTAACGCAAGTAAGGTAATGAATTTGTTCCGATGGGCCGC   |
| U-SSTs-24H-137 | 10-7     | TTATAGCTATGGGGGAGAACAGACTCGGCGGTGCGAGTATGT   |
| U-SSTs-24H-138 | 10-8     | TCATTTGATTCTGCTTAGGTTTGACAAAATCGAGCACGGCTTG  |
| U-SSTs-24H-139 | 10-9     | GTTGGGGCATCTTTCGTACGGTCTTTCGATCGAGAGTTCTGC   |
| U-SSTs-24H-140 | 10-10    | TGCGGACCTCTTACAAATCCCGGTCACTGTTCGGCCGGATAAG  |

| Seq_ID         | Location | Sequence                                      |
|----------------|----------|-----------------------------------------------|
| U-SSTs-24H-141 | 10-11    | GCGTCCTCTTTTCAGGGTCATTACAGGAAAATGGGAGGCGTT    |
| U-SSTs-24H-142 | 10-12    | AGACTCCTTATCCTCGCGAGTCTTATCGAGACCAGCGCGTGT    |
| U-SSTs-24H-143 | 10-13    | CAACCAAGGCGACGTGAGAGTGTGTTGGCCACACGGCCTGAT    |
| U-SSTs-24H-144 | 10-14    | TAAATAGTTTCCCAGTGCAGTCGAGCTCGAAATTTACGAT      |
| U-SSTs-24H-145 | 10-15    | CCAAAGCTCATTTTTTTTTTTTTTTTTTTTTTTTAGCTCACTG   |
| U-SSTs-24H-146 | 11-1     | TTCATCTGAGCGTGCGATACTTAATGAGAATCGCGATGGCGC    |
| U-SSTs-24H-147 | 11-2     | TGGATTTCATCGGATATTCCGCTACATCATGCCCCCGTCCCA    |
| U-SSTs-24H-148 | 11-3     | TGCTTCCTGAAACGACCTTACCTCTTCTCCGCTCCCTTCCCTG   |
| U-SSTs-24H-149 | 11-4     | GCAGGTATCTATCGTAGTCGGAAGACTGTTCCGCACATATTC    |
| U-SSTs-24H-150 | 11-5     | CGCTAACATGTACAAGCATTTTGCCTTAGACGACGCTTTGGA    |
| U-SSTs-24H-151 | 11-6     | ATCGCCGGCCGCCGTTTCGGCATAGCTATAAATTACCTTACT    |
| U-SSTs-24H-152 | 11-7     | TGATCGAGTGAAACTGGAGCCAATCAAAATGATGTTCTCCCCC   |
| U-SSTs-24H-153 | 11-8     | CCTTTCCGTCAGCTTCAAATCATGCCCAACAACCTAAGCAG     |
| U-SSTs-24H-154 | 11-9     | CTTGCGCTTTGGATTGATCGCGAGGTCCGCACCGTACGAAAG    |
| U-SSTs-24H-155 | 11-10    | ACACTATAGCTAGACGTGGGGAAGAGGACGCGGGATTGTAA     |
| U-SSTs-24H-156 | 11-11    | GGACGAGGCCAAACCCCGGAATAAGGAGTCTATGACCCTGAA    |
| U-SSTs-24H-157 | 11-12    | CCCACCATTGGGGCTACACTGCCTTGGTTGACTCGCGAGGA     |
| U-SSTs-24H-158 | 11-13    | TGAAGTTGGTTTCTTATCGAGAAACTATTTAACTCTCACGTC    |
| U-SSTs-24H-159 | 11-14    | GATCTTGGTTGTGTGTGTATCTGAGCTTGGCTGCACGCGGG     |
| U-SSTs-24H-160 | 12-1     | TTTTTTTTTTGAGGTTTGAAGGCTCAGATGAATTTTTTTTTT    |
| U-SSTs-24H-161 | 12-2     | CATAATATGTTTCTCTCCGCTCGATGAATCCAAGTATCGCAC    |
| U-SSTs-24H-162 | 12-3     | TATGCGTCCGACCTCGTGGTTTTTCAGGAAGCAGCGGAATATC   |
| U-SSTs-24H-163 | 12-4     | ATACTATGTTCCGTGTGGGACTAGATACCTGCGTAAGGTCGT    |
| U-SSTs-24H-164 | 12-5     | GAACCCTAATTCCTTAATACGACATGTTAGCGCCGACTACGA    |
| U-SSTs-24H-165 | 12-6     | ACAGTCGAGCGAGTGAGTGACCGGCCGCGATAAATGCTTGT     |
| U-SSTs-24H-166 | 12-7     | TAGGCTGGCCGGTCAAGACCGTCACTCGATCAGCCGAACGGG    |
| U-SSTs-24H-167 | 12-8     | GAAACATGCATGAGGCCATCGTGACGGAAAGGGCTCCAGTT     |
| U-SSTs-24H-168 | 12-9     | TATACCTCAATTTCTATAAACCAAAGCGCAAGGATTTGAAGC    |
| U-SSTs-24H-169 | 12-10    | ATAAAAAGAGCTCTTAAGTGAAGCTATAGTGTGCGATCAATC    |
| U-SSTs-24H-170 | 12-11    | TAGAATCTCATGGGCAACACCTGGCCTCGTCCCCCACGTCT     |
| U-SSTs-24H-171 | 12-12    | AGTCAACAGCATTAGGGTATGCAATGGTGGGGTTCCGGGGTT    |
| U-SSTs-24H-172 | 12-13    | AACTTAATTGGACACTCATTTGAACCAACTTCAAGTGTAGCCC   |
| U-SSTs-24H-173 | 12-14    | CGGGTCGTATTTTCATGTATTTCCAACCAAGATCCTCGATAAGA  |
| U-SSTs-24H-174 | 12-15    | TGTTGCCATATTTTTTTTTTTTTTTTTTTTTTTTGGATACACACA |
| U-SSTs-24H-175 | 13-1     | CGACCCTACTTTCCCGAGAACACATATTATGCTTCGAACCTC    |
| U-SSTs-24H-176 | 13-2     | CGGCTCCGCGCGCTTTAATGCCGGACGCATAAGCGGAGAGAA    |
| U-SSTs-24H-177 | 13-3     | TTAAATCCAAGCAGACTCCAAAACATAGTATAACCACGAGGT    |
| U-SSTs-24H-178 | 13-4     | ATTTCCCCACGTTAGAGTGACATTAGGGTTCGTCCCCACAGG    |
| U-SSTs-24H-179 | 13-5     | AAGAGAACCTCGATATAATACGCTCGACTGTCGTATTAAGGA    |
| U-SSTs-24H-180 | 13-6     | ACAGGCATTCGAAAACGTTGAGGCCAGCCTAGTCACTCACTC    |
| U-SSTs-24H-181 | 13-7     | CGTGCGTTTTATGCGAATCACTGCATGTTTCCGGTCTTGACC    |
| U-SSTs-24H-182 | 13-8     | ACTCATAACCAAGGAACTATCATTGAGGTATACGATGGCCTCA   |
| U-SSTs-24H-183 | 13-9     | TACACCGGAACTTGATACTCTCTTTTTTATGTTTATAGAAA     |
| U-SSTs-24H-184 | 13-10    | TACGGAGTGTACTAACGCGCTGAGATTCATCACTTAAGAG      |
| U-SSTs-24H-185 | 13-11    | AGATTTCCGACCTGGCTTATGGCTGTTGACTGGTGTGCCCCA    |
| U-SSTs-24H-186 | 13-12    | TTGAGACCCTGTCTAGTAGAACAATTAAGTTCATACCCTAAT    |
| U-SSTs-24H-187 | 13-13    | CCTCGTCTTGCGTGCCGCCAGATACGACCCGCAATGAGTGTC    |

| Seq_ID         | Location | Sequence                                     |
|----------------|----------|----------------------------------------------|
| U-SSTs-24H-188 | 13-14    | TATTACTTTCTCCTACCAGGTTATGGCAACAGAATACATGAA   |
| U-SSTs-24H-189 | 14-1     | TTTTTTTTTTTGATCAAGGTCAAAGTAGGGTCGTTTTTTTTTTT |
| U-SSTs-24H-190 | 14-2     | GAGGAACTTGAGTTAGACTTTGCGCGGAGCCGGTTCTCGGGA   |
| U-SSTs-24H-191 | 14-3     | CCAGCAGGACTTTGCCATACCCTTGGATTTAAGCATTAAGC    |
| U-SSTs-24H-192 | 14-4     | TAGTGCCAAGAAAACAATAGACGTGGGGAAATTTGGAGTCTG   |
| U-SSTs-24H-193 | 14-5     | AGGTGAATACTACCCCTATGTGAGGTTCTCTTGTCACTCTAA   |
| U-SSTs-24H-194 | 14-6     | TTGATTGAAGGAAGGAGTGTCCGAATGCCTGTGTATTATATC   |
| U-SSTs-24H-195 | 14-7     | GGCCAATCTGCACGAGCCCGGTAAAACGCACGTCACGTTTTT   |
| U-SSTs-24H-196 | 14-8     | GGCACCTTGCAGATAGTAGGTTTGGTATGAGTGTGATTCGCA   |
| U-SSTs-24H-197 | 14-9     | CGGACAGTTAGAATACCCAGAGTTCCGGTGTATGATAGTTCC   |
| U-SSTs-24H-198 | 14-10    | CCCGACTTGAGTGAGTCCCTCAACACTCCGTAAGAGTATCAA   |
| U-SSTs-24H-199 | 14-11    | TTGGTATAGCATCTAACCCGGGTCCGAAATCTGCGCGTTAGT   |
| U-SSTs-24H-200 | 14-12    | TCACGGAACCTCGCTATCACACAGGGTCTCAACATAAGCCAG   |
| U-SSTs-24H-201 | 14-13    | TCACCAATGGTGAGAAAACAGCGCAAGACGAGGTTCTACTAGA  |
| U-SSTs-24H-202 | 14-14    | CGACCGGACCCTGTTCTCGCTAGAAAAGTAATACTGGCGGCAC  |
| U-SSTs-24H-203 | 14-15    | TAGATGTTCTTTTTTTTTTTTTTTTTTTTTTTTACCTGGTAGG  |
| U-SSTs-24H-204 | 15-1     | GAATGAACCCGGGGTTTTTCATCAAGTTCCTCTGACCTTGATC  |
| U-SSTs-24H-205 | 15-2     | GAATTACGAGAGTCGACTGAGGTCCTGCTGGAAAGTCTAACT   |
| U-SSTs-24H-206 | 15-3     | CAGATTTCCGCTAATTCCTTCCTTGGCACTAGGTATGGCAA    |
| U-SSTs-24H-207 | 15-4     | GTGTATGCCTCCGCGGTATGCGTATTCACCTTCTATTGTTTT   |
| U-SSTs-24H-208 | 15-5     | TAATCCGTAGTTTCCGCGAAACTTCAATCAAACATAGGGGTA   |
| U-SSTs-24H-209 | 15-6     | GATCGACGGTGAACCTTAGTGCAGATTGGCCGACACTCCTTC   |
| U-SSTs-24H-210 | 15-7     | CGGGGCCCTCCCAACCGCGAGCAAGGTGCCCCGGGCTCGTG    |
| U-SSTs-24H-211 | 15-8     | CCATCTTCAGAAATGGCTCTCTTAACTGTCCGACCTACTATCT  |
| U-SSTs-24H-212 | 15-9     | GAACCCTGTACACCTCTAGGTTCAAGTCGGGTCTGGGTATTC   |
| U-SSTs-24H-213 | 15-10    | AGTGTATCTCGAGTGTGATTCGCTATAACCAAGAGGGACTCAC  |
| U-SSTs-24H-214 | 15-11    | ATTGGGCGTTTGATGCGTCTTGGTTCCGTGACCGGGTTAGAT   |
| U-SSTs-24H-215 | 15-12    | GAGCCTGTACGGTTTGCCCCGCCATTGGTGATGTGATAGCGA   |
| U-SSTs-24H-216 | 15-13    | GGACTTCCTCCTCTCGCTGGAGGTCCGGTCCGGCTGTTTCTCA  |
| U-SSTs-24H-217 | 15-14    | AGGCATTACAATACGTATCGAAGAACATCTAAGCGAGAACAG   |
| U-SSTs-24H-218 | 16-1     | TTTTTTTTTTTTTGGCATGTACGCGGGTTCATTCTTTTTTTTTT |
| U-SSTs-24H-219 | 16-2     | AGAACGGCCACTGTTGTATTCCTCTCGTAATTCATGAAAACCC  |
| U-SSTs-24H-220 | 16-3     | TTCGGAGGCACTCGCTGATCCGCGGAAATCTGCTCAGTCGAC   |
| U-SSTs-24H-221 | 16-4     | GTATACTCAGGTCTAAGGCGGAGGCATACACGAAGGAATTA    |
| U-SSTs-24H-222 | 16-5     | ACTGGGTATAGAGTTGATGAACTACGGATTAGCATAACCGCG   |
| U-SSTs-24H-223 | 16-6     | GAGCTATCCATGATTTACTTTCACCGTCGATCTTTCGCGGAA   |
| U-SSTs-24H-224 | 16-7     | TCTTTGTAATTCATCGAACGGAGGGGCCCGCACTAAGGTT     |
| U-SSTs-24H-225 | 16-8     | GTCTCAGGTGTTGCAACGCGTTCGAAAGATGGTCGCGGTTGG   |
| U-SSTs-24H-226 | 16-9     | TAGGACTGCATAGTCAATGGCGTACAGGTTTCAGAGAGCCAT   |
| U-SSTs-24H-227 | 16-10    | TGTGGTCAAAGAAGCTAAGGGCGAGATACACTACCTAGAGGT   |
| U-SSTs-24H-228 | 16-11    | CATGAGAAGGTGACATCTTGCAAACGCCAATGAATCACACT    |
| U-SSTs-24H-229 | 16-12    | ACTGCATCTCGGTCTCTCTACGTACAGGCTCAAGACGCATC    |
| U-SSTs-24H-230 | 16-13    | TCCAGCGTGGTTGGACAGCGTGGAGGAAGTCCCAGGGCAAAC   |
| U-SSTs-24H-231 | 16-14    | CTCTCTCCCGCGGGGGGCTTGTGTAATGCCTTCCAGCGAGA    |
| U-SSTs-24H-232 | 16-15    | AAGGTCACTATTTTTTTTTTTTTTTTTTTTTTTTCGATACGTA  |
| U-SSTs-24H-233 | 17-1     | ACACCATATTAACCCCGGCTGGCCGTTCTCGTACATGCCA     |
| U-SSTs-24H-234 | 17-2     | CGATTTTCCTTATTAGGGGATGCCTCCGAAGAATACAACAG    |

| Seq_ID         | Location | Sequence                                         |
|----------------|----------|--------------------------------------------------|
| U-SSTs-24H-235 | 17-3     | GCGGTGTACCTATTTGAGTGTCTGAGTATACGGATCAGCGAG       |
| U-SSTs-24H-236 | 17-4     | CGAGTGTGTCGTCGGGCACGGTATAACCCAGTGCGCCTTAGAC      |
| U-SSTs-24H-237 | 17-5     | CAATCCGGCACGGTCACGTAATGGATAGCTCTCATCAACCTC       |
| U-SSTs-24H-238 | 17-6     | TGCACATGAGATACGTATAACATTACAAAGAAAAGTAAATCA       |
| U-SSTs-24H-239 | 17-7     | AGCAGGCTGCCCATGCCGGTCCACCTGAGACCGTTTCGATGGA      |
| U-SSTs-24H-240 | 17-8     | CCCGCGGTCAGAGATAATGTATGCAGTCCTAACGCGTTCGAA       |
| U-SSTs-24H-241 | 17-9     | GACATTAACTGTTTCGTATGCATTTGACCACAGCCATTGACTA      |
| U-SSTs-24H-242 | 17-10    | GGTGAGACCGGGGTCCCAACACCTTCTCATGCCCTTAGCTTC       |
| U-SSTs-24H-243 | 17-11    | GATCTGAGCATAACCTAGCTAGAGATGCAGTGCAAGATGTCA       |
| U-SSTs-24H-244 | 17-12    | GTTACGACGGCGGCTACTAACCACGCTGGATAGAGATGACC        |
| U-SSTs-24H-245 | 17-13    | GACAACAAATTTCTTTGACGTCGGGAGAGAGACGCTGTCCAA       |
| U-SSTs-24H-246 | 17-14    | AAGGCGGCTTCCGACATGAATAGTGACCTTCAAGCCCCCG         |
| U-SSTs-24H-247 | 18-1     | TTTTTTTTTTTAGTCTATGCCCTAATATGGTGTTTTTTTTTTT      |
| U-SSTs-24H-248 | 18-2     | TCGGTCATCCTGTCAATTGGCGAAGGAAAATCGGCCGGGGTTT      |
| U-SSTs-24H-249 | 18-3     | GGACACAGGGTTCCTCGTGAGTAGGTACACCGCTCCCCCTAAT      |
| U-SSTs-24H-250 | 18-4     | CACAGTACTTTACCGTGATGACGACACACTCGACACTCAAAT       |
| U-SSTs-24H-251 | 18-5     | TCCCCATTCCGTACTAACGACGTGCCGGATTGCCGTGCCCGA       |
| U-SSTs-24H-252 | 18-6     | TCGGACTTTCATTTCAAAGAGTCTCATGTGCATTACGTGACC       |
| U-SSTs-24H-253 | 18-7     | ACTTTTTCCGAGAACGGAAGTGGCAGCCTGCTGTTATACGTA       |
| U-SSTs-24H-254 | 18-8     | GTCAACAGACATAAATTTAGACTGACCGCGGGGACCGGCATG       |
| U-SSTs-24H-255 | 18-9     | TCATAGATGTTTAAAGATTAGCAGTTAATGTCTACATTATCT       |
| U-SSTs-24H-256 | 18-10    | TACACCGGGCAGCATCAATACCCGGTCTCACCTGCATACGAA       |
| U-SSTs-24H-257 | 18-11    | CAATGTGGGCAATTCTCGTGAATGCTCAGATCTGTTGGGACC       |
| U-SSTs-24H-258 | 18-12    | ACATTCCGCTCCAGTGAATTATGCCGTCGTAAGTAGCTAGGTT      |
| U-SSTs-24H-259 | 18-13    | TCCAAGCGACCGGATGTATAAAATTTGTTGTCTGTTAGTAGCC      |
| U-SSTs-24H-260 | 18-14    | CTAGTTTTCTGGATACGAGAGAAAGCCGCCTTACGTCAAAGA       |
| U-SSTs-24H-261 | 18-15    | ATTCTAAGAAATTTTTTTTTTTTTTTTTTTTTTTTTTTTTCATGTCGG |
| U-SSTs-24H-262 | 19-1     | AATTAACGCTACTTACCTACCGGATGACCGAGGGCATAGACT       |
| U-SSTs-24H-263 | 19-2     | ACGCACTCGACCACTAGCACCCCTGTGTCCCGCCAATGACA        |
| U-SSTs-24H-264 | 19-3     | CCGCTGAGGATTGTGGACACCAAGTACTGTGACTCACGGGAA       |
| U-SSTs-24H-265 | 19-4     | GAAGACACTGGAGGCGCCGATCGAATGGGGATCATCACGGTA       |
| U-SSTs-24H-266 | 19-5     | GTGCCGTTAGGAAACGTAAAAGAAAAGTCCGAGTCGTTAGTAC      |
| U-SSTs-24H-267 | 19-6     | GCACTGTAATATATCAATGCTCGGAAAAGTCTCTTTGAAAT        |
| U-SSTs-24H-268 | 19-7     | TTCGAATCGGTGGGCTATCAAGTCTGTTGACAGTTCGGTTCT       |
| U-SSTs-24H-269 | 19-8     | TCTATCATATTAGATTAGCACACATCTATGATCTAAATTTAT       |
| U-SSTs-24H-270 | 19-9     | TCTGGAAATAACGGCAGTCCTGCCCGGTGACTAATCTTTAA        |
| U-SSTs-24H-271 | 19-10    | CAAACGGATGGGTTCTCGACTGCCACATTTGGTATTGATGCT       |
| U-SSTs-24H-272 | 19-11    | CCACTACTAGTACATCAATGAGAGCGAATGTTACAGAGAATT       |
| U-SSTs-24H-273 | 19-12    | TACCAGTATGCCCGGGGTGTAGTCGCTTGAATAATTTACTG        |
| U-SSTs-24H-274 | 19-13    | GGTTATTAGCTATTGGTTTAAAGAAAAGTATTATACATCCG        |
| U-SSTs-24H-275 | 19-14    | GGGCGACGGCGTGGTATAAATTTCTTAGAATCTCTCGTATCC       |
| U-SSTs-24H-276 | 20-1     | TTTTTTTTTTTTTAAACATCATAGCGTTAATTTTTTTTTTTTT      |
| U-SSTs-24H-277 | 20-2     | CAGCAAGAAAGACAAGAATGCGTCGAGTCCGTGGTAGGTAAG       |
| U-SSTs-24H-278 | 20-3     | TAAGGCCGCGGTTACTGACGAATCCTCAGCGGGGTGCTAGTG       |
| U-SSTs-24H-279 | 20-4     | CGGCTATTTTTAATTAAGGTCCAGTGTCTTCGGTGTCCACA        |
| U-SSTs-24H-280 | 20-5     | GCGCCTGTTTCGTACGTTCTTGCCTAACGGCACATCGGCGCCT      |
| U-SSTs-24H-281 | 20-6     | TAAGTAATGACCGTGAGATAATATTACAGTGCTTTTACGTTT       |

| <b>Seq_ID</b>  | <b>Location</b> | <b>Sequence</b>                                |
|----------------|-----------------|------------------------------------------------|
| U-SSTs-24H-282 | 20-7            | GCTGACTCTCTGCGCCGGAATACCGATTCGAAAGCATTGATA     |
| U-SSTs-24H-283 | 20-8            | ACCTCTCCCTAGATTTTCGGGCAATATGATAGATTGATAGCCC    |
| U-SSTs-24H-284 | 20-9            | TGTCATATCAGGGCACCATTATTATTTCCAGAGTGCTAATCT     |
| U-SSTs-24H-285 | 20-10           | CTTGAAAATTGGAACGGGTATCCATCCGTTTGAGGACTGCCG     |
| U-SSTs-24H-286 | 20-11           | CAGATGTCCGAGCACCCATAAACTAGTAGTGGAGTCGAGAAC     |
| U-SSTs-24H-287 | 20-12           | AAAACTTAAGCCTATGGGGAGCATACTGGTATCATTGATGT      |
| U-SSTs-24H-288 | 20-13           | ACCCGAATTTACCTAGTTGTTAGCTAATAACCTACACCCCGG     |
| U-SSTs-24H-289 | 20-14           | AGGTTGTATGGGGCCACATATCGCCGTCGCCCTTAAACCAAT     |
| U-SSTs-24H-290 | 20-15           | GTAAGTACCGTTTTTTTTTTTTTTTTTTTTTTTTTTTTTATACCAA |
| U-SSTs-24H-291 | 21-1            | AAAGTCATTGCATGTCTTTCGTTTTCTTGCTGTGATGTTAAA     |
| U-SSTs-24H-292 | 21-2            | CCTTCTGATTAAGCAGCACATCGCGGCCTTAGCATTCTTGTC     |
| U-SSTs-24H-293 | 21-3            | AAAAGCGGCAGTGCACCTATCAAATAGCCGTCGTCAGTAAC      |
| U-SSTs-24H-294 | 21-4            | ACCTCAGACCTATTTTGCCTTGAACAGGCGCACCTTTAATTA     |
| U-SSTs-24H-295 | 21-5            | CAACACTTAGTCGTTAAAAGCTCATTACTTACAAGAACGTAC     |
| U-SSTs-24H-296 | 21-6            | CTCAATAGTTCCTTTCGGTTCGGAGAGTCAGCTTATCTCACGG    |
| U-SSTs-24H-297 | 21-7            | ACATCAATGTATCGCCCCGGCGAGGGAGAGGTATTCCGGCGCA    |
| U-SSTs-24H-298 | 21-8            | CTGCGAAGGTGTCCATACTAATGATATGACAGCCCCGAAATCT    |
| U-SSTs-24H-299 | 21-9            | CCCTATGGCTAAACCTAGGGGAATTTTCAAGTAATGGTGCCC     |
| U-SSTs-24H-300 | 21-10           | TATAAACACATCGAATGTCCCCGGACATCTGATAACCGTTCC     |
| U-SSTs-24H-301 | 21-11           | TACGTTTTAAAGCTGTTGCCCTCTTAAGTTTTTTTTTAGGGTGCT  |
| U-SSTs-24H-302 | 21-12           | CGCCAGGCATTGCGTGGTCACAAATTCGGGTTCCCCATAGGC     |
| U-SSTs-24H-303 | 21-13           | GCATTGCTTATTTCCAAGGGACATAACAACCTAACAACTAGGT    |
| U-SSTs-24H-304 | 21-14           | CCACGGCTCACGTTCCAAGCTCGGTACTTACATATGTGGCCC     |
| U-SSTs-24H-305 | 22-1            | TTTTTTTTTTTAGGTTTCCACAGCAATGACTTTTTTTTTTTTTT   |
| U-SSTs-24H-306 | 22-2            | ATACTGTTCCCCAGACCAACCTAATCAGAAGGCGAAAGACAT     |
| U-SSTs-24H-307 | 22-3            | GAGGTATTCTACCCTACGGTCCTGCCGCTTTTATGTGCTGCT     |
| U-SSTs-24H-308 | 22-4            | AGTATTCAAGTTGCTTAACGAAGGTCTGAGGTGATAGGTGCA     |
| U-SSTs-24H-309 | 22-5            | ATCGACTACCGATGGCCACGAACCTAAGTGTGAAGGCAAAAT     |
| U-SSTs-24H-310 | 22-6            | GCATATGTGACACGGGCACTCGAACTATTGAGGCTTTTAACG     |
| U-SSTs-24H-311 | 22-7            | TCGCCTATTTTCGATGGTCTGTACATTGATGTGCAACCGAAA     |
| U-SSTs-24H-312 | 22-8            | CCCAAGCTAGCTGCGGGTGTACACCTTCGCAGCGCCGGGCGA     |
| U-SSTs-24H-313 | 22-9            | GACCAATCGCTAGCGTTTATATAGCCATAGGGTTAGTATGGA     |
| U-SSTs-24H-314 | 22-10           | CGATTTTACACGGCCTGAATTATGTGTTTATAACCCCTAGGTT    |
| U-SSTs-24H-315 | 22-11           | TCCATGGGGGACTATGGAATGCTTTAAACGTAGGGACATTCG     |
| U-SSTs-24H-316 | 22-12           | ACATTAGTTAAACCGACATCAAATGCCTGGCGGAGGCAACAG     |
| U-SSTs-24H-317 | 22-13           | ACACCAGTGCAGTCGGTCCATAAGCAATGCGTGACCACGC       |
| U-SSTs-24H-318 | 22-14           | TATGTCAAGGAATAAACATCGGTGAGCCGTGGTCCCTTGGA      |
| U-SSTs-24H-319 | 22-15           | CGATGCTCGTTTTTTTTTTTTTTTTTTTTTTTTTTTAGCTTGGAAC |
| U-SSTs-24H-320 | 23-1            | GTATCAATGCAGACAGTCTAAGGAACAGTATTGTGGAAACCT     |
| U-SSTs-24H-321 | 23-2            | CTTGAGGTTGAGACGTTTTTTTAGAATACCTCGGTTGGTCTGG    |
| U-SSTs-24H-322 | 23-3            | GCCGATCCTTTCAGCTACCACCTTGAATACTGACCGTAGGGT     |
| U-SSTs-24H-323 | 23-4            | TCTTTACTGGCGCCACTGAGGGGTAGTCGATTTCGTTAAGCAA    |
| U-SSTs-24H-324 | 23-5            | ATAATGTGCTTCGCCTGAAAATCACATATGCTCGTGGCCATC     |
| U-SSTs-24H-325 | 23-6            | CATCATCAATAACCACGCTTTAAATAGGCGAGAGTGCCCGTG     |
| U-SSTs-24H-326 | 23-7            | TCAATCGACGCTGGGGCAGGGCTAGCTTGGGCAGACCATCGA     |
| U-SSTs-24H-327 | 23-8            | GTACATTTCATGGGATCTGGCCGCGATTGGTCTACACCCGCAG    |
| U-SSTs-24H-328 | 23-9            | TGGTCCGCACCTGTAGCGCCCTGTAAAATCGTATAAACGCTA     |





**U-SSTs-12H**

| <b>Seq_ID</b> | <b>Location</b> | <b>Sequence</b>                              |
|---------------|-----------------|----------------------------------------------|
| U-SSTs-12H-1  | 1-1             | TGGGCTCGTGATGACACCGCACATATTATGCTTCGAACCTC    |
| U-SSTs-12H-2  | 1-2             | AGTTATGCGGGCTTAATGACACGGACGCATAAGCGGAGAGAA   |
| U-SSTs-12H-3  | 1-3             | GGCCTGACCGCCCTACGTTTGAACATAGTATAACCACGAGGT   |
| U-SSTs-12H-4  | 1-4             | TGCTCGAGGTCACCTTCTCAAATTAGGGTTCGTCCCCACAGG   |
| U-SSTs-12H-5  | 1-5             | CTGATTCCCTCCAAGCGAATAAGCTCGACTGTCGTATTAAGGA  |
| U-SSTs-12H-6  | 1-6             | CGACTCTAACTACATCTCAGAGGCCAGCCTAGTCACTCACTC   |
| U-SSTs-12H-7  | 1-7             | GACCCGCTCCCCCAGAGTCGTTGCATGTTTCCGGTCTTGACC   |
| U-SSTs-12H-8  | 1-8             | TCAAAAATTCTATCTACAATGTTGAGGTATACGATGGCCTCA   |
| U-SSTs-12H-9  | 1-9             | TCAAGCATAGACTGAAGCCCTCTCTTTTTTATGTTTATAGAAA  |
| U-SSTs-12H-10 | 1-10            | CATGACCAAGAAGAGCCCAGTTGAGATTCTATCACTTAAGAG   |
| U-SSTs-12H-11 | 1-11            | TGGGCGGTGCTTGTCTATGCAGCTGTTGACTGGTGTGCCCCA   |
| U-SSTs-12H-12 | 1-12            | TTTATTGCTCCTCACGACACACAATTAAGTTCATACCCTAAT   |
| U-SSTs-12H-13 | 1-13            | CGCCTTGGGAAACATCAGGGAATACGACCCGCAATGAGTGTC   |
| U-SSTs-12H-14 | 1-14            | GGATTTGGAGTACTTCTTCAGTATGGCAACAGAATACATGAA   |
| U-SSTs-12H-15 | 2-1             | TTTTTTTTTTTGCACATAGCATCACGAGGCCATTTTTTTTTT   |
| U-SSTs-12H-16 | 2-2             | TTCAAAGACCATTTTCGTGTGACCCGCATAACTGCGGTGTCAT  |
| U-SSTs-12H-17 | 2-3             | GCCACCACTCTGAACTCGTATGCGGTCAGGCCTGTCATTAAG   |
| U-SSTs-12H-18 | 2-4             | GGACTCGTGTCAAACTCGAGGACCTCGAGCACAAACGTAGG    |
| U-SSTs-12H-19 | 2-5             | TAAGTCGCGTCTGACAGACACGGAGGAATCAGTTGAGAAGGT   |
| U-SSTs-12H-20 | 2-6             | TGATCATCGGTAACACGAACTAGTTAGAGTCGTTATTCGCTT   |
| U-SSTs-12H-21 | 2-7             | GTATCTAGACGTCCGCAACCAGGGAGCGGGTCTCTGAGATGT   |
| U-SSTs-12H-22 | 2-8             | CGGAGGTAGCGTACTATCAGAGAATTTTTGAACGACTCTGG    |
| U-SSTs-12H-23 | 2-9             | TCGTTCTGTGCCGCACGTTGTTCTATGCTTGACATTGTAGAT   |
| U-SSTs-12H-24 | 2-10            | CCGCTAATGTTGAGACTGCTCTCTTGGTCATGAGGGCTTCAG   |
| U-SSTs-12H-25 | 2-11            | AAAGGATGGGGATAAGCCAGAAGCACCGCCCAACTGGGCTCT   |
| U-SSTs-12H-26 | 2-12            | CGACCCATTCCGCGGTCCGCGGAGCAATAAATGCATAGACA    |
| U-SSTs-12H-27 | 2-13            | CAGGCTCCTAGGTCCGCTTCTTTCCCAAGGCGTGTGTCGTGA   |
| U-SSTs-12H-28 | 2-14            | TCCGAAAGTGGAATGGGTAGAACTCCAAATCCTCCCTGATGT   |
| U-SSTs-12H-29 | 2-15            | CATGGATATTTTTTTTTTTTTTTTTTTTTTTTTTCTGAAGAAGT |
| U-SSTs-12H-30 | 3-1             | TAGGCTTCTCGACCTCAGCCTGGTCTTTGAAATGCTATGTGC   |
| U-SSTs-12H-31 | 3-2             | CCTTTGGTGAAGTCTCACCTGAGTGGTGGCTCACACGAAAT    |
| U-SSTs-12H-32 | 3-3             | CAGTAAATTTAGGCCTAATGTACACGAGTCCATACGAGTTCA   |
| U-SSTs-12H-33 | 3-4             | ATGTCGCGACACAAAAGACCGACGCGACTTACTCGAGTTTTG   |
| U-SSTs-12H-34 | 3-5             | AGGGGTATGGCGCACTTGTGCCGATGATCAGTGTCTGTGTCAG  |
| U-SSTs-12H-35 | 3-6             | CAAAGAACTACGCCCTAAGCAGTCTAGATACAGTTCGTGTTA   |
| U-SSTs-12H-36 | 3-7             | AAGGATTGAAACAGCACCAAGTGCTACCTCCGTGGTTGCGGAC  |
| U-SSTs-12H-37 | 3-8             | CGCGGTCCGCCGCATCCAAACCACAGAACGACTGATAGTAGC   |
| U-SSTs-12H-38 | 3-9             | AAATATATTTTAAGTGGTAGGACATTAGCGGACAACGTGCGG   |
| U-SSTs-12H-39 | 3-10            | AAACCCAGGAATACTGCACACCCCATCCTTTGAGCAGTCTCA   |
| U-SSTs-12H-40 | 3-11            | ACCATCGCTAAGGGGATCGCCGAATGGGTTCGTCTGGCTTATC  |
| U-SSTs-12H-41 | 3-12            | TCCATCGAAAATATCCTAATCTAGGAGCCTGGCGCGACCGCG   |
| U-SSTs-12H-42 | 3-13            | CGTCCCGAACAGAATACAAATCACTTTCGGAAGAAGCGGACC   |
| U-SSTs-12H-43 | 3-14            | CTCCCCTTCCAGTGCGCGATGAATATCCATGTCTACCCATTC   |
| U-SSTs-12H-44 | 4-1             | TTTTTTTTTTTGGCCGATTAGCCGAGAAGCCTATTTTTTTTTT  |
| U-SSTs-12H-45 | 4-2             | TCCCCTTCCACCCGACGTGCCTACCAAAGGGAGGCTGAGGT    |
| U-SSTs-12H-46 | 4-3             | ACTTGGTGGAAGGCGCGTATAAATTTACTGAGGTGAGACT     |

| <b>Seq_ID</b> | <b>Location</b> | <b>Sequence</b>                              |
|---------------|-----------------|----------------------------------------------|
| U-SSTs-12H-47 | 4-4             | CGGGAAGTACGCTGACCCCTTTTGTGCGGACATACATTAGGCC  |
| U-SSTs-12H-48 | 4-5             | GATAGGGCAATGAGCTGGGAACCATAACCCCTCGGTCTTTTG   |
| U-SSTs-12H-49 | 4-6             | ATCCTATACTTACGCCAATGAGTAGTTCTTTGCACAAGTGCG   |
| U-SSTs-12H-50 | 4-7             | GCTGGCAATGGGGATTGCCAATTTCAATCCTTTGCTTAGGGC   |
| U-SSTs-12H-51 | 4-8             | GACCTTATATAGATTAACCGGGCGGACCGCGACTGGTGCTG    |
| U-SSTs-12H-52 | 4-9             | CTCATAATTTTCAAGCCCAAGAAAATATATTTGTTGGATGC    |
| U-SSTs-12H-53 | 4-10            | CAGGCAGTACAAATCGGGGCATTCTGGGTTTCTTACCCTT     |
| U-SSTs-12H-54 | 4-11            | AGAATAAATTGATATGACTCGTTAGCGATGGTGTGTGCAGTA   |
| U-SSTs-12H-55 | 4-12            | GTTAATGCACTGTAGATTTTTTTTTTCGATGGAGGCGATCCCC  |
| U-SSTs-12H-56 | 4-13            | CGTGCAGAAATGCGCCTCCCCCTGTTTCGGGACGGATTAGGATA |
| U-SSTs-12H-57 | 4-14            | GCTGGGGGTGTCAGAGGGCCCTGGAAGGGGAGATTTGTATTC   |
| U-SSTs-12H-58 | 4-15            | GAGTAAACTATTTTTTTTTTTTTTTTTTTTTTTCATCGCGCAC  |
| U-SSTs-12H-59 | 5-1             | TTATCGTTGAGGATACCTCTTTGGAAGGGGAGCTAATCGGCC   |
| U-SSTs-12H-60 | 5-2             | ATTCCGGCCGACCCGTACAGCCACCAAGGTGGCACGTCGGG    |
| U-SSTs-12H-61 | 5-3             | CAAGCCCAGCGGTAAGACAACCTAGTTCCCGTACGCCGCCTT   |
| U-SSTs-12H-62 | 5-4             | CCTACCCTATTTTTTAGACTATTGCCCTATCAAAGGGTCACG   |
| U-SSTs-12H-63 | 5-5             | TCGGCGCGGACCTCGAGTCAAGTATAGGATTTCCAGCTCA     |
| U-SSTs-12H-64 | 5-6             | AGAACTCTGGCCCAAACAGTACATTGCCAGCTCATTGGCGTA   |
| U-SSTs-12H-65 | 5-7             | TCTATCAGTCTTCCGCGATCCATATAAGGTCTTGGCAATCCC   |
| U-SSTs-12H-66 | 5-8             | ATAGGACAGCATCAGTCTCCTAAATTATGAGCCGGTTAATCT   |
| U-SSTs-12H-67 | 5-9             | ACTAGTGCGGGCTTGCCGAGGTACTGCCTGCTTGGGCTTGA    |
| U-SSTs-12H-68 | 5-10            | ATCGCGATGAAGTCCCCGATAATTTATTTCTTGCCCCGATTT   |
| U-SSTs-12H-69 | 5-11            | ACTTGGCCATATTAACGCTTGTGCATTAACCGAGTCATATC    |
| U-SSTs-12H-70 | 5-12            | CACACGTCCGGCAGGAGGATTTCTGCACGAAAAATCTACA     |
| U-SSTs-12H-71 | 5-13            | CTGCAGGACATTGCCGGCCGGAACCCCCAGCGGGGGAGGCGC   |
| U-SSTs-12H-72 | 5-14            | GCGTCGTGGTGGGAAGTATTGTAGTTTACTCGGGCCCTCTGC   |
| U-SSTs-12H-73 | 6-1             | TTTTTTTTTTTATAGTACACCCTCAACGATAATTTTTTTTTTT  |
| U-SSTs-12H-74 | 6-2             | TTTAGGTTTCCCTGTTGTGCGACGCGCCGGAATAAGAGGTATC  |
| U-SSTs-12H-75 | 6-3             | CTAGTCTCGAAATCTGGCGGACGCTGGGCTTGTGTACGGCT    |
| U-SSTs-12H-76 | 6-4             | TTGGGTAGTTACGGATAATGGAATAGGGTAGGGTTGTCTTAC   |
| U-SSTs-12H-77 | 6-5             | ACACGGCCGCGAGAATACGCCTCGCGCGCCGATAGTCTAAAA   |
| U-SSTs-12H-78 | 6-6             | GAACTCTTACTGGGAATCAACGCCAGAGTTCTTGACTCGAGG   |
| U-SSTs-12H-79 | 6-7             | TGACATCTGGTGTTCGGAAGCAGACTGATAGATACTGTTTGG   |
| U-SSTs-12H-80 | 6-8             | TCGGGATGGTTTCCATTCTCATGCTGTCTTATGGATCGCGGA   |
| U-SSTs-12H-81 | 6-9             | CTATTAGTTTTGAGTGACCGTCCCGCACTAGTAGGAGACTGA   |
| U-SSTs-12H-82 | 6-10            | CTTCCGCCGTTCTCGCAGTGCTTCATCGCGATCTGCGGCAAG   |
| U-SSTs-12H-83 | 6-11            | TTAGCAGGTATCTCCTACCTTTATGGCCAAGTATCGGGGGAC   |
| U-SSTs-12H-84 | 6-12            | GGACGGATGGTTAGGTACTGGCCCGACGTGTGAAGCGTTTAA   |
| U-SSTs-12H-85 | 6-13            | CGAGCGATCTAGAGAATGATCATGTCTTGCAGACTCCTCGTG   |
| U-SSTs-12H-86 | 6-14            | AGTGACGGTGAATTTATTTGCTCACCACGACGCCCGCCGGCA   |
| U-SSTs-12H-87 | 6-15            | ACCCGAGAGCTTTTTTTTTTTTTTTTTTTTTTTTCAATACTTCC |
| U-SSTs-12H-88 | 7-1             | GCAGTGTATGGACGCTGGAAGGAAACCTAAAGGTGTACTATA   |
| U-SSTs-12H-89 | 7-2             | ACCTTAACTGTAAGTAATATGTGCGAGACTAGGTCGACAACAG  |
| U-SSTs-12H-90 | 7-3             | ATATCTTACCGGACGACGCTAAACTACCCAATCCGCCAGATT   |
| U-SSTs-12H-91 | 7-4             | CATCCTTTGCTCACTACAAGTGCGGCCGTGTCCATTATCCGT   |
| U-SSTs-12H-92 | 7-5             | ATCTGTTCTTCCCTCAAGGTTGTAAGAGTTCGGCGTATTCTC   |
| U-SSTs-12H-93 | 7-6             | CGTGGGATTACAGCCGGTTTGCCAGATGTCAGTTGATTCCCA   |

| <b>Seq_ID</b>  | <b>Location</b> | <b>Sequence</b>                               |
|----------------|-----------------|-----------------------------------------------|
| U-SSTs-12H-94  | 7-7             | ACCGTCCTCTCGACCTTCCCAACCATCCCGAGCTTCCGAACA    |
| U-SSTs-12H-95  | 7-8             | GTGGTACCTCCGCAGGTTGTCAAATAATAGTGAGAAATGGAA    |
| U-SSTs-12H-96  | 7-9             | AGTGATTGACTGAGTGGCCTCACGGCGGAAGACGGTCACTCA    |
| U-SSTs-12H-97  | 7-10            | CGTGCTAAAAATGCCTTGAGGTACCTGCTAAGCACTGCGAGA    |
| U-SSTs-12H-98  | 7-11            | TAAGTGGTTTTAAAACGCCGTCCCATCCGTCCAAGGTAGGAGA   |
| U-SSTs-12H-99  | 7-12            | ACAATACTTAGTTCGAATCAGAAGATCGCTCGCCAGTACCTAA   |
| U-SSTs-12H-100 | 7-13            | CATATGCCCAAACATTCTACCCACCGTCACTGATCATTTCTCT   |
| U-SSTs-12H-101 | 7-14            | GCTGATCATAATCATCGTTCGGCTCTCGGGTAGCAATAAATT    |
| U-SSTs-12H-102 | 8-1             | TTTTTTTTTTTGTGAGGTTAGTCCATACTGCTTTTTTTTTTT    |
| U-SSTs-12H-103 | 8-2             | GACAGGAAGGGCCTAACAGTCACAGTTAAGGTCTTCCAGCGT    |
| U-SSTs-12H-104 | 8-3             | TCGCGAGTAATCTACCTCCTACGGTAAGATATCATATTACTT    |
| U-SSTs-12H-105 | 8-4             | ACGAGCGGCCAGTGTACCTTTAGCAAAGGATGTAGCGTCGTC    |
| U-SSTs-12H-106 | 8-5             | CGGAGCTTTTGCCCTACATATGAAGAACAGATACTTGTAGTG    |
| U-SSTs-12H-107 | 8-6             | CGAGAAAATGGCCACGACACTGTAATCCACGAACCTTGAGG     |
| U-SSTs-12H-108 | 8-7             | AGCAGTCACTCGCAGTATCGCGAGAGGACGGTCAAACCGGCT    |
| U-SSTs-12H-109 | 8-8             | GCGACCGAAAATCCCGGTGCTGGAGGTACCACTGGGAAGGTC    |
| U-SSTs-12H-110 | 8-9             | ACGCCTGCGCGGTGAGGGTCAATCACTGACAACCTGC         |
| U-SSTs-12H-111 | 8-10            | TCGCGACTTTAGAAGGTATCGTTTTTTAGCACGGAGGCCACTC   |
| U-SSTs-12H-112 | 8-11            | GAACGAAGATAGTGCTATGTTTAAACCACTTACCTCAAGGCA    |
| U-SSTs-12H-113 | 8-12            | GGCTCTCGCGGTACAGCCACTCTAAGTATTGTGACGGCGTTT    |
| U-SSTs-12H-114 | 8-13            | TGAATCTAAGGGCCCTGCGGGTTGGGCATATGTCTGATTCTGA   |
| U-SSTs-12H-115 | 8-14            | CACGCGGGCATGGGTGTTTTATTATGATCAGCGGTAGAATGT    |
| U-SSTs-12H-116 | 8-15            | TTGGCGGATTTTTTTTTTTTTTTTTTTTTTTTCGAACGATGA    |
| U-SSTs-12H-117 | 9-1             | TCATTACAGGGTTTTGTCTAATCCTTCCGTGCTACTAACCTCAC  |
| U-SSTs-12H-118 | 9-2             | GATTACATGCCAGAAAATAGTTTACTCGCGAGACTGTTAGGC    |
| U-SSTs-12H-119 | 9-3             | AGGCTCTAACGCCGTGCTCCCGGCCGCTCGTTAGGAGGTAGA    |
| U-SSTs-12H-120 | 9-4             | GTTAACTGGCAATCTACTGACAAAAGCTCCGAAAGGTACACT    |
| U-SSTs-12H-121 | 9-5             | CGCATGTGCTCGCGGCCCATCCATTTTCTCGATATGTAGGGC    |
| U-SSTs-12H-122 | 9-6             | GGAACAAATTCACATACTCGCAGTACTGCTAGTGTCTGTTGGC   |
| U-SSTs-12H-123 | 9-7             | ACCGCCGAGTCCAAGCCGTGCTTTCGGTTCGCGGATACTGCG    |
| U-SSTs-12H-124 | 9-8             | TCGATTTGTCAGCAGAACTCTGCGCAGGCGTAGCACCGGGGA    |
| U-SSTs-12H-125 | 9-9             | CGATCGCAAGACTTATCCGGCAAAGTCGCGAGACCCCTGACC    |
| U-SSTs-12H-126 | 9-10            | CGACAGTGACCAACGCCTCCCATCTTCGTTCCGATACCTTCT    |
| U-SSTs-12H-127 | 9-11            | ATTTTCTGTAACACGCGCTGCGCGAGAGCCAACATAGCACT     |
| U-SSTs-12H-128 | 9-12            | GTCTCGATAAGATCAGGCCGTCTTAGATTCAAGTGGCTGTAC    |
| U-SSTs-12H-129 | 9-13            | GTGGCCAACACATCGTGAAATTGCCCGCGTGCCCGCAGGCC     |
| U-SSTs-12H-130 | 9-14            | TTCGAGCTCGACAGTGAGCTAATCGCGCCAATAAAAACACCCA   |
| U-SSTs-12H-131 | 10-1            | TTTTTTTTTTTTCGCGCCATCGCGCCCTGTAATGATTTTTTTTTT |
| U-SSTs-12H-132 | 10-2            | ATTCTCATTATGGGACGGGGGGGCATGTAATCATTAGACAAA    |
| U-SSTs-12H-133 | 10-3            | GCATGATGTACAGGAAGGGAGCGTTAGAGCCTACTATTTTCT    |
| U-SSTs-12H-134 | 10-4            | CGGAGAAGAGGAATATGTGCGTGCCAGTTAACGGGACGACGG    |
| U-SSTs-12H-135 | 10-5            | GAACAGTCTTTCCAAAGCGTCGACGACATGCGGTGAGTAGAT    |
| U-SSTs-12H-136 | 10-6            | GTCTAACGCAAGTAAGGTAATGAATTTGTTCCGATGGGCCGC    |
| U-SSTs-12H-137 | 10-7            | TTATAGCTATGGGGGAGAACAGACTCGGCGGTGCGAGTATGT    |
| U-SSTs-12H-138 | 10-8            | TCATTTGATTCTGCTTAGGTTTGACAAAATCGAGCACGGCTTG   |
| U-SSTs-12H-139 | 10-9            | GTTGGGGCATCTTTCGTACGGTCTTTCGATCGAGAGTTCTGC    |
| U-SSTs-12H-140 | 10-10           | TGCGGACCTTTACAAATCCCGGTCACTGTTCGGCCGGATAAG    |



**U-SSTs-6H**

| <b>Seq_ID</b> | <b>Location</b> | <b>Sequence</b>                                |
|---------------|-----------------|------------------------------------------------|
| U-SSTs-6H-1   | 1-1             | TGGGCCTCGTGATGACACCGCGAAACCTAAAGGTGTA CTATA    |
| U-SSTs-6H-2   | 1-2             | AGTTATGCGGGCTTAATGACATCGAGACTAGGTCGACAACAG     |
| U-SSTs-6H-3   | 1-3             | GGCCTGACCGCCCTACGTTTGA ACTACCCAATCCGCCAGATT    |
| U-SSTs-6H-4   | 1-4             | TGCTCGAGGTCACCTTCTCAAGCGGCCGTGCCATTATCCGT      |
| U-SSTs-6H-5   | 1-5             | CTGATTCCCTCCAAGCGAATAAGTAAGAGTTCGGCGTATTCTC    |
| U-SSTs-6H-6   | 1-6             | CGACTCTAACTACATCTCAGACCAGATGTCAGTTGATTCCCA     |
| U-SSTs-6H-7   | 1-7             | GACCCGCTCCCCCAGAGTCGTACCATCCCGAGCTTCCGAACA     |
| U-SSTs-6H-8   | 1-8             | TCAAAAATTCTATCTACAATGAAACTAATAGTGAGAATGGAA     |
| U-SSTs-6H-9   | 1-9             | TCAAGCATAGACTGAAGCCCTACGGCGGAAGACGGTCACTCA     |
| U-SSTs-6H-10  | 1-10            | CATGACCAAGAAGAGCCAGTTACCTGCTAAGCACTGCGAGA      |
| U-SSTs-6H-11  | 1-11            | TGGGCGGTGCTTGTCTATGCACCATCCGTCCAAGGTAGGAGA     |
| U-SSTs-6H-12  | 1-12            | TTTATTGCTCCTCACGACACAAGATCGCTCGCCAGTACCTAA     |
| U-SSTs-6H-13  | 1-13            | CGCCTTGGGAAACATCAGGGACACCGTCACTGATCATTCTCT     |
| U-SSTs-6H-14  | 1-14            | GGATTTGGAGTACTTCTTCAGGCTCTCGGGTAGCAATAAATT     |
| U-SSTs-6H-15  | 2-1             | TTTTTTTTTTTGCACATAGCATCACGAGGCCATTTTTTTTTT     |
| U-SSTs-6H-16  | 2-2             | TTCAAAGACCATTTTCGTGTGACCCGCATAACTGCGGTGTCAT    |
| U-SSTs-6H-17  | 2-3             | GCCACCCTCTGAACTCGTATGCGGTCAGGCCTGTCATTAAG      |
| U-SSTs-6H-18  | 2-4             | GGACTCGTGTCAAAACTCGAGGACCTCGAGCACAAACGTAGG     |
| U-SSTs-6H-19  | 2-5             | TAAGTCGCGTCTGACAGACACGGAGGAATCAGTTGAGAAGGT     |
| U-SSTs-6H-20  | 2-6             | TGATCATCGGTAAACACGAACTAGTTAGAGTCGTTATTTCGCTT   |
| U-SSTs-6H-21  | 2-7             | GTATCTAGACGTCCGCAACCAGGGAGCGGGTCTCTGAGATGT     |
| U-SSTs-6H-22  | 2-8             | CGGAGGTAGCGCTACTATCAGAGAATTTTTGAACGACTCTGG     |
| U-SSTs-6H-23  | 2-9             | TCGTTCTGTGCCGCACGTTGTTCTATGCTTGACATTGTAGAT     |
| U-SSTs-6H-24  | 2-10            | CCGCTAATGTTGAGACTGCTCTCTTGGTCATGAGGGCTTCAG     |
| U-SSTs-6H-25  | 2-11            | AAAGGATGGGGATAAGCCAGAAGCACCGCCCAACTGGGCTCT     |
| U-SSTs-6H-26  | 2-12            | CGACCCATTCCGCGGTGCGCGGAGCAATAAATGCATAGACA      |
| U-SSTs-6H-27  | 2-13            | CAGGCTCCTAGGTCGCTTCTTTCCCAAGGCGTGTGTCGTGA      |
| U-SSTs-6H-28  | 2-14            | TCCGAAAGTGGAATGGGTAGAACTCCAAATCCTCCCTGATGT     |
| U-SSTs-6H-29  | 2-15            | CATGGATATTTTTTTTTTTTTTTTTTTTTTTTTTTTCTGAAGAAGT |
| U-SSTs-6H-30  | 3-1             | TAGGCTTCTCGACCTCAGCCTGGTCTTTGAAATGCTATGTGC     |
| U-SSTs-6H-31  | 3-2             | CCCTTTGGTGAAGTCTCACCTGAGTGGTGGCTCACACGAAAT     |
| U-SSTs-6H-32  | 3-3             | CAGTAAATTTAGGCCTAATGTACACGAGTCATACGAGTTCA      |
| U-SSTs-6H-33  | 3-4             | ATGTCGCGACACAAAAGACCGACGCGACTTACTCGAGTTTTG     |
| U-SSTs-6H-34  | 3-5             | AGGGGGTATGGCGCACTTGTGCCGATGATCAGTGTCTGTCAG     |
| U-SSTs-6H-35  | 3-6             | CAAAGAACTACGCCCTAAGCAGTCTAGATACAGTTCGTGTTA     |
| U-SSTs-6H-36  | 3-7             | AAGGATTGAAACAGCACCCAGTGCTACCTCCGTGGTTGCGGAC    |
| U-SSTs-6H-37  | 3-8             | CGCGGTCCGCCGCATCCAAACCACAGAACGACTGATAGTAGC     |
| U-SSTs-6H-38  | 3-9             | AAATATATTTTAAGTGGTAGGACATTAGCGGACAACGTGCGG     |
| U-SSTs-6H-39  | 3-10            | AAACCCAGGAATACTGCACACCCCATCCTTTGAGCAGTCTCA     |
| U-SSTs-6H-40  | 3-11            | ACCATCGCTAAGGGGATCGCCGAATGGGTGCTCTGGCTTATC     |
| U-SSTs-6H-41  | 3-12            | TCCATCGAAAAATATCCTAATCTAGGAGCCTGGCGCGACCGCG    |
| U-SSTs-6H-42  | 3-13            | CGTCCCGAACAGAATACAAATCACTTTCGGAAGAAGCGGACC     |
| U-SSTs-6H-43  | 3-14            | CTCCCCTTCCAGTGC GCGATGAATATCCATGTCTACCCATTC    |
| U-SSTs-6H-44  | 4-1             | TTTTTTTTTTTGGCCGATTAGCCGAGAAGCCTATTTTTTTTTT    |
| U-SSTs-6H-45  | 4-2             | TCCCCTTCCACCCGACGTGCCTCACCAAAGGGAGGCTGAGGT     |
| U-SSTs-6H-46  | 4-3             | ACCTTGGTGAAGGCGGCGTATAAATTTACTGAGGTGAGACT      |



**U-SSTs-4H**

| <b>Seq_ID</b> | <b>Location</b> | <b>Sequence</b>                                |
|---------------|-----------------|------------------------------------------------|
| U-SSTs-4H-1   | 1-1             | TGGGCTCGTGATGACACCGCTGGAAGGGGAGCTAATCGGCC      |
| U-SSTs-4H-2   | 1-2             | AGTTATGCGGGCTTAATGACACCACCAAGGTGGCACGTCGGG     |
| U-SSTs-4H-3   | 1-3             | GGCCTGACCGCCCTACGTTTGCTAGTTCCCCTACGCCGCCTT     |
| U-SSTs-4H-4   | 1-4             | TGCTCGAGGTCACCTTCTCAATTGCCCTATCAAAGGGTCACG     |
| U-SSTs-4H-5   | 1-5             | CTGATTCCCTCCAAGCGAATAAAGTATAGGATTTCCAGCTCA     |
| U-SSTs-4H-6   | 1-6             | CGACTCTAACTACATCTCAGACATTGCCAGCTCATTGGCGTA     |
| U-SSTs-4H-7   | 1-7             | GACCCGCTCCCCCAGAGTCGTATATAAGGTCTTGGCAATCCC     |
| U-SSTs-4H-8   | 1-8             | TCAAAAATTCTATCTACAATGAAATTATGAGCCGGTTAATCT     |
| U-SSTs-4H-9   | 1-9             | TCAAGCATAGACTGAAGCCCTGTACTGCCTGCTTGGGCTTGA     |
| U-SSTs-4H-10  | 1-10            | CATGACCAAGAAGAGCCCAGTAATTTATTCTTGCCCCGATTT     |
| U-SSTs-4H-11  | 1-11            | TGGGCGGTGCTTGTCTATGCAGTGCATTAACCGAGTCATATC     |
| U-SSTs-4H-12  | 1-12            | TTTATTGCTCCTCACGACACAATTCTGCACGAAAAATCTACA     |
| U-SSTs-4H-13  | 1-13            | CGCCTTGGGAAACATCAGGGAAACCCCCAGCGGGGGAGGCGC     |
| U-SSTs-4H-14  | 1-14            | GGATTTGGAGTACTTCTTCAGTAGTTTACTCGGGCCCTCTGC     |
| U-SSTs-4H-15  | 2-1             | TTTTTTTTTTTGCACATAGCATCACGAGGCCATTTTTTTTTT     |
| U-SSTs-4H-16  | 2-2             | TTCAAAGACCATTTTCGTGTGACCCGCATAACTGCGGTGTCAT    |
| U-SSTs-4H-17  | 2-3             | GCCACCCTCTGAACTCGTATGCGGTCAGGCCTGTCATTAAG      |
| U-SSTs-4H-18  | 2-4             | GGACTCGTGTCAAACTCGAGGACCTCGAGCACAAACGTAGG      |
| U-SSTs-4H-19  | 2-5             | TAAGTCGCGTCTGACAGACACGGAGGAATCAGTTGAGAAGGT     |
| U-SSTs-4H-20  | 2-6             | TGATCATCGGTAAACACGAACTAGTTAGAGTCGTTATTTCGCTT   |
| U-SSTs-4H-21  | 2-7             | GTATCTAGACGTCCGCAACCAGGGAGCGGGTCTCTGAGATGT     |
| U-SSTs-4H-22  | 2-8             | CGGAGGTAGCGCTACTATCAGAGAATTTTTGAACGACTCTGG     |
| U-SSTs-4H-23  | 2-9             | TCGTTCTGTGCCGCACGTTGTTCTATGCTTGACATTGTAGAT     |
| U-SSTs-4H-24  | 2-10            | CCGCTAATGTTGAGACTGCTCTCTTGGTCATGAGGGCTTCAG     |
| U-SSTs-4H-25  | 2-11            | AAAGGATGGGGATAAGCCAGAAGCACCGCCCAACTGGGCTCT     |
| U-SSTs-4H-26  | 2-12            | CGACCCATTCCGCGGTGCGCGGAGCAATAAATGCATAGACA      |
| U-SSTs-4H-27  | 2-13            | CAGGCTCCTAGGTCGCTTCTTTCCCAAGGCGTGTGTCTGTA      |
| U-SSTs-4H-28  | 2-14            | TCCGAAAGTGGAATGGGTAGAACTCCAAATCCTCCCTGATGT     |
| U-SSTs-4H-29  | 2-15            | CATGGATATTTTTTTTTTTTTTTTTTTTTTTTTTTTCTGAAGAAGT |
| U-SSTs-4H-30  | 3-1             | TAGGCTTCTCGACCTCAGCCTGGTCTTTGAAATGCTATGTGC     |
| U-SSTs-4H-31  | 3-2             | CCCTTTGGTGAAGTCTCACCTGAGTGGTGGCTCACACGAAAT     |
| U-SSTs-4H-32  | 3-3             | CAGTAAATTTAGGCCTAATGTACACGAGTCCATACGAGTTCA     |
| U-SSTs-4H-33  | 3-4             | ATGTCGCGACACAAAGACCGACGCGACTTACTCGAGTTTTG      |
| U-SSTs-4H-34  | 3-5             | AGGGGGTATGGCGCACTTGTGCCGATGATCAGTGTCTGTCAG     |
| U-SSTs-4H-35  | 3-6             | CAAAGAACTACGCCCTAAGCAGTCTAGATACAGTTCGTGTTA     |
| U-SSTs-4H-36  | 3-7             | AAGGATTGAAACAGCACCAAGTGTACCTCCGTGGTTGCGGAC     |
| U-SSTs-4H-37  | 3-8             | CGCGGTCCGCCGCATCCAAACCACAGAACGACTGATAGTAGC     |
| U-SSTs-4H-38  | 3-9             | AAATATATTTTAAGTGGTAGGACATTAGCGGACAACGTGCGG     |
| U-SSTs-4H-39  | 3-10            | AAACCAGGAATACTGCACACCCCATCCTTTGAGCAGTCTCA      |
| U-SSTs-4H-40  | 3-11            | ACCATCGCTAAGGGGATCGCCGAATGGGTGCTCTGGCTTATC     |
| U-SSTs-4H-41  | 3-12            | TCCATCGAAAAATATCCTAATCTAGGAGCCTGGCGCGACCGCG    |
| U-SSTs-4H-42  | 3-13            | CGTCCCGAACAGAATACAAATCACTTTCGGAAGAAGCGGACC     |
| U-SSTs-4H-43  | 3-14            | CTCCCCTTCCAGTGC GCGATGAATATCCATGTCTACCCATTC    |
| U-SSTs-4H-44  | 4-1             | TTTTTTTTTTTGGCCGATTAGCCGAGAAGCCTATTTTTTTTTT    |
| U-SSTs-4H-45  | 4-2             | TCCCCTTCCACCCGACGTGCCTCACCAAAGGGAGGCTGAGGT     |
| U-SSTs-4H-46  | 4-3             | ACCTTGGTGAAGGCGGCGTATAAATTTACTGAGGTGAGACT      |







**U-SSTs-2Hx10C**

| <b>Seq_ID</b>         | <b>Location</b> | <b>Sequence</b>                                      |
|-----------------------|-----------------|------------------------------------------------------|
| U-SSTs-2H-10Column-1  | 1-1             | TGGTGGGACGTCTGTCTTCGTGACATGCATAACCTCAGTCGC           |
| U-SSTs-2H-10Column-2  | 1-2             | CGAACGGTTTGTCTGTACGCGAGTCAGTATACTACTAATGT            |
| U-SSTs-2H-10Column-3  | 1-3             | TGATTCCTCATCGTGGTGTCCGTTATGCGTAAGACCGGTACA           |
| U-SSTs-2H-10Column-4  | 1-4             | AGCAGATTGCCTGGCATGGCGAGCTTACCTCGTGGTCCGGTA           |
| U-SSTs-2H-10Column-5  | 1-5             | TCTGCAGGTGAGCCGCCCGGTGGGCATGGTTCGCAGAGAC             |
| U-SSTs-2H-10Column-6  | 1-6             | ATTTAGGCGTGCGCGAACTCGGCCAGCCCTTGATCGTCCGC            |
| U-SSTs-2H-10Column-7  | 1-7             | CTCGTTCTGCACATGTTGCCCTGCCTGGGCACACCTTTACAA           |
| U-SSTs-2H-10Column-8  | 1-8             | TAGTTCCTACTCCACACTGCTATGTCCTGAGAAATGATACCC           |
| U-SSTs-2H-10Column-9  | 1-9             | TATGCTCCTATAGAAAGACTTGTAGATGGTCTATTTACTGAA           |
| U-SSTs-2H-10Column-10 | 1-10            | GTGTAAGAGATttttttttttttttttttttttttttttttTGGCTGAGTGC |
| U-SSTs-2H-10Column-11 | 2-1             | tttttttttttGCGACTGAGGTACGTCCCACCAttttttttttt         |
| U-SSTs-2H-10Column-12 | 2-2             | TATGCATGTCACATTAGTAGTCAAACCGTTCGACGAAGACAG           |
| U-SSTs-2H-10Column-13 | 2-3             | ATACTGACTCTGTACCGGTCTATGAGGAATCAGCGTGACAGA           |
| U-SSTs-2H-10Column-14 | 2-4             | TACGCATAACTACCCGACCACGGCAATCTGCTGGACACCACG           |
| U-SSTs-2H-10Column-15 | 2-5             | GAGGTAAGCTGTCTCTGCGAATCACCTGCAGACGCCATGCCA           |
| U-SSTs-2H-10Column-16 | 2-6             | CCATGCCACGCGGACGATCACACGCCTAAATCGGCGGCGGC            |
| U-SSTs-2H-10Column-17 | 2-7             | AGGGCTGGGCTTGTAAGGTGTGCAGAACGAGCGAGTTCGCG            |
| U-SSTs-2H-10Column-18 | 2-8             | TGCCCAGGCAGGGTATCATTTAGTAGGAACTAGGGCAACATG           |
| U-SSTs-2H-10Column-19 | 2-9             | CTCAGGACATTTTCAGTAAATAATAGGAGCATAAGCAGTGTGG          |
| U-SSTs-2H-10Column-20 | 2-10            | GACCATCTACGCACTCAGCCAATCTCTTACACAAGTCTTTCT           |

**U-SSTs-2Hx30C**

| <b>Seq_ID</b>         | <b>Location</b> | <b>Sequence</b>                                      |
|-----------------------|-----------------|------------------------------------------------------|
| U-SSTs-2H-30Column-1  | 1-1             | TGGTGGGACGTCTGTCTTCGTGACATGCATAACCTCAGTCGC           |
| U-SSTs-2H-30Column-2  | 1-2             | CGAACGGTTTTGTCTGTACGCGAGTCAGTATACTACTAATGT           |
| U-SSTs-2H-30Column-3  | 1-3             | TGATTCCCTCATCGTGGTGTCCGTTATGCGTAAGACCGGTACA          |
| U-SSTs-2H-30Column-4  | 1-4             | AGCAGATTGCCTGGCATGGCGAGCTTACCTCGTGGTCCGGTA           |
| U-SSTs-2H-30Column-5  | 1-5             | TCTGCAGGTGAGCCGCCCGGTGGGCATGGTTCGCAGAGAC             |
| U-SSTs-2H-30Column-6  | 1-6             | ATTTAGGCGTGCGCGAACTCGGCCAGCCCTTGATCGTCCGC            |
| U-SSTs-2H-30Column-7  | 1-7             | CTCGTTCTGCACATGTTGCCCTGCCTGGGCACACCTTTACAA           |
| U-SSTs-2H-30Column-8  | 1-8             | TAGTTCCTACTCCACACTGCTATGTCCTGAGAAATGATACC            |
| U-SSTs-2H-30Column-9  | 1-9             | TATGCTCCTATAGAAAGACTTGTAGATGGTCTATTTACTGAA           |
| U-SSTs-2H-30Column-10 | 1-10            | GTGTAAGAGATACAGATATCAGAGATTAAAGTGGCTGAGTGC           |
| U-SSTs-2H-30Column-11 | 1-11            | CGCGTCCCTGGGATGGAAATCTCATGCGGTCCAAAGCAGGCT           |
| U-SSTs-2H-30Column-12 | 1-12            | GGTTTGGATTCCGAAACAACCGAAATCGCGAGCGCCACGAGC           |
| U-SSTs-2H-30Column-13 | 1-13            | CTTTACGGCAGTAAACGGAAACTAATGGATCCTCATATCCGT           |
| U-SSTs-2H-30Column-14 | 1-14            | CATAATTAGTACTGCCGGCCTGGCCTACGTCCGCTATTACGA           |
| U-SSTs-2H-30Column-15 | 1-15            | TATATAGACACAAGGTGCCACTAGGACTTCCGCCTCCGGTAA           |
| U-SSTs-2H-30Column-16 | 1-16            | GTCCACTTATGACGAAAGTGAATCGGCCAATAGTGCTGGTG            |
| U-SSTs-2H-30Column-17 | 1-17            | CCGTAAATGGGCATTAACTCGCCTTTCCGTAAACTGACTGCC           |
| U-SSTs-2H-30Column-18 | 1-18            | GACGGGCATGAGGCTGACTCCGCCCGTACCCGTTTGACAAC            |
| U-SSTs-2H-30Column-19 | 1-19            | GATTATTTGATACTGCTCGTGCCACATTCAACTCTTGAGGAA           |
| U-SSTs-2H-30Column-20 | 1-20            | ACCTCTCGGGCCGAGCCTCTTCACCTAAAGTGTCCCTTCTC            |
| U-SSTs-2H-30Column-21 | 1-21            | GCTATGGTTTTAGACCTTGCCCTGCGTGAGAGAGCGGATTTGGT         |
| U-SSTs-2H-30Column-22 | 1-22            | GGCCCGCACCCCTTACGTGACACGCAACAGAGTCGAATAGAAT          |
| U-SSTs-2H-30Column-23 | 1-23            | CTAACTGCTCACAGACATCGTAGCGGGACGGGCTCCTTGCTT           |
| U-SSTs-2H-30Column-24 | 1-24            | GCCTGTGAGAAGTACGTTACATCAACCTAACATCTTCAGGAT           |
| U-SSTs-2H-30Column-25 | 1-25            | AAGCAAATTCACGGGCCTCAACTGATTTAGCGGCTATGGCCC           |
| U-SSTs-2H-30Column-26 | 1-26            | AGTTGTGGGACTGGGCTCTCGCGGCGACGAACGTTAGAACTC           |
| U-SSTs-2H-30Column-27 | 1-27            | CAAAGACATATGGGACAACACTGAGTCCCGGATATCCCTGAC           |
| U-SSTs-2H-30Column-28 | 1-28            | CATCTCCGCTGAGTTATTGTACCGAACATGTGGTTGGTTACA           |
| U-SSTs-2H-30Column-29 | 1-29            | TGTTACCTGCCTAAGCCATCATTTGGGCTCACCGTGCCGCGTG          |
| U-SSTs-2H-30Column-30 | 1-30            | CGGGTCACCACttttttttttttttttttttttttttttttGCTTGAACAAG |
| U-SSTs-2H-30Column-31 | 2-1             | ttttttttttttGCGACTGAGGTACGTCCCACCAttttttttttt        |
| U-SSTs-2H-30Column-32 | 2-2             | TATGCATGTCACATTAGTAGTCAAACCGTTCGACGAAGACAG           |
| U-SSTs-2H-30Column-33 | 2-3             | ATACTGACTCTGTACCGGTCTATGAGGAATCAGCGTGACAGA           |
| U-SSTs-2H-30Column-34 | 2-4             | TACGCATAACTACCCGACCACGGCAATCTGCTGGACACCACG           |
| U-SSTs-2H-30Column-35 | 2-5             | GAGGTAAGCTGTCCTGCGAATCACCTGCAGACGCCATGCCA            |
| U-SSTs-2H-30Column-36 | 2-6             | CCATGCCACGCGGACGATCACACGCCTAAATCGGCGGGCGGC           |
| U-SSTs-2H-30Column-37 | 2-7             | AGGGCTGGGCTTGTAAGGTGTGCAGAACGAGCGAGTTCGCG            |
| U-SSTs-2H-30Column-38 | 2-8             | TGCCAGGCAGGGTATCATTTAGTAGGAACTAGGGCAACATG            |
| U-SSTs-2H-30Column-39 | 2-9             | CTCAGGACATTTTCAGTAAATAATAGGAGCATAAGCAGTGTGG          |
| U-SSTs-2H-30Column-40 | 2-10            | GACCATCTACGCACTCAGCCAATCTCTTACACAAGTCTTTCT           |
| U-SSTs-2H-30Column-41 | 2-11            | CTTTAATCTCAGCCTGCTTTGCCAGGGACGCGTGATATCTGT           |
| U-SSTs-2H-30Column-42 | 2-12            | GACCGCATGAGCTCGTGGCGGAATCCAAACCGATTTCCATC            |
| U-SSTs-2H-30Column-43 | 2-13            | TCGCGATTTACGGATATGAGCTGCCGTAAAGGGTTGTTTCG            |
| U-SSTs-2H-30Column-44 | 2-14            | GATCCATTAGTCGTAATAGCGTACTAATTATGTTTTCCGTTTA          |
| U-SSTs-2H-30Column-45 | 2-15            | GACGTAGGCCTTACCGGAGGCGTGTCTATATAAGGCCGGCAG           |
| U-SSTs-2H-30Column-46 | 2-16            | GGAAGTCCTACACCAGCACTACATAAGTGGACGTGGCACCTT           |

| <b>Seq_ID</b>         | <b>Location</b> | <b>Sequence</b>                             |
|-----------------------|-----------------|---------------------------------------------|
| U-SSTs-2H-30Column-47 | 2-17            | TTGGCCGATTGGCAGTCAGTTCCCATTTACGGACACTTTCGT  |
| U-SSTs-2H-30Column-48 | 2-18            | TACGGAAAGGAGTTGTCAAATCATGCCCGTCCGAGTTAATG   |
| U-SSTs-2H-30Column-49 | 2-19            | GGGTACGGGCTTCCTCAAGAGATCAAATAATCGGAGTCAGCC  |
| U-SSTs-2H-30Column-50 | 2-20            | TTGAATGTGGGAGAAGGGACAGCCCGAGAGGTCACGAGCAGT  |
| U-SSTs-2H-30Column-51 | 2-21            | CTTTAGGTGAACCAAATCCGCTAAACCATAGCAGAGGCTGCG  |
| U-SSTs-2H-30Column-52 | 2-22            | TCTCTCACGCATTCTATTTCGAGGGTGCGGGCCAGGCAAGGTC |
| U-SSTs-2H-30Column-53 | 2-23            | CTCTGTTGCGAAGCAAGGAGCTGAGCAGTTAGTGTCACGTAA  |
| U-SSTs-2H-30Column-54 | 2-24            | CCGTCCCCTATCCTGAAGATTTCTGACAGGCACGATGTCTG   |
| U-SSTs-2H-30Column-55 | 2-25            | GTTAGGTTGAGGGCCATAGCCTGAATTTGCTTTGTAACGTAC  |
| U-SSTs-2H-30Column-56 | 2-26            | GCTAAATCAGGAGTTCTAACGGTCCCACAACCTTTGAGGCCCG |
| U-SSTs-2H-30Column-57 | 2-27            | TTCGTCGCCGGTCAGGGATATATATGTCTTTGCGAGAGCCCA  |
| U-SSTs-2H-30Column-58 | 2-28            | CCGGGACTCATGTAACCAACCCAGCGGAGATGGTGTTGTCCC  |
| U-SSTs-2H-30Column-59 | 2-29            | ACATGTTTCGGCACGGGCACGGGCAGGTAACATAACAATAACT |
| U-SSTs-2H-30Column-60 | 2-30            | GTGAGCCCAACTTGTTCAAGCGTGGTGACCCGTGATGGCTTA  |

**U-SSTs-2Hx70C**

| <b>Seq_ID</b>         | <b>Location</b> | <b>Sequence</b>                             |
|-----------------------|-----------------|---------------------------------------------|
| U-SSTs-2H-70Column-1  | 1-1             | TGGTGGGACGTCTGTCTTCGTGACATGCATAACCTCAGTCGC  |
| U-SSTs-2H-70Column-2  | 1-2             | CGAACGGTTTGTCTGTACGCGAGTCAGTATACTACTAATGT   |
| U-SSTs-2H-70Column-3  | 1-3             | TGATTCCCTCATCGTGGTGTCCGTTATGCGTAAGACCGGTACA |
| U-SSTs-2H-70Column-4  | 1-4             | AGCAGATTGCCTGGCATGGCGAGCTTACCTCGTGGTCCGGTA  |
| U-SSTs-2H-70Column-5  | 1-5             | TCTGCAGGTGAGCCGCCGCCGTGGGCATGGTTCGCAGAGAC   |
| U-SSTs-2H-70Column-6  | 1-6             | ATTTAGGCGTGCGCGAACTCGGCCAGCCCTTGATCGTCCGC   |
| U-SSTs-2H-70Column-7  | 1-7             | CTCGTTCTGCACATGTTGCCCTGCCTGGGCACACCTTTACAA  |
| U-SSTs-2H-70Column-8  | 1-8             | TAGTTCCTACTCCACACTGCTATGTCCCTGAGAAATGATACCC |
| U-SSTs-2H-70Column-9  | 1-9             | TATGCTCCTATAGAAAGACTTGTAGATGGTCTATTTACTGAA  |
| U-SSTs-2H-70Column-10 | 1-10            | GTGTAAGAGATACAGATATCAGAGATTAAGTGGCTGAGTGC   |
| U-SSTs-2H-70Column-11 | 1-11            | CGCGTCCCTGGGATGGAAATCTCATGCGGTCCAAAGCAGGCT  |
| U-SSTs-2H-70Column-12 | 1-12            | GGTTTGGATTCCGAAACAACCGAAATCGCGAGCGCCACGAGC  |
| U-SSTs-2H-70Column-13 | 1-13            | CTTTACGGCAGTAAACGGAAACTAATGGATCCTCATATCCGT  |
| U-SSTs-2H-70Column-14 | 1-14            | CATAATTAGTACTGCCGGCCTGGCCTACGTCCGCTATTACGA  |
| U-SSTs-2H-70Column-15 | 1-15            | TATATAGACACAAGGTGCCACTAGGACTTCCGCCTCCGGTAA  |
| U-SSTs-2H-70Column-16 | 1-16            | GTCCACTTATGACGAAAGTGTAAATCGGCCAATAGTGTGGTG  |
| U-SSTs-2H-70Column-17 | 1-17            | CCGTAAATGGGCATTAACCTCGCCTTTCCGTAAACTGACTGCC |
| U-SSTs-2H-70Column-18 | 1-18            | GACGGGCATGAGGCTGACTCCGCCGTACCCGTTTGACAACCT  |
| U-SSTs-2H-70Column-19 | 1-19            | GATTATTTGATACTGCTCGTGCCACATTCAACTCTTGAGGAA  |
| U-SSTs-2H-70Column-20 | 1-20            | ACCTCTCGGGCCGAGCCTCTTCACCTAAAGTGTCCCTTCTC   |
| U-SSTs-2H-70Column-21 | 1-21            | GCTATGGTTTACACCTTGCCTGCGTGAGAGAGCGGATTTGGT  |
| U-SSTs-2H-70Column-22 | 1-22            | GGCCCGCACCCCTTACGTGACACGCAACAGAGTCGAATAGAAT |
| U-SSTs-2H-70Column-23 | 1-23            | CTAACTGCTCACAGACATCGTAGCGGGACGGGCTCCTTGCTT  |
| U-SSTs-2H-70Column-24 | 1-24            | GCCTGTGAGAAGTACGTTACATCAACCTAACATCTTCAGGAT  |
| U-SSTs-2H-70Column-25 | 1-25            | AAGCAAATTCACGGGCCCTCAACTGATTTAGCGGCTATGGCCC |
| U-SSTs-2H-70Column-26 | 1-26            | AGTTGTGGGACTGGGCTCTCGCGGCGACGAACGTTAGAATC   |
| U-SSTs-2H-70Column-27 | 1-27            | CAAAGACATATGGGACAACACTGAGTCCCGGATATCCCTGAC  |
| U-SSTs-2H-70Column-28 | 1-28            | CATCTCCGCTGAGTTATTGTACCGAACATGTGGTTGGTTACA  |
| U-SSTs-2H-70Column-29 | 1-29            | TGTTACCTGCCTAAGCCATCATTGGGCTCACCGTGCCGCGTG  |
| U-SSTs-2H-70Column-30 | 1-30            | CGGGTCACCACCAACCAGCCACACGTGAAGGCTTGAACAAG   |
| U-SSTs-2H-70Column-31 | 1-31            | GGGAATATAACACACGATCGGAATACGTTATCGAGCATCCTC  |
| U-SSTs-2H-70Column-32 | 1-32            | AACAAGAGCTTCCCAGGTTTCGCGCAGAGTCCCTCCGAAACG  |
| U-SSTs-2H-70Column-33 | 1-33            | TACTCGCACTATAAATACATCTTTCAAATAGCCTCTCCAGCA  |
| U-SSTs-2H-70Column-34 | 1-34            | CATTCAGCTCTTTATCATAAAGAAATCAGCTAAATTGCTCCA  |
| U-SSTs-2H-70Column-35 | 1-35            | CTAGACACCTCTAGCGTTCGTGATACTCTCGTGGACTTTAGC  |
| U-SSTs-2H-70Column-36 | 1-36            | GTGGTGCGGCCCTTGGGCCGTGGAGAAATTTAGCTCTGGTACC |
| U-SSTs-2H-70Column-37 | 1-37            | AAGCAATTAGTTACGCTGAAGAGAGAGAATAGATGTTCGAAGT |
| U-SSTs-2H-70Column-38 | 1-38            | CTATAACTTCCGGTCCATAAGGTATGGCTCGAGCTCAGGTCC  |
| U-SSTs-2H-70Column-39 | 1-39            | CAGGGCCGAAGTACCCGCGGCTCCAGCCGAGGCAAATAGAA   |
| U-SSTs-2H-70Column-40 | 1-40            | TCGTATGAACAAAGACCCACTACAATCGCCGACCTTAACGAT  |
| U-SSTs-2H-70Column-41 | 1-41            | TGCTCATGACATAGGGTGTACGCACCCAGCCAACTCATCGAT  |
| U-SSTs-2H-70Column-42 | 1-42            | TACACGGTACCGATCTGAGGCGAAGGCAGAGATAACGCAGAC  |
| U-SSTs-2H-70Column-43 | 1-43            | TACTACCTTTGACCGGAAAGAGGCAGAAGTACGCATCGCAC   |
| U-SSTs-2H-70Column-44 | 1-44            | CGCATTCAGAATAGTGGGAAGCAACTCTGGATATGTAGGTAT  |
| U-SSTs-2H-70Column-45 | 1-45            | ACGGGAGGCTTTGACATGGATACTAGAGTGGCGCTACGGCCG  |
| U-SSTs-2H-70Column-46 | 1-46            | GGGCTGATCGTATCTTTACTCGCGATAAGACGGTTATGTTGT  |
| U-SSTs-2H-70Column-47 | 1-47            | TATTGTCAACGTGTCCCAAGCTGACGCCACCCGCGTCAACA   |

| <b>Seq_ID</b>         | <b>Location</b> | <b>Sequence</b>                                   |
|-----------------------|-----------------|---------------------------------------------------|
| U-SSTs-2H-70Column-48 | 1-48            | CAGTAACAAGTAATAGTTAGAAAGCGTTCCTTTATGCACCCAAA      |
| U-SSTs-2H-70Column-49 | 1-49            | TAATTACAATATTTAATCCACCCTACTCAAGTCGTTGGGCAG        |
| U-SSTs-2H-70Column-50 | 1-50            | CATTTGCCGAGGGCTACCATATGACACAGGTTCTCCTCCGGG        |
| U-SSTs-2H-70Column-51 | 1-51            | CGACTGCTTGCAGGGCCTTTGAGCGGAATAGCCACTCTGTGA        |
| U-SSTs-2H-70Column-52 | 1-52            | ATCGGATCCAAAGTGTGGTTCGACAGCAGGAGGCTAAGACA         |
| U-SSTs-2H-70Column-53 | 1-53            | TGTACCAGGTGTAGATCGCCTTACGAGTCGTAGCTAAGGCAT        |
| U-SSTs-2H-70Column-54 | 1-54            | GCGAGTGCCGTTGATACGCTGGGTCGCCGTGACCTTTCGCGT        |
| U-SSTs-2H-70Column-55 | 1-55            | TCCTAAAGACGCAGAACAGCGTCCCATCCCTGCTGTTTCGTCC       |
| U-SSTs-2H-70Column-56 | 1-56            | GGCCCTGTGTATAGGGCCAGACTAGCTAACGGGTTGCCTGT         |
| U-SSTs-2H-70Column-57 | 1-57            | AGCATCTTGC GCGAGCACACCGACCGACGATCGAGTTGGTTG       |
| U-SSTs-2H-70Column-58 | 1-58            | AGCCTAGTTACCCTCTCAACTCAAGATTCCCTTAGGCCTGAG        |
| U-SSTs-2H-70Column-59 | 1-59            | CTATGGCTTGATTTAATAAGCGAGGGTCAATAGGGTCCAATC        |
| U-SSTs-2H-70Column-60 | 1-60            | CAAAGCATTGATTGACATCTGGCGGTTCTGTAGAGAACACGC        |
| U-SSTs-2H-70Column-61 | 1-61            | ACCATAGACGGATACCAACCTTAGTCTTCCATAACGCCATCC        |
| U-SSTs-2H-70Column-62 | 1-62            | GCTAGTACCAGCAAGGTACTGAACGCCGGCCTAGGGATAAA         |
| U-SSTs-2H-70Column-63 | 1-63            | TCTCATCTGTGCCGGGCTCTACGGAATTAGGAAAGACCTATT        |
| U-SSTs-2H-70Column-64 | 1-64            | GTCAATACCAGACCCAAGTCTGGATCTAAGAATTCCAGGGAA        |
| U-SSTs-2H-70Column-65 | 1-65            | CGGAAGCTTAACCCTAGAGATATGCTCTCGGCGTAACTCGTC        |
| U-SSTs-2H-70Column-66 | 1-66            | GCGTAGGTGGGAGCTCCTAGTAACAGTAACGATTGGTAAAGA        |
| U-SSTs-2H-70Column-67 | 1-67            | AGCGGTCCGTAGCCCAGCTACTTCCCATACTGGTCTCAGATA        |
| U-SSTs-2H-70Column-68 | 1-68            | GCTGGAGCCATTCCCTCGTCAACCTCACAGCAGTGCCGCTTCC       |
| U-SSTs-2H-70Column-69 | 1-69            | GGTAACGTGGGAACGGTGTAGTGTGCGGGTGATAGGGCTGTG        |
| U-SSTs-2H-70Column-70 | 1-70            | CAAACCTGAATGttttttttttttttttttttttttttTCCCTCCCTGT |
| U-SSTs-2H-70Column-71 | 2-1             | tttttttttttGCGACTGAGGTACGTCCCACCAttttttttttt      |
| U-SSTs-2H-70Column-72 | 2-2             | TATGCATGTCACATTAGTAGTCAAACCGTTCGACGAAGACAG        |
| U-SSTs-2H-70Column-73 | 2-3             | ATACTGACTCTGTACCGGTCTATGAGGAATCAGCGTGACAGA        |
| U-SSTs-2H-70Column-74 | 2-4             | TACGCATAACTACCCGACCACGGCAATCTGCTGGACACCACG        |
| U-SSTs-2H-70Column-75 | 2-5             | GAGGTAAGCTGTCTCTGCGAATCACCTGCAGACGCCATGCCA        |
| U-SSTs-2H-70Column-76 | 2-6             | CCATGCCACGCGGACGATCACACGCCATAATCGGCGGGCGGC        |
| U-SSTs-2H-70Column-77 | 2-7             | AGGGCTGGGCTTGTAAGGTGTGCAGAACGAGCGAGTTCGCG         |
| U-SSTs-2H-70Column-78 | 2-8             | TGCCCAGGCAGGGTATCATTTAGTAGGAACTAGGGCAACATG        |
| U-SSTs-2H-70Column-79 | 2-9             | CTCAGGACATTTTCAAGTAAATAATAGGAGCATAAGCAGTGTGG      |
| U-SSTs-2H-70Column-80 | 2-10            | GACCATCTACGCACTCAGCCAATCTCTTACACAAGTCTTTCT        |
| U-SSTs-2H-70Column-81 | 2-11            | CTTTAATCTCAGCCTGCTTTGCCAGGGACGCGTGATATCTGT        |
| U-SSTs-2H-70Column-82 | 2-12            | GACCGCATGAGCTCGTGGCGGAATCCAAACCGATTTCCATC         |
| U-SSTs-2H-70Column-83 | 2-13            | TCGCGATTTTACGGATATGAGCTGCCGTAAAGGGTTGTTTCG        |
| U-SSTs-2H-70Column-84 | 2-14            | GATCCATTAGTCGTAATAGCGTACTAATTATGTTTCCGTTTA        |
| U-SSTs-2H-70Column-85 | 2-15            | GACGTAGGCCTTACCGGAGGCGTGTCTATATAAGGCCGGCAG        |
| U-SSTs-2H-70Column-86 | 2-16            | GGAAGTCTTACACCAGCACTACATAAGTGGACGTGGCACCTT        |
| U-SSTs-2H-70Column-87 | 2-17            | TTGGCCGATTGGCAGTCAGTTCCCATTTACGGACACTTTCGT        |
| U-SSTs-2H-70Column-88 | 2-18            | TACGGAAAGGAGTTGTCAAACCTCATGCCCGTCCGAGTTAATG       |
| U-SSTs-2H-70Column-89 | 2-19            | GGGTACGGGCTTCCCTCAAGAGATCAAATAATCGGAGTCAGCC       |
| U-SSTs-2H-70Column-90 | 2-20            | TTGAATGTGGGAGAAGGGACAGCCGAGAGGTACACGAGCAGT        |
| U-SSTs-2H-70Column-91 | 2-21            | CTTTAGGTGAACCAAATCCGCTAAACCATAGCAGAGGCTGCG        |
| U-SSTs-2H-70Column-92 | 2-22            | TCTCTCACGCATTCTATTCGAGGGTGCGGGCCAGGCAAGGTC        |
| U-SSTs-2H-70Column-93 | 2-23            | CTCTGTTGCGAAGCAAGGAGCTGAGCAGTTAGTGTACGTAA         |
| U-SSTs-2H-70Column-94 | 2-24            | CCGTCCCGCTATCCTGAAGATTTCTGACAGGCACGATGTCTG        |
| U-SSTs-2H-70Column-95 | 2-25            | GTTAGGTTGAGGGCCATAGCCTGAATTTGCTTTGTAACGTAC        |

| <b>Seq_ID</b>          | <b>Location</b> | <b>Sequence</b>                               |
|------------------------|-----------------|-----------------------------------------------|
| U-SSTs-2H-70Column-96  | 2-26            | GCTAAATCAGGAGTTCTAACGGTCCCACAACTTTGAGGCCCG    |
| U-SSTs-2H-70Column-97  | 2-27            | TTCGTCGCCGGTCAGGGATATATATATGTC'TTTGCGAGAGCCCA |
| U-SSTs-2H-70Column-98  | 2-28            | CCGGGACTCATGTAACCAACCCAGCGGAGATGGTGTGTGCC     |
| U-SSTs-2H-70Column-99  | 2-29            | ACATG'TTCGGCACGCGGCACGGGCAGGTAACATAACAATAACT  |
| U-SSTs-2H-70Column-100 | 2-30            | GTGAGCCCAACTTGT'TCAAGCGTGGTGACCCGTGATGGCTTA   |
| U-SSTs-2H-70Column-101 | 2-31            | CTTCACGTGTGAGGATGCTCGGTTATAT'TCCCGGCGTGGTTG   |
| U-SSTs-2H-70Column-102 | 2-32            | ATAACGTAT'TCGTTTCCGGAGAAGCTCTTGT'TCCGATCGTGT  |
| U-SSTs-2H-70Column-103 | 2-33            | GGACTCTGCGTGCTGGAGAGGTAGTGCGAGTACGAACCTGGG    |
| U-SSTs-2H-70Column-104 | 2-34            | CTATTTGAAATGGAGCAATTTAGAGCTGAATGGATGTATTTA    |
| U-SSTs-2H-70Column-105 | 2-35            | AGCTGATTTTCGCTAAAGTCCAGAGGTGTCTAGTTTATGATAA   |
| U-SSTs-2H-70Column-106 | 2-36            | CGAGAGTATCGGTACCAGAGCGGCCGCACCACACGAACGCTA    |
| U-SSTs-2H-70Column-107 | 2-37            | TAAATTTCTCACTTCGACATCACTAAT'TGCTTACGGCCCAA    |
| U-SSTs-2H-70Column-108 | 2-38            | TAT'TCTCTCTGGACCTGAGCTGGAAGTTATAGCTTCAGCGTA   |
| U-SSTs-2H-70Column-109 | 2-39            | CGAGCCATACTTCTATTTGCCC'TTCGGCCCTGCTTATGGACC   |
| U-SSTs-2H-70Column-110 | 2-40            | TCCGCTGGGAATCGTTAAGGTTGTT'CATACGAGCCGCGGGTA   |
| U-SSTs-2H-70Column-111 | 2-41            | CGGCGATTGTATCGATGAGTTTGT'CATGAGCAAGTGGTCTT    |
| U-SSTs-2H-70Column-112 | 2-42            | GGCTGGGTGCGTCTGCGTTATGGTACCGTGTAGTACACCCTA    |
| U-SSTs-2H-70Column-113 | 2-43            | CTCTGCCTTCGTGCGATGCGCAAAGGTAGTAGCCTCAGATC     |
| U-SSTs-2H-70Column-114 | 2-44            | TAGTTCTGCCATACTACATATTCTGAATGCGTCTTTCCGGT     |
| U-SSTs-2H-70Column-115 | 2-45            | TCCAGAGTTGCGGCCGTAGCGAAGCCTCCCGTCTTCCCCTA     |
| U-SSTs-2H-70Column-116 | 2-46            | CCACTCTAGTACAACATAACCACGATCAGCCCATCCATGTCA    |
| U-SSTs-2H-70Column-117 | 2-47            | GTCTTATCGCTGTTGACGCGCGTTGACAATAGAGTAAAGAT     |
| U-SSTs-2H-70Column-118 | 2-48            | GTGGGCGTCATTTGGGTGCATACTTGT'TACTGGCTTGGGACA   |
| U-SSTs-2H-70Column-119 | 2-49            | AAAGAACGCTCTGCCCAACGATATTGTAATTATCTAACTATT    |
| U-SSTs-2H-70Column-120 | 2-50            | CTTGAGTAGGCCCGGAGGAGACTCGGCAAATGGTGGATTAAA    |
| U-SSTs-2H-70Column-121 | 2-51            | ACCTGTGT'CATCACAGAGTGGGCAAGCAGT'CGTATGGTAGCC  |
| U-SSTs-2H-70Column-122 | 2-52            | CTAT'TCCGCTTGTCTTAGCCTTTGGATCCGATCAAAGGCCTC   |
| U-SSTs-2H-70Column-123 | 2-53            | CGT'CGTCTGCATGCCTTAGCTCACCTGGTACAGACCAACT     |
| U-SSTs-2H-70Column-124 | 2-54            | ACGACTCGTAACGCGAAAGGTACGGCACTCGCAGGCGATCTA    |
| U-SSTs-2H-70Column-125 | 2-55            | CACGGCGACCGGACGAACAGCCGCTCTTTAGGACAGCGTATCA   |
| U-SSTs-2H-70Column-126 | 2-56            | AGGGATGGGAACAGGCAACCCTACACAGGGCCCGCTGTTCTG    |
| U-SSTs-2H-70Column-127 | 2-57            | GTTAGCTAGTCAACCAACTCGCGCAAGATGCTCTGGGCCCTA    |
| U-SSTs-2H-70Column-128 | 2-58            | ATCGTCGGTCC'CTCAGGCCTAAGTAACTAGGCTGGTGTGCTCG  |
| U-SSTs-2H-70Column-129 | 2-59            | AGGAATCTTGGATTGGACCCTTCAAGCCATAGAGTTGAGAGG    |
| U-SSTs-2H-70Column-130 | 2-60            | ATTGACCCTCGCGTGT'TCTTCAATGCTTTGGCTTATTTAA     |
| U-SSTs-2H-70Column-131 | 2-61            | ACAGAACC'CGGATGGCGTTACCGTCTATGGTCAGATGTCAA    |
| U-SSTs-2H-70Column-132 | 2-62            | TGGAAGACTATTTATCCCTAGCTGGTACTAGCAGGTTGGTAT    |
| U-SSTs-2H-70Column-133 | 2-63            | TGCCGGCGTTAATAGGTCTTTACAGATGAGACAGTACCTTG     |
| U-SSTs-2H-70Column-134 | 2-64            | CCTAAT'TCCGTTCCCTGGAATCTGGTATTGACTAGAGCCCGG   |
| U-SSTs-2H-70Column-135 | 2-65            | TCTTAGATCCGACGAGTTACGTTAAGCTTCCGAGACTTGGGT    |
| U-SSTs-2H-70Column-136 | 2-66            | CCGAGAGCAT'TCTTTACCAATCCCACCTACGCATCTCTAGGG   |
| U-SSTs-2H-70Column-137 | 2-67            | CGTTACTGTTTATCTGAGACCTACGGACCGCTACTAGGAGCT    |
| U-SSTs-2H-70Column-138 | 2-68            | AGTATGGGAAGGAAGCGGCACATGGCTCCAGCGTAGCTGGGC    |
| U-SSTs-2H-70Column-139 | 2-69            | TGCTGTGAGGCACAGCCCTATCCCACGTTACCTTGACGAGGA    |
| U-SSTs-2H-70Column-140 | 2-70            | CACCCGCACAACAGGGAGGGACATTCAGTTTGCTACACCGTT    |



**U-SSTs-2Hx100C**

| <b>Seq_ID</b>          | <b>Location</b> | <b>Sequence</b>                              |
|------------------------|-----------------|----------------------------------------------|
| U-SSTs-2H-100Column-1  | 1-1             | TGGTGGGACGTCTGTCTTCGTGACATGCATAACCTCAGTCGC   |
| U-SSTs-2H-100Column-2  | 1-2             | CGAACGGTTTGTCTGTACGCGAGTCAGTATACTACTAATGT    |
| U-SSTs-2H-100Column-3  | 1-3             | TGATTCCCTCATCGTGGTGTCCGTTATGCGTAAGACCGGTACA  |
| U-SSTs-2H-100Column-4  | 1-4             | AGCAGATTGCCTGGCATGGCGAGCTTACCTCGTGGTCGGGTA   |
| U-SSTs-2H-100Column-5  | 1-5             | TCTGCAGGTGAGCCGCCCGGTGGGCATGGTTCGCAGAGAC     |
| U-SSTs-2H-100Column-6  | 1-6             | ATTTAGGCGTGCGCGAACTCGGCCAGCCCTTGATCGTCCGC    |
| U-SSTs-2H-100Column-7  | 1-7             | CTCGTTCTGCACATGTTGCCCTGCCTGGGCACACCTTTACAA   |
| U-SSTs-2H-100Column-8  | 1-8             | TAGTTCCTACTCCACACTGCTATGTCTGAGAAATGATACCC    |
| U-SSTs-2H-100Column-9  | 1-9             | TATGCTCCTATAGAAAGACTTGTAGATGGTCTATTTACTGAA   |
| U-SSTs-2H-100Column-10 | 1-10            | GTGTAAGAGATACAGATATCAGAGATTAAGTGGCTGAGTGC    |
| U-SSTs-2H-100Column-11 | 1-11            | CGCGTCCCTGGGATGGAAATCTCATGCGGTCCAAAGCAGGCT   |
| U-SSTs-2H-100Column-12 | 1-12            | GGTTTGGATTCCGAAACAACCGAAATCGCGAGCGCCACGAGC   |
| U-SSTs-2H-100Column-13 | 1-13            | CTTTACGGCAGTAAACGGAACTAATGGATCCTCATATCCGT    |
| U-SSTs-2H-100Column-14 | 1-14            | CATAATTAGTACTGCCGGCTGGCCTACGTCCGCTATTACGA    |
| U-SSTs-2H-100Column-15 | 1-15            | TATATAGACACAAGGTGCCACTAGGACTTCCGCCTCCGGTAA   |
| U-SSTs-2H-100Column-16 | 1-16            | GTCCACTTATGACGAAAGTGTAATCGGCCAATAGTGCTGGTG   |
| U-SSTs-2H-100Column-17 | 1-17            | CCGTAAATGGGCATTAACCTCGCCTTTCCGTAAACTGACTGCC  |
| U-SSTs-2H-100Column-18 | 1-18            | GACGGGCATGAGGCTGACTCCGCCCGTACCCGTTTGACAACCT  |
| U-SSTs-2H-100Column-19 | 1-19            | GATTATTTGATACTGCTCGTGCCACATTCAACTCTTGAGGAA   |
| U-SSTs-2H-100Column-20 | 1-20            | ACCTCTCGGGCCGCAGCCTCTTCACCTAAAGTGTCCTTCTC    |
| U-SSTs-2H-100Column-21 | 1-21            | GCTATGGTTTAGACCTTGCCGTGAGAGAGCGGATTTGGT      |
| U-SSTs-2H-100Column-22 | 1-22            | GGCCCGCACCCCTTACGTGACACGCAACAGAGTCGAATAGAAT  |
| U-SSTs-2H-100Column-23 | 1-23            | CTAACTGCTCACAGACATCGTAGCGGGACGGGCTCCTTGCTT   |
| U-SSTs-2H-100Column-24 | 1-24            | GCCTGTGAGAAGTACGTTACATCAACCTAACATCTTCAGGAT   |
| U-SSTs-2H-100Column-25 | 1-25            | AAGCAAATTCACGGGCCTCAACTGATTTAGCGGCTATGGCCC   |
| U-SSTs-2H-100Column-26 | 1-26            | AGTTGTGGGACTGGGCTCTCGCGGCGACGAACGTTAGAATC    |
| U-SSTs-2H-100Column-27 | 1-27            | CAAAGACATATGGGACAACACTGAGTCCCAGGATATCCCTGAC  |
| U-SSTs-2H-100Column-28 | 1-28            | CATCTCCGCTGAGTTATTGTACCGAACATGTGGTTGGTTACA   |
| U-SSTs-2H-100Column-29 | 1-29            | TGTTACCTGCCTAAGCCATCATTTGGGCTCACCGTGCCGCGTG  |
| U-SSTs-2H-100Column-30 | 1-30            | CGGGTCAACCACCAACCACGCCACACGTGAAGGCTTGAACAAG  |
| U-SSTs-2H-100Column-31 | 1-31            | GGGAATATAACACACGATCGGAATACGTTATCGAGCATCCTC   |
| U-SSTs-2H-100Column-32 | 1-32            | AACAAGAGCTTCCCAGGTTTCGCGCAGAGTCCCTCCGGAAACG  |
| U-SSTs-2H-100Column-33 | 1-33            | TACTCGCACTATAAATACATCTTTCAAATAGCCTCTCCAGCA   |
| U-SSTs-2H-100Column-34 | 1-34            | CATTACGCTCTTTATCATAAAGAAATCAGCTAAATTGCTCCA   |
| U-SSTs-2H-100Column-35 | 1-35            | CTAGACACCTCTAGCGTTTCGTGATACTCTCGTGGACTTTAGC  |
| U-SSTs-2H-100Column-36 | 1-36            | GTGGTTCGGCCTTGGGCCGTGGAGAAATTTAGTCTGTTGTTACC |
| U-SSTs-2H-100Column-37 | 1-37            | AAGCAATTAGTTACGCTGAAGAGAGAGAATAGATGTCGAAGT   |
| U-SSTs-2H-100Column-38 | 1-38            | CTATAACTTCCGGTCCATAAGGTATGGCTCGAGCTCAGGTCC   |
| U-SSTs-2H-100Column-39 | 1-39            | CAGGGCCGAAGTACCCGCGGCTCCCAGCCGAGGCAAATAGAA   |
| U-SSTs-2H-100Column-40 | 1-40            | TCGTATGAACAAAGACCCACTACAATCGCCGACCTTAACGAT   |
| U-SSTs-2H-100Column-41 | 1-41            | TGCTCATGACATAGGGTGTACGCACCCAGCCAACCTCATCGAT  |
| U-SSTs-2H-100Column-42 | 1-42            | TACACGGTACCGATCTGAGGCGAAGGCAGAGATAACGCAGAC   |
| U-SSTs-2H-100Column-43 | 1-43            | TACTACCTTTGACCGAAAGAGGCAGAAGTACGCGATCGCAC    |
| U-SSTs-2H-100Column-44 | 1-44            | CGCATTGAGAAATAGTGGGAAGCAACTCTGGATATGTAGGTAT  |
| U-SSTs-2H-100Column-45 | 1-45            | ACGGGAGGCTTTGACATGGATACTAGAGTGGCGCTACGGCCG   |
| U-SSTs-2H-100Column-46 | 1-46            | GGGCTGATCGTATCTTTACTCGCGATAAGACGGTTATGTTGT   |
| U-SSTs-2H-100Column-47 | 1-47            | TATTGTCAACGTGTCCAAGCTGACGCCACCCGCGTCAACA     |

| <b>Seq_ID</b>          | <b>Location</b> | <b>Sequence</b>                              |
|------------------------|-----------------|----------------------------------------------|
| U-SSTs-2H-100Column-48 | 1-48            | CAGTAACAAGTAATAGTTAGAAGCGTTCTTTATGCACCCAAA   |
| U-SSTs-2H-100Column-49 | 1-49            | TAATTACAATATTTAATCCACCCTACTCAAGTCGTTGGGCAG   |
| U-SSTs-2H-100Column-50 | 1-50            | CATTTGCCGAGGGCTACCATATGACACAGGTTCTCCTCCGGG   |
| U-SSTs-2H-100Column-51 | 1-51            | CGACTGCTTGCGAGGCCTTTGAGCGGAATAGCCACTCTGTGA   |
| U-SSTs-2H-100Column-52 | 1-52            | ATCGGATCCAAAGTGTTGGTTCGCAGACGACGAGGCTAAGACA  |
| U-SSTs-2H-100Column-53 | 1-53            | TGTACCAGGTGTAGATCGCCTTACGAGTCGTAGCTAAGGCAT   |
| U-SSTs-2H-100Column-54 | 1-54            | GCGAGTGCCGTTGATACGCTGGGTGCGCCGTGACCTTTCGCGT  |
| U-SSTs-2H-100Column-55 | 1-55            | TCCTAAAGACGCAGAACAGCGTCCCATCCCTGCTGTTTCGTCC  |
| U-SSTs-2H-100Column-56 | 1-56            | GGCCCTGTGTATAGGGCCAGACTAGCTAACGGGTTGCCTGT    |
| U-SSTs-2H-100Column-57 | 1-57            | AGCATCTTGC GCGAGCACACCGACCGACGATCGAGTTGGTTG  |
| U-SSTs-2H-100Column-58 | 1-58            | AGCCTAGTTACCCTCTCAACTCAAGATTCCTTTAGGCCTGAG   |
| U-SSTs-2H-100Column-59 | 1-59            | CTATGGCTTGATTTAATAAGCGAGGGTCAATAGGGTCCAATC   |
| U-SSTs-2H-100Column-60 | 1-60            | CAAAGCATTGATTGACATCTGGCGGTTCTGTAGAGAACACGC   |
| U-SSTs-2H-100Column-61 | 1-61            | ACCATAGACGGATACCAACCTTAGTCTTCCATAACGCCATCC   |
| U-SSTs-2H-100Column-62 | 1-62            | GCTAGTACCAGCAAGGTACTGAACGCCGGCACTAGGGATAAA   |
| U-SSTs-2H-100Column-63 | 1-63            | TCTCATCTGTGCCGGGCTCTACGGAATTAGGAAAGACCTATT   |
| U-SSTs-2H-100Column-64 | 1-64            | GTCAATACCAGACCCAAGTCTGGATCTAAGAATTCAGGGAA    |
| U-SSTs-2H-100Column-65 | 1-65            | CGGAAGCTTAACCCTAGAGATATGCTCTCGGCGTAACTCGTC   |
| U-SSTs-2H-100Column-66 | 1-66            | GCGTAGGTGGGAGCTCCTAGTAACAGTAACGATTGGTAAAGA   |
| U-SSTs-2H-100Column-67 | 1-67            | AGCGGTCCGTAGCCAGCTACTTCCATACTGGTCTCAGATA     |
| U-SSTs-2H-100Column-68 | 1-68            | GCTGGAGCCATTCCTCGTCAACCTCACAGCAGTGCCGCTTCC   |
| U-SSTs-2H-100Column-69 | 1-69            | GGTAACGTGGGAACGGTGTAGTGTGCGGGTGATAGGGCTGTG   |
| U-SSTs-2H-100Column-70 | 1-70            | CAAAGTGAATGATGTGGGCGATCGACTTCATTCCCTCCCTGT   |
| U-SSTs-2H-100Column-71 | 1-71            | TCAATAGTACTCCATATTTTCAGACGAGAGAAGCAGAGCCAAA  |
| U-SSTs-2H-100Column-72 | 1-72            | TATGCAATACGCTCGGGTGAGTGTATTTGAGCTTCATCCACG   |
| U-SSTs-2H-100Column-73 | 1-73            | ACTGTGAGTTAGGCTTCGAGCTTCTTTAAGGGCTTAGCCAGG   |
| U-SSTs-2H-100Column-74 | 1-74            | CGCCAAGAAAGAAAGGGTGTGGCGAAGAACC CGCTAAGTAGA  |
| U-SSTs-2H-100Column-75 | 1-75            | TAGCGACCACCAGAAGACTGATGTACCCTTTAGCGCACTCTT   |
| U-SSTs-2H-100Column-76 | 1-76            | CTTTGTAGAGTCTTACGGCGAGTTGCTGCACCTATGATGCAA   |
| U-SSTs-2H-100Column-77 | 1-77            | AGGTCTGGAACCGTACGATATACAGCCCAAGTGGCACTTTAC   |
| U-SSTs-2H-100Column-78 | 1-78            | TGATGTCTTACGGCTGGATGGAGCCTCTAACTTCGCAGCGTT   |
| U-SSTs-2H-100Column-79 | 1-79            | CTAGATTTTATTGAAGTCTATCAGTCTAGAATGAGTACATTTA  |
| U-SSTs-2H-100Column-80 | 1-80            | AGCCGGCATGGATCTGAACTTCAGCGAGACACTGTTATCTT    |
| U-SSTs-2H-100Column-81 | 1-81            | AGTATATCTATCTCACC GAAGGTATGCCCGCCAGTATAGGC   |
| U-SSTs-2H-100Column-82 | 1-82            | TCGTATGTCCGGCCACGGCGGAAACAGGTTTCCCTGATGATG   |
| U-SSTs-2H-100Column-83 | 1-83            | CACACGGGTTTATAGCATTTCGATGATGGTCCACCCATTCCGC  |
| U-SSTs-2H-100Column-84 | 1-84            | ATCGATGGGATAGTTTAATTAGCCTGCGGAGGGCATGCGGAC   |
| U-SSTs-2H-100Column-85 | 1-85            | ATCGTCCACCTCGAGGCTTGT CATCTAAAGATGACCCAGTCT  |
| U-SSTs-2H-100Column-86 | 1-86            | TATTCGAACGTCTCTGTGCGCAAGTTTATTCTTGCCGTATTA   |
| U-SSTs-2H-100Column-87 | 1-87            | GAATGTACGACCAAAGTACGGTACAACGTTACGTAGCTTCTG   |
| U-SSTs-2H-100Column-88 | 1-88            | GATGATATGGCGTAATAAACACTTAAACAATGAGAGACGGCA   |
| U-SSTs-2H-100Column-89 | 1-89            | ACGAGGAGATATCTAAGTCGCTGAGTGGCATTTCTGTGCTA    |
| U-SSTs-2H-100Column-90 | 1-90            | GCCGAAAGGCCGTAATTTCCCGAGACCATTAGAGACGCTAATC  |
| U-SSTs-2H-100Column-91 | 1-91            | CGGACCGTATTGTTTGACCCGATCAGTTCTTTGGAAGCCAAG   |
| U-SSTs-2H-100Column-92 | 1-92            | CTAAGGTCCCTCTGGTGTCTGGGCGACTGGACTCTCGCTCCG   |
| U-SSTs-2H-100Column-93 | 1-93            | CGGCGGGACTTACACTTAGGTACAAGCGTTT TAGGAAGCAGGT |
| U-SSTs-2H-100Column-94 | 1-94            | AACCCGCAGATCACTACCGCGTCGCTAGTCGGCGGTTAGCTC   |
| U-SSTs-2H-100Column-95 | 1-95            | CGTTTAAATAAGCTCAGTGGTCGAGACGATGTTGATGAACTT   |

| <b>Seq_ID</b>           | <b>Location</b> | <b>Sequence</b>                                    |
|-------------------------|-----------------|----------------------------------------------------|
| U-SSTs-2H-100Column-96  | 1-96            | AGGACCAGGATAACTTTCTTCTCCTACGCTCAATTGCCTCAA         |
| U-SSTs-2H-100Column-97  | 1-97            | AGAGCTGGGTAGGTACGCAGCATCCAGATAAGGGTAGAACCC         |
| U-SSTs-2H-100Column-98  | 1-98            | ATTGCGCCACATACGTTTCCAGGTCGGGAAGTTGTCGTCTAA         |
| U-SSTs-2H-100Column-99  | 1-99            | GCGACCGCGGCATTGACTGTTGCCGGTCGGGCTATCCCCACA         |
| U-SSTs-2H-100Column-100 | 1-100           | GAATTTCCGCTttttttttttttttttttttttttttttTTGTAAATTGT |
| U-SSTs-2H-100Column-101 | 2-1             | tttttttttttGCGACTGAGGTACGTCCCACCAttttttttttt       |
| U-SSTs-2H-100Column-102 | 2-2             | TATGCATGTCACATTAGTAGTCAAACCGTTTCGACGAAGACAG        |
| U-SSTs-2H-100Column-103 | 2-3             | ATACTGACTCTGTACCGGTCTATGAGGAATCAGCGTGACAGA         |
| U-SSTs-2H-100Column-104 | 2-4             | TACGCATAACTACCCGACCACGGCAATCTGCTGGACACCACG         |
| U-SSTs-2H-100Column-105 | 2-5             | GAGGTAAGCTGTCTCTGCGAATCACCTGCAGACGCCATGCCA         |
| U-SSTs-2H-100Column-106 | 2-6             | CCATGCCACGCGGACGATCACACGCCTAAATCGGCGGCGGC          |
| U-SSTs-2H-100Column-107 | 2-7             | AGGGCTGGGCTTGTAAAGGTGTGCAGAACGAGCGAGTTCGCG         |
| U-SSTs-2H-100Column-108 | 2-8             | TGCCCAGGCAGGGTATCATTTAGTAGGAAGTACGGCAACATG         |
| U-SSTs-2H-100Column-109 | 2-9             | CTCAGGACATTTTCAGTAAATAATAGGAGCATAAGCAGTGTGG        |
| U-SSTs-2H-100Column-110 | 2-10            | GACCATCTACGCACTCAGCCAATCTCTTACACAAGTCTTTCT         |
| U-SSTs-2H-100Column-111 | 2-11            | CTTTAATCTCAGCCTGCTTTGCCAGGGACGCGTGATATCTGT         |
| U-SSTs-2H-100Column-112 | 2-12            | GACCGCATGAGCTCGTGGCGGAATCCAAACCGATTTCCATC          |
| U-SSTs-2H-100Column-113 | 2-13            | TCGCGATTTACGGATATGAGCTGCCGTAAAGGGTTGTTTCG          |
| U-SSTs-2H-100Column-114 | 2-14            | GATCCATTAGTCGTAATAGCGTACTAATTATGTTTCCGTTTA         |
| U-SSTs-2H-100Column-115 | 2-15            | GACGTAGGCCTTACCGGAGGCGTGTCTATATAAGGCCGGCAG         |
| U-SSTs-2H-100Column-116 | 2-16            | GGAAGTCCTACACCAGCACTACATAAGTGGACGTGGCACCTT         |
| U-SSTs-2H-100Column-117 | 2-17            | TTGGCCGATTTGGCAGTCAGTCCCATTTACGGACACTTTTCGT        |
| U-SSTs-2H-100Column-118 | 2-18            | TACGGAAAGGAGTTGTCAAACCTCATGCCCGTCCGAGTTAATG        |
| U-SSTs-2H-100Column-119 | 2-19            | GGGTACGGGCTTCCTCAAGAGATCAAATAATCGGAGTCAGCC         |
| U-SSTs-2H-100Column-120 | 2-20            | TTGAATGTGGGAGAAGGGACAGCCCAGAGGTCACGAGCAGT          |
| U-SSTs-2H-100Column-121 | 2-21            | CTTTAGGTGAACCAAATCCGCTAAACCATAGCAGAGGCTGCG         |
| U-SSTs-2H-100Column-122 | 2-22            | TCTCTCACGCATTTCTATTCGAGGGTGCGGGCCAGGCAAGGTC        |
| U-SSTs-2H-100Column-123 | 2-23            | CTCTGTTGCGAAGCAAGGAGCTGAGCAGTTAGTGTACAGTAA         |
| U-SSTs-2H-100Column-124 | 2-24            | CCGTCCCCTATCCTGAAGATTTCTGACAGGCACGATGTCTG          |
| U-SSTs-2H-100Column-125 | 2-25            | GTTAGGTTGAGGGCCATAGCCTGAATTTGCTTTGTAACGTAC         |
| U-SSTs-2H-100Column-126 | 2-26            | GCTAAATCAGGAGTTCTAACGGTCCCACAACCTTTGAGGCCCG        |
| U-SSTs-2H-100Column-127 | 2-27            | TTCTGTCGCCGTCAGGGATATATATGTCTTTGCGAGAGCCCA         |
| U-SSTs-2H-100Column-128 | 2-28            | CCGGGACTCATGTAACCAACCAGCGGAGATGGTGTGTTGCC          |
| U-SSTs-2H-100Column-129 | 2-29            | ACATGTTCCGGCACGCGGCACGGGCAGGTAACATACAATAACT        |
| U-SSTs-2H-100Column-130 | 2-30            | GTGAGCCCAACTTGTTC AAGCGTGGTGACCCGTGATGGCTTA        |
| U-SSTs-2H-100Column-131 | 2-31            | CTTCACGTGTGAGGATGCTCGGTTATATTTCCCGCGTGTTG          |
| U-SSTs-2H-100Column-132 | 2-32            | ATAACGTATTCGTTTCCGGAGAAGCTCTTGTTCGGATCGTGT         |
| U-SSTs-2H-100Column-133 | 2-33            | GGACTCTGCGTGCTGGAGAGGTAGTGCGAGTACGAACCTGGG         |
| U-SSTs-2H-100Column-134 | 2-34            | CTATTTGAAATGGAGCAATTTAGAGCTGAATGGATGTATTTA         |
| U-SSTs-2H-100Column-135 | 2-35            | AGCTGATTTTCGCTAAAGTCCAGAGGTGTCTAGTTTATGATAA        |
| U-SSTs-2H-100Column-136 | 2-36            | CGAGAGTATCGGTACCAGAGCGGCCACCACACGAACGCTA           |
| U-SSTs-2H-100Column-137 | 2-37            | TAAATTTCTCACTTCGACATCACTAATTGCTTCACGGCCCAA         |
| U-SSTs-2H-100Column-138 | 2-38            | TATTCTCTCTGGACCTGAGCTGGAAGTTATAGCTTCAGCGTA         |
| U-SSTs-2H-100Column-139 | 2-39            | CGAGCCATACTTCTATTTGCCCTTCGGCCCTGCTTATGGACC         |
| U-SSTs-2H-100Column-140 | 2-40            | TCGGCTGGGAATCGTTAAGGTTGTTTCATACGAGCCGCGGGTA        |
| U-SSTs-2H-100Column-141 | 2-41            | CGGCGATTGTATCGATGAGTTTGTTCATGAGCAAGTGGGTCTT        |
| U-SSTs-2H-100Column-142 | 2-42            | GGCTGGGTGCGTCTGCGTTATGGTACCGTGTAGTACACCCTA         |
| U-SSTs-2H-100Column-143 | 2-43            | CTCTGCCTTCGTGCGATGCGCCAAAGGTAGTAGCCTCAGATC         |

| <b>Seq_ID</b>           | <b>Location</b> | <b>Sequence</b>                             |
|-------------------------|-----------------|---------------------------------------------|
| U-SSTs-2H-100Column-144 | 2-44            | TAGTTCTGCCATACCTACATATTCTGAATGCGTCTTTCCGGT  |
| U-SSTs-2H-100Column-145 | 2-45            | TCCAGAGTTGCGGCCGTAGCGAAGCCTCCCGTCTTCCCCTA   |
| U-SSTs-2H-100Column-146 | 2-46            | CCACTCTAGTACAACATAACCACGATCAGCCCATCCATGTCA  |
| U-SSTs-2H-100Column-147 | 2-47            | GTCTTATCGCTGTTGACGCGGCGTTGACAATAGAGTAAAGAT  |
| U-SSTs-2H-100Column-148 | 2-48            | GTGGGCGTCATTTGGGTGCATACTTGTTACTGGCTTGGGACA  |
| U-SSTs-2H-100Column-149 | 2-49            | AAAGAACGCTCTGCCCAACGATATTGTAATTATCTAACTATT  |
| U-SSTs-2H-100Column-150 | 2-50            | CTTGAGTAGGCCCGGAGGAGACTCGGCCAAATGGTGGATTAAA |
| U-SSTs-2H-100Column-151 | 2-51            | ACCTGTGTCATCACAGAGTGGGCAAGCAGTCGTATGGTAGCC  |
| U-SSTs-2H-100Column-152 | 2-52            | CTATTCGCTTGTCTTAGCCTTTGGATCCGATCAAAGGCCCTC  |
| U-SSTs-2H-100Column-153 | 2-53            | CGTCGTCTGCATGCCTTAGCTCACCTGGTACAGACCAACACT  |
| U-SSTs-2H-100Column-154 | 2-54            | ACGACTCGTAACGCGAAAGGTACGGCACTCGCAGGCGATCTA  |
| U-SSTs-2H-100Column-155 | 2-55            | CACGGCGACCGGACGAACAGCCGTCTTTAGGACAGCGTATCA  |
| U-SSTs-2H-100Column-156 | 2-56            | AGGGATGGGAACAGGCAACCCTACACAGGGCCCCGCTGTTCTG |
| U-SSTs-2H-100Column-157 | 2-57            | GTTAGCTAGTCAACCAACTCGCGCAAGATGCTCTGGGCCCTA  |
| U-SSTs-2H-100Column-158 | 2-58            | ATCGTCGGTCCCTCAGGCCTAAGTAACTAGGCTGGTGTGCTCG |
| U-SSTs-2H-100Column-159 | 2-59            | AGGAATCTTGATTGGACCCCTCAAGCCATAGAGTTGAGAGG   |
| U-SSTs-2H-100Column-160 | 2-60            | ATTGACCCCTCGCGTGTCTCTTCAATGCTTTGGCTTATTAAA  |
| U-SSTs-2H-100Column-161 | 2-61            | ACAGAACC GCGGATGGCGTTACCGTCTATGGTCAGATGTCAA |
| U-SSTs-2H-100Column-162 | 2-62            | TGGAAGACTATTTATCCCTAGCTGGTACTAGCAGTTGGTAT   |
| U-SSTs-2H-100Column-163 | 2-63            | TGCCGGCGTTAATAGGTCTTTCACAGATGAGACAGTACCTTG  |
| U-SSTs-2H-100Column-164 | 2-64            | CCTAATTCCGTTCCCTGGAATCTGGTATTGACTAGAGCCCCGG |
| U-SSTs-2H-100Column-165 | 2-65            | TCTTAGATCCGACGAGTTACGTTAAGCTTCCGAGACTTGGGT  |
| U-SSTs-2H-100Column-166 | 2-66            | CCGAGAGCATTTCTTTACCAATCCCACCTACGCATCTCTAGGG |
| U-SSTs-2H-100Column-167 | 2-67            | CGTTACTGTTTATCTGAGACCTACGGACCGCTACTAGGAGCT  |
| U-SSTs-2H-100Column-168 | 2-68            | AGTATGGGAAGGAAGCGGCACATGGCTCCAGCGTAGCTGGGC  |
| U-SSTs-2H-100Column-169 | 2-69            | TGCTGTGAGGCACAGCCCTATCCCACGTTACCTTGACGAGGA  |
| U-SSTs-2H-100Column-170 | 2-70            | CACCCGCACAACAGGGAGGGACATTCAGTTTGCTACACCGTT  |
| U-SSTs-2H-100Column-171 | 2-71            | ATGAAGTCGATTTGGCTCTGCAGTACTATTGATCGCCCACAT  |
| U-SSTs-2H-100Column-172 | 2-72            | TTCTCTCGTCCGTGGATGAAGCGTATTGCATATGAAATATGG  |
| U-SSTs-2H-100Column-173 | 2-73            | CTCAAATACACCTGGCTAAGCTAACTCACAGTCTCACCCGAG  |
| U-SSTs-2H-100Column-174 | 2-74            | CCTTAAAGAACTACTTAGCGCTTTCTTGGCGGCTCGAAGCC   |
| U-SSTs-2H-100Column-175 | 2-75            | GGTTCTTCGCAAGAGTGCGCTGGTGGTTCGCTACACACCCTTT |
| U-SSTs-2H-100Column-176 | 2-76            | AAAGGGTACATTGCATCATAGACTCTACAAAGTCAGTCTTCT  |
| U-SSTs-2H-100Column-177 | 2-77            | GTGCAGCAACGTAAGTGCCAGTTCCAGACCTTCGCCGTAAG   |
| U-SSTs-2H-100Column-178 | 2-78            | CTTGGGCTGTAACGCTGCGAAGTAGGACATCAATATCGTACG  |
| U-SSTs-2H-100Column-179 | 2-79            | GTTAGAGGCTTAAATGTACTCAATAAATCTAGCCATCCAGCC  |
| U-SSTs-2H-100Column-180 | 2-80            | ATTCTAGACTAAGATAACAGTCCATGCCGGCTGATAGACTTC  |
| U-SSTs-2H-100Column-181 | 2-81            | GTCTCGCTGGGCCTATACTGGATAGATATACTAAGTTCAGAT  |
| U-SSTs-2H-100Column-182 | 2-82            | CGGGCATACCCATCATCAGGGCGGACATACGACTTCGGTGAG  |
| U-SSTs-2H-100Column-183 | 2-83            | AAACCTGTTTGC GGAATGGGTAAACCCGTGTGCCGCCGTGGC |
| U-SSTs-2H-100Column-184 | 2-84            | GGACCATCATGTCCGCATGCCATCCCATCGATCGAATGCTAT  |
| U-SSTs-2H-100Column-185 | 2-85            | CTCCGCAGGCAGACTGGGTCAAGGTGGACGATTAATTAAACT  |
| U-SSTs-2H-100Column-186 | 2-86            | TCTTTAGATGTAATACGGCAAACGTTTCAATAACAAGCCTCG  |
| U-SSTs-2H-100Column-187 | 2-87            | GAATAAACTTCAGAAGCTACGGTCGTACATTCGGCGACAGAG  |
| U-SSTs-2H-100Column-188 | 2-88            | TAACGTTGTATGCCGTCTCTCGCCATATCATCCCGTACTTTG  |
| U-SSTs-2H-100Column-189 | 2-89            | ATTGTTTTAAGTAGCACAGAAATATCTCCTCGTTGTTTATTAC |
| U-SSTs-2H-100Column-190 | 2-90            | TGCCACTCAGGATTAGCGTCTGGCCTTTCCGGCGGACTTAGA  |
| U-SSTs-2H-100Column-191 | 2-91            | CTAATGGTCTCTTGGCTTCCAAATACGGTCCGCGGGAATTAC  |

| <b>Seq_ID</b>           | <b>Location</b> | <b>Sequence</b>                             |
|-------------------------|-----------------|---------------------------------------------|
| U-SSTs-2H-100Column-192 | 2-92            | AAGAACTGATCGGAGCGAGAGAGGGACCTTAGCGGGTCAAAC  |
| U-SSTs-2H-100Column-193 | 2-93            | TCCAGTCGCCACCTGCTTCCTAAGTCCCGCCGAGACACCAG   |
| U-SSTs-2H-100Column-194 | 2-94            | AAACGCTTGTGAGCTAACCGCATCTGCGGGTTACCTAAGTGT  |
| U-SSTs-2H-100Column-195 | 2-95            | CGACTAGCGAAAGTTCATCAATTATTTAAACGCGCGGTAGTG  |
| U-SSTs-2H-100Column-196 | 2-96            | CATCGTCTCGTTGAGGCAATTATCCTGGTCCCTACCACTGAGC |
| U-SSTs-2H-100Column-197 | 2-97            | GAGCGTAGGAGGGTTCTACCCTACCCAGCTCTGAAGAAAGTT  |
| U-SSTs-2H-100Column-198 | 2-98            | TTATCTGGATTTAGACGACAATGTGGCGCAATGCTGCGTACC  |
| U-SSTs-2H-100Column-199 | 2-99            | CTTCCCGACCTGTCGGGATAGGCCGCGGTGCTGGAAACGTA   |
| U-SSTs-2H-100Column-200 | 2-100           | CCCACCGGCACAATTAACAAAGCGAAATTC AACAGTCAAT   |

**U2-SSTs-12H**

| <b>Seq_ID</b>  | <b>Location</b> | <b>Sequence</b>                               |
|----------------|-----------------|-----------------------------------------------|
| U2-SSTs-12H-1  | 1-1             | CATGACACTTAAACATCTAATACACGTTTGTACTGCCTACCT    |
| U2-SSTs-12H-2  | 1-2             | TCCGAAAGGTCGGTGGCCTCTGCTCCAGGGACAAGGACAAGG    |
| U2-SSTs-12H-3  | 1-3             | TTCAATATGGGCTGGGACGCCTGTGTCGTACCATTTTCGGAAC   |
| U2-SSTs-12H-4  | 1-4             | CTGGACATGTGGGCATCAAGATAGACCTGGACCAGGACACGC    |
| U2-SSTs-12H-5  | 1-5             | TCATCCTACATCCCTAAAGGTCGTACCACGCCGACAATTTAG    |
| U2-SSTs-12H-6  | 1-6             | GGGTCCGTTCAACGAAAGACTGCTTTGCCCTTTGGTGATGCA    |
| U2-SSTs-12H-7  | 1-7             | CAGGGCGTAGCAAATATTTACGTACCCGTTGTGTCGTCAATG    |
| U2-SSTs-12H-8  | 1-8             | TCTAATGTTATTACCTTGCACGGGCTTCCACCGATACTATA     |
| U2-SSTs-12H-9  | 1-9             | ATCAAGCCGCCTGTGATTATCGGTTTCCAGGTAGACACCGAA    |
| U2-SSTs-12H-10 | 1-10            | GCTGCAGAGCCCTCTTGCACATGGTACCGTGACCTATCGGGC    |
| U2-SSTs-12H-11 | 1-11            | AATTGGTTATCTAAGGACTGGGCACGGAAAGACATCTCCGAC    |
| U2-SSTs-12H-12 | 1-12            | GAAAGGATTATAGAGGACTATATGCGTGCCCTCCGGACGACC    |
| U2-SSTs-12H-13 | 1-13            | GAAAGCAGAATGATTTACTAATTGCTTTGCTGGCTGGCAGCT    |
| U2-SSTs-12H-14 | 1-14            | GCATGCGTGATACTAACTACATAGTAGAGCAAATTTTCAGCCA   |
| U2-SSTs-12H-15 | 1-15            | AACTATCGATGGTTTTTTTTTTTTTTTTTTTTTTTATGCACATAA |
| U2-SSTs-12H-16 | 2-1             | TTTTTTTTTTTTGCGCTAAGCATTAAAGTGTCATGTTTTTTTTTT |
| U2-SSTs-12H-17 | 2-2             | ACGATTTAGGCCACTACTAATCGACCTTTCGGAATTAGATGT    |
| U2-SSTs-12H-18 | 2-3             | CACGGGCTCGAATCGTTAACTGCCCATATTGAAAGAGGCCAC    |
| U2-SSTs-12H-19 | 2-4             | AAACAGGAGAACCCTGAGTCGCCACATGTCCAGGGCGTCCCA    |
| U2-SSTs-12H-20 | 2-5             | CTCATCCCGGGCGTTTGGACCGATGTAGGATGATCTTGATGC    |
| U2-SSTs-12H-21 | 2-6             | GAGCTTGCAGAGTCCCAATGGTTGAACCGACCCACCTTTAGG    |
| U2-SSTs-12H-22 | 2-7             | GAAATTCGATAGCCGTGCGATGCTACGCCCTGAGTCTTTTCG    |
| U2-SSTs-12H-23 | 2-8             | GACTCATGGTCTGTGTCGTCGCAAATAACATTAGAGTAAATATT  |
| U2-SSTs-12H-24 | 2-9             | GCGAGATACACGGTTCAGGATAGGCGCTTGATTTCGCAAGGT    |
| U2-SSTs-12H-25 | 2-10            | CTTAGAACTATCGGAGCGCTCGGGCTCTGCAGCGATAATCAC    |
| U2-SSTs-12H-26 | 2-11            | GGACGATCCTTGTGTCTCCAAGATAACCAATTTGTGCAAGA     |
| U2-SSTs-12H-27 | 2-12            | CTTAGTGGGCAAATAAACGTGTATAATCCTTTCCAGTCCTT     |
| U2-SSTs-12H-28 | 2-13            | GGTAAGTGACGTGTTTAGAATCATTCTGCTTTCATAGTCCTC    |
| U2-SSTs-12H-29 | 2-14            | TAGTATAACCGTCACAGAGGTTATCACGCATGCTTAGTAAAT    |
| U2-SSTs-12H-30 | 2-15            | TTGCAAACCTCAGAATGGCACTCCATCGATAGTTTGTAGTTAG   |
| U2-SSTs-12H-31 | 3-1             | ACGCATATTGCCGGCACCTAAGCCTAAATCGTTGCTTAGCGC    |
| U2-SSTs-12H-32 | 3-2             | GCAGCGGTCCCTGCCAGAACCGTCGAGCCCGTGATTAGTAGTG   |
| U2-SSTs-12H-33 | 3-3             | GGACATTATATGCTGCCATGGTTCTCCTGTTTAGTTAACGAT    |
| U2-SSTs-12H-34 | 3-4             | CACGTGACTCAGTCCTATTATCCCGGATGAGCGACTCAGGG     |
| U2-SSTs-12H-35 | 3-5             | TACACTAATCTTCGAGGCTGCCTCGCAAGCTCGGTCCAAACG    |
| U2-SSTs-12H-36 | 3-6             | TTGAGGTTGGAGGACATATCCATCGGAATTTCCCATTTGGGAC   |
| U2-SSTs-12H-37 | 3-7             | GAGCTCGGACGCGTCCGCGTGGACCATGAGTCTCGCACGGCT    |
| U2-SSTs-12H-38 | 3-8             | GCTTAGTCGCCGAGAAAGATAGTGTATCTCGCTGGCACGACA    |
| U2-SSTs-12H-39 | 3-9             | ACGGTAGACTCTCGTGCTTGGATAGTTCTAAGATCCTGAACC    |
| U2-SSTs-12H-40 | 3-10            | TCGCCCTACTGTTTACAGTTGAAGGATCGTCCGAGCGCTCCG    |
| U2-SSTs-12H-41 | 3-11            | CTTTCGTAACAGTCCTCGTTCTGCCACTAAGTGGGAGACAC     |
| U2-SSTs-12H-42 | 3-12            | TGGAAACGGTGTGGCGCCCATCGTCACTTACCCACGTTTATT    |
| U2-SSTs-12H-43 | 3-13            | TATGCGAGTTTAAATGGGCTCTCGGTTATACTAATTTCTAAACA  |
| U2-SSTs-12H-44 | 3-14            | AGGACACACAGCTTTCCTGCTGAGTTTGCAAACCTCTGTGA     |
| U2-SSTs-12H-45 | 3-15            | CAGTCCAAGGCGTTTTTTTTTTTTTTTTTTTTTTTAGTGCCATTC |
| U2-SSTs-12H-46 | 4-1             | TTTTTTTTTTTTCTTCATTCTCGGCAATATGCGTTTTTTTTTTT  |

| <b>Seq_ID</b>  | <b>Location</b> | <b>Sequence</b>                              |
|----------------|-----------------|----------------------------------------------|
| U2-SSTs-12H-47 | 4-2             | GACGGGCGGGACTGTTGGAGTCAGGACCGCTGCTTAGGTGCC   |
| U2-SSTs-12H-48 | 4-3             | GTAAGATCGTTTACCCTAGTTCATATAATGTCCCGTTCTGG    |
| U2-SSTs-12H-49 | 4-4             | CCCATAGTTTGAGGGTTCCTACTGAGTCACGTGCCATGGCAG   |
| U2-SSTs-12H-50 | 4-5             | AGATGCGCTCATAACATCTCAAAGATTAGTGTAATAATAGGA   |
| U2-SSTs-12H-51 | 4-6             | TACGGTTCGAGATTAATTCTACTCCAACCTCAAGCAGCCTCG   |
| U2-SSTs-12H-52 | 4-7             | GACTCTGAACCCTACCTAAGTGCGTCCGAGCTCGGATATGTC   |
| U2-SSTs-12H-53 | 4-8             | ACGTGACATAAGCATCAACCTCGGGACTAAGCCACGCGGAC    |
| U2-SSTs-12H-54 | 4-9             | TCTTTAGCATGCATCGTGTAGAGAGTCTACCGTTATCTTTCT   |
| U2-SSTs-12H-55 | 4-10            | GGCGTTATCATTAGATTTACCACAGTAGGGCGACCAAGCAGG   |
| U2-SSTs-12H-56 | 4-11            | CTGTGCGGGCGAACGACTTAGGCTGTTACGAAAGCAACTGTAA  |
| U2-SSTs-12H-57 | 4-12            | TTTCTTTATGCCGCGTATTTACACCGTTTCCAGAACGAGGA    |
| U2-SSTs-12H-58 | 4-13            | GACTTTGGCTTCCTTGACGCTTAAACTCGCATAATGGGCGCC   |
| U2-SSTs-12H-59 | 4-14            | GCAGATCCAATCGTTATTCAGCTGTGTGTCTAGAGCCCAT     |
| U2-SSTs-12H-60 | 4-15            | CACCCTTAGACGAGAGTTGTACGCCCTTGACTGGCAGGGAAA   |
| U2-SSTs-12H-61 | 5-1             | CTTAGTATAGGCCTTCTCGCTTCCCGCCGTCGAGAATGAAG    |
| U2-SSTs-12H-62 | 5-2             | CTTAGGTTGCGAGGTGTTCTTAACGATCTTACACTCCAACAG   |
| U2-SSTs-12H-63 | 5-3             | TCTCTTATGAGTGCAGTCTGCAAACCTATGGGAACCTAGGGTA  |
| U2-SSTs-12H-64 | 5-4             | TCTTCTAAATGCGACCGGTACTGAGCGCATCTTGGGAACCCT   |
| U2-SSTs-12H-65 | 5-5             | CCTTAAGCTGGGCCAAGGTATCTGCGACCGTATGAGATGTTA   |
| U2-SSTs-12H-66 | 5-6             | AAATGATGCTCTATACAAAGCGGTTTACAGAGTCTAGAATTAAT |
| U2-SSTs-12H-67 | 5-7             | CGTCGCCCTTGAGGGTCTGCCTTATGTCACGTACTTAGGTAG   |
| U2-SSTs-12H-68 | 5-8             | AACAATATTGGCGACTGTCGTCATGCTAAAGAAGGTTGATGC   |
| U2-SSTs-12H-69 | 5-9             | TTACCGAGGTAGACTTTCATATGATAACGCCCTACACGATG    |
| U2-SSTs-12H-70 | 5-10            | TTAATCATGTTGGTACTACGTTTCGCCCACAGGGTAAATCTA   |
| U2-SSTs-12H-71 | 5-11            | TACGTGGAGGTGCGTAAGGCAGCATAAAGAAACCTAAGTCGT   |
| U2-SSTs-12H-72 | 5-12            | GTCGCGCATCGTTAAGCCCGTAAGCCAAAGTCGAAATACGCG   |
| U2-SSTs-12H-73 | 5-13            | CCATGCATCGGCTGTAGTCCAATTGGATCTGCAGCGTCAAGG   |
| U2-SSTs-12H-74 | 5-14            | GGGCCTATTCATGGTCTACTGTCTAAGGGTGTGGAATAACG    |
| U2-SSTs-12H-75 | 5-15            | GTATTATCGATATTTTTTTTTTTTTTTTTTTTACAACCTCTC   |
| U2-SSTs-12H-76 | 6-1             | TTTTTTTTTTTTTACTACTCCCGCCTATACTAAGTTTTTTTTTT |
| U2-SSTs-12H-77 | 6-2             | GCTTCCATATTGTATACTGTATCGCAACCTAAGAGCGAGAAG   |
| U2-SSTs-12H-78 | 6-3             | GCAGAGTAGTAGACCATCGAAACTCATAAGAGAAGGAACACC   |
| U2-SSTs-12H-79 | 6-4             | GCTACTTTCACCCTTTAGCGAGCATTTAGAAGACAGGACTGC   |
| U2-SSTs-12H-80 | 6-5             | AAGCGCAAAGAACGGCCCATGCCAGCTTAAGGGTACCGGTC    |
| U2-SSTs-12H-81 | 6-6             | CGTCTCATGTCGCCCTCGCTAAGAGCATCATTTATACCTTGG   |
| U2-SSTs-12H-82 | 6-7             | CTCTATCCACCCTTCGTAGGACTCAAGGCGACGGCTTTGTAT   |
| U2-SSTs-12H-83 | 6-8             | TTTAGTTGAACTCGAGTGAAGCCAATATTGTTGGCAGGACC    |
| U2-SSTs-12H-84 | 6-9             | AGCCAGGATCAACCAACTCTGCTACCTCGGTAAACGACAGTC   |
| U2-SSTs-12H-85 | 6-10            | CAAGGAAAGCATTTCCTGCTCAACATGATTAAGTGAAAGT     |
| U2-SSTs-12H-86 | 6-11            | GGCTAAGCGTTGCGAACTCCGCACCTCCACGTAACGTAGTAC   |
| U2-SSTs-12H-87 | 6-12            | ATGACTGTTTCACACTGGAGCACGATGCGCGACTGCCTTACG   |
| U2-SSTs-12H-88 | 6-13            | TTCCAAATCCACAAGTGAAGGGCCGATGCATGGACGGGCTTA   |
| U2-SSTs-12H-89 | 6-14            | AACCTACGGTCTGTACCCTATATGAATAGGCCCTGGACTACA   |
| U2-SSTs-12H-90 | 6-15            | TTGCTCAATTTACACGCAGATTATCGATAATACAGTAGGACC   |
| U2-SSTs-12H-91 | 7-1             | GGACTCGGTAGCGTTTAATTGAATATGGAAGCCGGGAGTATG   |
| U2-SSTs-12H-92 | 7-2             | AGCTTTATCGACTCGAGTCTCTACTACTCTGCTACAGTATAC   |
| U2-SSTs-12H-93 | 7-3             | ACAGATCGACGTTTAGGGTATGTGAAAGTAGCTTCGATGGTC   |

| <b>Seq_ID</b>   | <b>Location</b> | <b>Sequence</b>                              |
|-----------------|-----------------|----------------------------------------------|
| U2-SSTs-12H-94  | 7-4             | ATTAGCGATTGAGAAGCTGTTTCTTTGCGCTTTCGCTAAAGG   |
| U2-SSTs-12H-95  | 7-5             | GTCTAAGCCGATAGTAGATAGGACATGAGACGCATGGGCCGT   |
| U2-SSTs-12H-96  | 7-6             | GGCTGTAAAGAACAAATGTTGGTGGATAGAGTAGCGAGGGC    |
| U2-SSTs-12H-97  | 7-7             | GACATGCGCCAGGTGGTAGGAGTTCAACTAAATCCTACGAAG   |
| U2-SSTs-12H-98  | 7-8             | ATTGAAGTGCCTCCCTGCGTGTGATCCTGGCTCTTCACTCGA   |
| U2-SSTs-12H-99  | 7-9             | AAAGCGACCTAATTCTAATAGTGCTTTCCTTGCAAGTTGGT    |
| U2-SSTs-12H-100 | 7-10            | CGGACACCAGATGCTGATCTCAACGCTTAGCCAGCAGGGAAA   |
| U2-SSTs-12H-101 | 7-11            | GCGCTATCTGCTCAGTATCTAGAAACAGTCATCGGAGTTCGC   |
| U2-SSTs-12H-102 | 7-12            | GGCCGCGTTCGACTAGACCCGTGGATTTGGAAGCTCCAGTGT   |
| U2-SSTs-12H-103 | 7-13            | CTAAGGACGTACTATAACCCTCGACCGTAGGTTCTTCACTTG   |
| U2-SSTs-12H-104 | 7-14            | CTGGAAGTCCGCTATCCCGCAAATTGAGCAAATAGGGTACA    |
| U2-SSTs-12H-105 | 7-15            | CTGTATCATATCTTTTTTTTTTTTTTTTTTTTTATCTGCGTGT  |
| U2-SSTs-12H-106 | 8-1             | TTTTTTTTTTTTAATGCCCATCGCTACCGAGTCCTTTTTTTTT  |
| U2-SSTs-12H-107 | 8-2             | AGCAATACTTTCTGTGGGAGGGTCGATAAAGCTCAATTAAC    |
| U2-SSTs-12H-108 | 8-3             | AGAGCTGAGTGTTTACACGGCACGTCGATCTGTGAGACTCGA   |
| U2-SSTs-12H-109 | 8-4             | TGCCAAGAGTCCATAACCGTGCTCAATCGCTAATATACCCTAA  |
| U2-SSTs-12H-110 | 8-5             | CATAACCAACAATTTAGTTGTATCGGCTTAGACAACAGCTTC   |
| U2-SSTs-12H-111 | 8-6             | GAATTATCAATGCAACGAGCTTCTTTACAGCCCTATCTACT    |
| U2-SSTs-12H-112 | 8-7             | ACGCGCGGGCCTGTCCGAGCCCTGGCGCATGTCAACAATTTG   |
| U2-SSTs-12H-113 | 8-8             | TCTAGTGCATACAAATTCGGTACGCACTTCAATTCCTACCAC   |
| U2-SSTs-12H-114 | 8-9             | TAATTGCATTGCAGTAGGCTCTTAGGTCGCTTTCACGCAGGG   |
| U2-SSTs-12H-115 | 8-10            | GTTTCTGTTCGATACCGATGGATCTGGTGTCCGCTATTAGAA   |
| U2-SSTs-12H-116 | 8-11            | GACGCGGGCGTACAAATTCGCAGCAGATAGCGCGAGATCAGC   |
| U2-SSTs-12H-117 | 8-12            | GTAGGAAACTAACGCTCTTGATCGAACGCGGCCTAGATACTG   |
| U2-SSTs-12H-118 | 8-13            | TTTAAGAAGCTGAGCGTAGCTGTACGTCCTTAGCGGGTCTAG   |
| U2-SSTs-12H-119 | 8-14            | CAATTATAGTAATGGTAACCACGGAACCTCCAGGAGGGTATA   |
| U2-SSTs-12H-120 | 8-15            | CTTTCAGTGATAGATGAAAGAGATATGATACAGGCGGGATAG   |
| U2-SSTs-12H-121 | 9-1             | CTGCTTATCCAGACCATTTCCAAAGTATTGCTGATGGGCATT   |
| U2-SSTs-12H-122 | 9-2             | ACAGTCCCGTCTACGGGCCAGCACTCAGCTCTCCTCCACAG    |
| U2-SSTs-12H-123 | 9-3             | GCGTGGTACGTAGCCGGAGCAGACTCTTGGCAGCCGTGTAAA   |
| U2-SSTs-12H-124 | 9-4             | TGTATTTCTACAACCTGTACGTGTTGGTTATGGCACGGTATG   |
| U2-SSTs-12H-125 | 9-5             | CATGCATGTCTAACGTCGCGATTGAATAATTCACAATAAAT    |
| U2-SSTs-12H-126 | 9-6             | GGTCTTCTACTGTAGGAGGACGGCCCGCGCGTGCTCGTTGCA   |
| U2-SSTs-12H-127 | 9-7             | GCATCTTTCAGCGCTCAATCATATGCACTAGAGGCTCCGACA   |
| U2-SSTs-12H-128 | 9-8             | CCCTGAAACTCTACAGAGGGCCAATGCAATTAACCGAATTTG   |
| U2-SSTs-12H-129 | 9-9             | CATCTAGAAAGGGCGTTGGGTGGAACAGAAACGAGCCTACTG   |
| U2-SSTs-12H-130 | 9-10            | ATCTTTGATCTGCGGGACATAACGCCCGCGTCCCATCGGTAC   |
| U2-SSTs-12H-131 | 9-11            | TGGTAGTTCCCTTCTTTTCGGCGTAGTTTCCTACGCGAATTTGT |
| U2-SSTs-12H-132 | 9-12            | GAACGAAGGTTTACTGTGACTAGCTTCTTAAATCAAGAGCGT   |
| U2-SSTs-12H-133 | 9-13            | TGGGACAAGACATATACACCTTACTATAATTGAGCTACGCTC   |
| U2-SSTs-12H-134 | 9-14            | GTTGCGACCACGCAAGATAGCATCACTGAAAGTGGTTACCAT   |
| U2-SSTs-12H-135 | 9-15            | CTTTAAGCCGGATTTTTTTTTTTTTTTTTTTTTTCTTTCATCT  |
| U2-SSTs-12H-136 | 10-1            | TTTTTTTTTTTTGCGGGCGAAACTGGATAAGCAGTTTTTTTTTT |
| U2-SSTs-12H-137 | 10-2            | GTACCAGCTGGTGTGATAGAGACGGGACTGTGGAAATGGT     |
| U2-SSTs-12H-138 | 10-3            | TAGAGGGCTATTGGAGGGAGTTACGTACCACGCCTGGCCCGT   |
| U2-SSTs-12H-139 | 10-4            | TGGATGTTTAGGGCGGACAGTTGTAGAAATACATGCTCCGGC   |
| U2-SSTs-12H-140 | 10-5            | TCTGTATTGGACCCTATGAAATAGACATGCATGCGTACAAGT   |



| <b>Seq_ID</b>   | <b>Location</b> | <b>Sequence</b>                                 |
|-----------------|-----------------|-------------------------------------------------|
| U2-SSTs-12H-141 | 10-6            | GGCCCTTTAATAAACCTAGGCCAGTAGAAGACCTCGCGACGT      |
| U2-SSTs-12H-142 | 10-7            | TTGGTCCTCATCAGAGATGCGGCTGAAAGATGCGTCCTCCTA      |
| U2-SSTs-12H-143 | 10-8            | CGAGCGGGCATTATAGCGACAGAGTTTCAGGGTGATTGAGC       |
| U2-SSTs-12H-144 | 10-9            | AGCATGTAGTGGGCCGTGGAGCCTTCTAGATGGCCCTCTGT       |
| U2-SSTs-12H-145 | 10-10           | GAAGTCGTTTATTATTAGTCCACAGATCAAAGATACCCAACGC     |
| U2-SSTs-12H-146 | 10-11           | GGTGCAGGAGGAGCAGACTCAAAGGAACTACCATATGTCCCG      |
| U2-SSTs-12H-147 | 10-12           | TTACTTGCTTCATTTAGCGATAAACCTTCGTTCCGCCGAAAG      |
| U2-SSTs-12H-148 | 10-13           | GGCAATTAGAGAATTGTATCCTGTCTTGTCCCAAGTCACAGT      |
| U2-SSTs-12H-149 | 10-14           | CTTACGCTGAAGCGCCTTTAGCGTGGTTCGCAACAGGTGTATA     |
| U2-SSTs-12H-150 | 10-15           | CCAAAGACGAAAGACCGTTTATCCGGCTTAAAGGCTATCTTG      |
| U2-SSTs-12H-151 | 11-1            | TTCTAAAGTGGCTCTAATCGACCAGCTGGTACTTTCGCCCCGC     |
| U2-SSTs-12H-152 | 11-2            | CAGAAGGTGATAACTTCCAAGATAGCCCTCTACTATCAAGCA      |
| U2-SSTs-12H-153 | 11-3            | GCCTCGCCCTGTCTGACTCGTCTAAACATCCAACCTCCCTCCA     |
| U2-SSTs-12H-154 | 11-4            | CTGAAGCTCCCTCGACACGTGTCCAATACAGAAGTGTCCGCC      |
| U2-SSTs-12H-155 | 11-5            | CAGCGGAGTCTATATCTACGTATTAAAGGGCCTTTCATAGGG      |
| U2-SSTs-12H-156 | 11-6            | GACCCACTAAGTGGTTTCCGCATGAGGACCAAGCCTAGGTTT      |
| U2-SSTs-12H-157 | 11-7            | GACTGTGCTCCCTGGACCCGAATGCCCGCTCGCGCATCTCTG      |
| U2-SSTs-12H-158 | 11-8            | TGAGGTACAGCGTTTCGTGTCACTACATGCTGTGCTGCTATAA     |
| U2-SSTs-12H-159 | 11-9            | GAGTAGCATTAGGCACAGCAGTAAACGACTTCCTCCACGGCC      |
| U2-SSTs-12H-160 | 11-10           | TGCTGCGTCGTGCGTGCTTCTCCTCCTGCACCTGACTAATAA      |
| U2-SSTs-12H-161 | 11-11           | CGTTGGCAGCACTTCTACCTAGAAGCAAGTAATGAGTCTGCT      |
| U2-SSTs-12H-162 | 11-12           | AATTCTCGTGC GCGGGTGAGTCTCTAATTGCCATCGCTAAAT     |
| U2-SSTs-12H-163 | 11-13           | TGGTAGAAAGAAGGGAGGCTCTTCAGCGTAAGGGATACAATT      |
| U2-SSTs-12H-164 | 11-14           | GACCCAGGGTTAGTTCCGGAGTTCGTCTTTGGCTAAAGGCGC      |
| U2-SSTs-12H-165 | 11-15           | ACTTCGTGCTTGT TTTTTTTTTTTTTTTTTTTTTTTTAAACGGTCT |
| U2-SSTs-12H-166 | 12-1            | TTTTTTTTTTTTTAGGTAGGCAGGCCACTTTAGAATTTTTTTTTT   |
| U2-SSTs-12H-167 | 12-2            | TACAAACGTGTCCTTGTCTTTATCACCTTCTGTGCTGATTAGA     |
| U2-SSTs-12H-168 | 12-3            | GTCCCTGGAGCGTTCGAAATACAGGGCGAGGCCCTTGGAAGT      |
| U2-SSTs-12H-169 | 12-4            | GGTACGACACAGCGTGTCTGAGGGAGCTTCAGACGAGTCAG       |
| U2-SSTs-12H-170 | 12-5            | GTCCAGGTCTACTAAATTGTCTAGACTCCGCTGCACGTGTGCG     |
| U2-SSTs-12H-171 | 12-6            | GGCGTGGTACGTGCATCACC AACTTAGTGGGTCACGTAGATA     |
| U2-SSTs-12H-172 | 12-7            | AAGGGCAAAGCCATTGACGACGGGAGCACAGTCGCGGAAACC      |
| U2-SSTs-12H-173 | 12-8            | ACAACGGGTACTATAGTATCGCGCTGTACCTCATCGGGTCCA      |
| U2-SSTs-12H-174 | 12-9            | GTGGAAGCCCGTTCCGGTGTCTCTAATGCTACTCTGACACGAA     |
| U2-SSTs-12H-175 | 12-10           | ACCTGGA AACC GCCCGATAGGCACGACGCAGCACTGCTGTGC    |
| U2-SSTs-12H-176 | 12-11           | TCACGGTACCAGTCCGAGATGGTGTGCTGCCAACGAGAAGCACG    |
| U2-SSTs-12H-177 | 12-12           | TCTTTCCGTGCGGTCCGTCGGGCGCACGAGAATTTAGGTAGAA     |
| U2-SSTs-12H-178 | 12-13           | AGGGCACGCATAGCTGCCAGCTTCTTTCTACCAACTCACCCG      |
| U2-SSTs-12H-179 | 12-14           | CAGCAAAGCAATGGCTGAAATTAACCCTGGGTCGAGCCTCCC      |
| U2-SSTs-12H-180 | 12-15           | TTGCTCTACTATTATGTGCATCAAGCACGAAGTCTCCGGAAC      |

**U2-SSTs-8H**

| <b>Seq_ID</b> | <b>Location</b> | <b>Sequence</b>                                 |
|---------------|-----------------|-------------------------------------------------|
| U2-SSTs-8H-1  | 1-1             | CTTAGTATAGGCCTTCTCGCTACACGTTTGTACTGCCTACCT      |
| U2-SSTs-8H-2  | 1-2             | CTTAGGTTGCGAGGTGTTCC TGCTCCAGGGACAAGGACAAGG     |
| U2-SSTs-8H-3  | 1-3             | TCTCTTATGAGTGCAGTCC TGTGTGTCGTACCATTTTCGGAAC    |
| U2-SSTs-8H-4  | 1-4             | TCTTCTAAATGCGACCGGTACTAGACCTGGACCAGGACACGC      |
| U2-SSTs-8H-5  | 1-5             | CCTTAAGCTGGGCCAAGGTATCGTACCACGCCGACAATTTAG      |
| U2-SSTs-8H-6  | 1-6             | AAATGATGCTCTATACAAAGCGCTTTGCCCTTTGGTGATGCA      |
| U2-SSTs-8H-7  | 1-7             | CGTCGCCTTGAGGGTCC TGCCGTACCCGTTGTGTGTCGCAATG    |
| U2-SSTs-8H-8  | 1-8             | AACAATATTGGCGACTGTCGTCGGGCTTCCACC GATACTATA     |
| U2-SSTs-8H-9  | 1-9             | TTACCGAGGTAGACTTTTCACTGGTTTCCAGGTAGACACCGAA     |
| U2-SSTs-8H-10 | 1-10            | TTAATCATGTTGGTACTACGTTGGTACCGTGACCTATCGGGC      |
| U2-SSTs-8H-11 | 1-11            | TACGTGGAGGTGCGTAAGGCAGCACGGAAAGACATCTCCGAC      |
| U2-SSTs-8H-12 | 1-12            | GTCGCGCATCGTTAAGCCCGTATGCGTGCCCTCCGGACGACC      |
| U2-SSTs-8H-13 | 1-13            | CCATGCATCGGCTGTAGTCCATTGCTTTGCTGGCTGGCAGCT      |
| U2-SSTs-8H-14 | 1-14            | GGGCCTATTCATGGTCC TACTTAGTAGAGCAAATTT CAGCCA    |
| U2-SSTs-8H-15 | 1-15            | GTATTATCGATATTTTTTTTTTTTTTTTTTTTTTTTATGCACATAA  |
| U2-SSTs-8H-16 | 2-1             | TTTTTTTTTTTTTTCATACTCCCGGCCTATACTAAGTTTTTTTTTTT |
| U2-SSTs-8H-17 | 2-2             | GCTTCCATATTGTATACTGTATCGCAACCTAAGAGCGAGAAG      |
| U2-SSTs-8H-18 | 2-3             | GCAGAGTAGTAGACCATCGAAACTCATAAGAGAAGGAACACC      |
| U2-SSTs-8H-19 | 2-4             | GCTACTTTTACCCTTTAGCGAGCATTTAGAAGACAGGACTGC      |
| U2-SSTs-8H-20 | 2-5             | AAGCGCAAAGAACGGCCCATGCCCAGCTTAAGGGTACCGGTC      |
| U2-SSTs-8H-21 | 2-6             | CGTCTCATGTGCGCCCTCGCTAAGAGCATATTTATACTTTGG      |
| U2-SSTs-8H-22 | 2-7             | CTCTATCCACCCTTCGTAGGACTCAAGGCGACGGCTTTGTAT      |
| U2-SSTs-8H-23 | 2-8             | TTTAGTTGAACTCGAGTGAAGGCCAATATTGTTGGCAGGACC      |
| U2-SSTs-8H-24 | 2-9             | AGCCAGGATCAACCAACTCTGCTACCTCGGTAAACGCAGTC       |
| U2-SSTs-8H-25 | 2-10            | CAAGGAAAGCATTTCCCTGCTCAACATGATTAAAGTGAAAGT      |
| U2-SSTs-8H-26 | 2-11            | GGCTAAGCGTTGCGAACTCCGCACCTCCACGTAACGTAGTAC      |
| U2-SSTs-8H-27 | 2-12            | ATGACTGTTT CACTGGAGCACGATGCGCGACTGCC TTACG      |
| U2-SSTs-8H-28 | 2-13            | TTCCAAATCCACAAGTGAAGGGCCGATGCATGGACGGGCTTA      |
| U2-SSTs-8H-29 | 2-14            | AACCTACGGTCTGTACCCTATATGAATAGGCCCTGGACTACA      |
| U2-SSTs-8H-30 | 2-15            | TTGCTCAATTTACACGCAGATTATCGATAATACAGTAGGACC      |
| U2-SSTs-8H-31 | 3-1             | GGACTCGGTAGCGTTTAAATTGAATATGGAAGCCGGGAGTATG     |
| U2-SSTs-8H-32 | 3-2             | AGCTTTTATCGACTCGAGTCTCTACTACTCTGCTACAGTATAC     |
| U2-SSTs-8H-33 | 3-3             | ACAGATCGACGTTT AGGGTATGTGAAAGTAGCTTCGATGGTC     |
| U2-SSTs-8H-34 | 3-4             | ATTAGCGATTGAGAAGCTGTTTCTTTGCGCTTTTCGCTAAAGG     |
| U2-SSTs-8H-35 | 3-5             | GTCTAAGCCGATAGTAGATAGGACATGAGACGCATGGGCCGT      |
| U2-SSTs-8H-36 | 3-6             | GGCTGTAAAGAACA AATTGTTGGTGGATAGAGTAGCGAGGGC     |
| U2-SSTs-8H-37 | 3-7             | GACATGCGCCAGGTGGTAGGAGTTCAACTAAATCCTACGAAG      |
| U2-SSTs-8H-38 | 3-8             | ATTGAAGTGCGTCCCTGCGTGTGATCCTGGCTCTTCACTCGA      |
| U2-SSTs-8H-39 | 3-9             | AAAGCGACCTAATTCTAATAGTGCTTTTCCTTGCAGAGTTGGT     |
| U2-SSTs-8H-40 | 3-10            | CGGACACCAGATGCTGATCTCAACGCTTAGCCAGCAGGGAAA      |
| U2-SSTs-8H-41 | 3-11            | GCGCTATCTGCTCAGTATCTAGAAACAGTCATCGGAGTTTCG      |
| U2-SSTs-8H-42 | 3-12            | GGCCGCGTTCGACTAGACCCGTGGATTTGGAAGCTCCAGTGT      |
| U2-SSTs-8H-43 | 3-13            | CTAAGGACGTACTATACCCTCGACCGTAGGTTCCCTTCACTTG     |
| U2-SSTs-8H-44 | 3-14            | CTGGAAGTTCGCTATCCCGCAAATTGAGCAAATAGGGTACA       |
| U2-SSTs-8H-45 | 3-15            | CTGTATCATATCTTTTTTTTTTTTTTTTTTTTTTTTATCTGCGTGT  |
| U2-SSTs-8H-46 | 4-1             | TTTTTTTTTTTTTAAATGCCCATCGCTACCGAGTCCTTTTTTTTTT  |

| <b>Seq_ID</b> | <b>Location</b> | <b>Sequence</b>                              |
|---------------|-----------------|----------------------------------------------|
| U2-SSTs-8H-47 | 4-2             | AGCAATACTTTCTGTGGGAGGGTCGATAAAGCTCAATTA AAC  |
| U2-SSTs-8H-48 | 4-3             | AGAGCTGAGTGTTTACACGGCACGTCGATCTGTGAGACTCGA   |
| U2-SSTs-8H-49 | 4-4             | TGCCAAGAGTCCATAACCGTGCTCAATCGCTAATATAACCCTAA |
| U2-SSTs-8H-50 | 4-5             | CATAACCAACAATTTAGTTGTATCGGCTTAGACAACAGCTTC   |
| U2-SSTs-8H-51 | 4-6             | GAATTATTCAATGCAACGAGCTTCTTTACAGCCCTATCTACT   |
| U2-SSTs-8H-52 | 4-7             | ACGCGCGGGCCTGTGCGGAGCCCTGGCGCATGTCAACAATTTG  |
| U2-SSTs-8H-53 | 4-8             | TCTAGTGCATACAAATTCGGTACGCACTTCAATTCCTACCAC   |
| U2-SSTs-8H-54 | 4-9             | TAATTGCATTGCAGTAGGCTCTTAGGTCGTTTTACAGCAGGG   |
| U2-SSTs-8H-55 | 4-10            | GTTTCTGTTCCGTACCGATGGATCTGGTGTCCGCTATTAGAA   |
| U2-SSTs-8H-56 | 4-11            | GACGCGGGCGTACAAATTCGCAGCAGATAGCGCGAGATCAGC   |
| U2-SSTs-8H-57 | 4-12            | GTAGGAAACTAACGCTCTTGATCGAACGCGGCCCTAGATACTG  |
| U2-SSTs-8H-58 | 4-13            | TTTAAGAAGCTGAGCGTAGCTGTACGTCCTTAGCGGGTCTAG   |
| U2-SSTs-8H-59 | 4-14            | CAATTATAGTAATGGTAACCACGGA ACTTCCAGGAGGGTATA  |
| U2-SSTs-8H-60 | 4-15            | CTTTCAGTGATAGATGAAAAGAGATATGATACAGGCGGGATAG  |
| U2-SSTs-8H-61 | 5-1             | CTGCTTATCCAGACCATTTCCAAAGTATTGCTGATGGGCATT   |
| U2-SSTs-8H-62 | 5-2             | ACAGTCCCCTACGCGCCAGCACTCAGCTCTCCTCCCACAG     |
| U2-SSTs-8H-63 | 5-3             | GCGTGGTACGTAGCCGGAGCAGACTCTTGGCAGCCGTGTA AA  |
| U2-SSTs-8H-64 | 5-4             | TGTATTTCTACA ACTTGTACGTGTTGGTTATGGCACGGTATG  |
| U2-SSTs-8H-65 | 5-5             | CATGCATGTCTAACGTCGCGATTGAATAATTCACA ACTAAAT  |
| U2-SSTs-8H-66 | 5-6             | GGTCTTCTACTGTAGGAGGACGGCCCCGCGCGTGTCTCGTTGCA |
| U2-SSTs-8H-67 | 5-7             | GCATCTTTCAGCGCTCAATCATATGCACTAGAGGCTCCGACA   |
| U2-SSTs-8H-68 | 5-8             | CCCTGAAACTCTACAGAGGGCCAATGCAATTAACCGAATTTG   |
| U2-SSTs-8H-69 | 5-9             | CATCTAGAAAGGGCGTTGGGTGGAACAGAAACGAGCCTACTG   |
| U2-SSTs-8H-70 | 5-10            | ATCTTTGATCTGCGGGACATAACGCCCGCGTCCCATCGGTAC   |
| U2-SSTs-8H-71 | 5-11            | TGGTAGTTCCTTCTTTTCGGCGTAGTTTCTTACGCGAATTTGT  |
| U2-SSTs-8H-72 | 5-12            | GAACGAAGGTTTACTGTGACTAGCTTCTTAAATCAAGAGCGT   |
| U2-SSTs-8H-73 | 5-13            | TGGGACAAGACATATAACCTTACTATAATTGAGCTACGCTC    |
| U2-SSTs-8H-74 | 5-14            | GTTGCGACCACGCAAGATAGCATCACTGAAAGTGGTTACCAT   |
| U2-SSTs-8H-75 | 5-15            | CTTTAAGCCGATTTTTTTTTTTTTTTTTTTTTTTCTTTCATCT  |
| U2-SSTs-8H-76 | 6-1             | TTTTTTTTTTTTGCGGGCGAAACTGGATAAGCAGTTTTTTTTTT |
| U2-SSTs-8H-77 | 6-2             | GTACCAGCTGGTGCTTGATAGAGACGGGACTGTGGAAATGGT   |
| U2-SSTs-8H-78 | 6-3             | TAGAGGGCTATTGGAGGGAGTTACGTACCACGCCTGGCCCCGT  |
| U2-SSTs-8H-79 | 6-4             | TGGATGTTTAGGGCGGACAGTTGTAGAAATACATGCTCCGGC   |
| U2-SSTs-8H-80 | 6-5             | TCTGTATTGGACCCTATGAAATAGACATGCATGCGTACAAGT   |
| U2-SSTs-8H-81 | 6-6             | GGCCCTTTAATAAACCTAGGCCAGTAGAAGACCTCGCGACGT   |
| U2-SSTs-8H-82 | 6-7             | TTGGTCCCTCATCAGAGATGCGGCTGAAAGATGCGTCCCTCCTA |
| U2-SSTs-8H-83 | 6-8             | CGAGCGGGCATTTATAGCGACAGAGTTTCAGGGTGATTGAGC   |
| U2-SSTs-8H-84 | 6-9             | AGCATGTAGTGGGCCGTGGAGCCTTCTTAGATGGCCCTCTGT   |
| U2-SSTs-8H-85 | 6-10            | GAAGTCGTTTATTATTAGTCACAGATCAAAGATACCCAACGC   |
| U2-SSTs-8H-86 | 6-11            | GGTGCAGGAGGAGCAGACTCAAAGGA ACTACCATATGTCCCG  |
| U2-SSTs-8H-87 | 6-12            | TTACTTGCTTCATTTAGCGATAAACCTTCGTTCCGCCGAAAG   |
| U2-SSTs-8H-88 | 6-13            | GGCAATTAGAGAATTGTATCCTGTCTTGTCCCAAGTCACAGT   |
| U2-SSTs-8H-89 | 6-14            | CTTACGCTGAAGCGCCTTTAGCGTGGTCGCAACAGGTGTATA   |
| U2-SSTs-8H-90 | 6-15            | CCAAAGACGAAAGACCGTTTATCCGGCTTAAAGGCTATCTTG   |
| U2-SSTs-8H-91 | 7-1             | TTCTAAAGTGGCTCTAATCGACCAGCTGGTACTTTCGCCCGC   |
| U2-SSTs-8H-92 | 7-2             | CAGAAGGTGATAACTTCCAAGATAGCCCTCTACTATCAAGCA   |
| U2-SSTs-8H-93 | 7-3             | GCCTCGCCCTGTCTGACTCGTCTAAACATCCA ACTCCCTCCA  |

| <b>Seq_ID</b>  | <b>Location</b> | <b>Sequence</b>                             |
|----------------|-----------------|---------------------------------------------|
| U2-SSTs-8H-94  | 7-4             | CTGAAGCTCCCTCGACACGTGTCCAATACAGAACTGTCCGCC  |
| U2-SSTs-8H-95  | 7-5             | CAGCGGAGTCTATATCTACGTATTAAAGGGCCTTTCATAGGG  |
| U2-SSTs-8H-96  | 7-6             | GACCCACTAAGTGGTTTCCGCATGAGGACCAAGCCTAGGTTT  |
| U2-SSTs-8H-97  | 7-7             | GACTGTGCTCCCTGGACCCGAATGCCCGCTCGCGCATCTCTG  |
| U2-SSTs-8H-98  | 7-8             | TGAGGTACAGCGTTCGTGTCACACTACATGCTGTGCTATAA   |
| U2-SSTs-8H-99  | 7-9             | GAGTAGCATTAGGCACAGCAGTAAACGACTTCCTCCACGGCC  |
| U2-SSTs-8H-100 | 7-10            | TGCTGCGTCGTGCGTGCTTCTCCTCCTGCACCTGACTAATAA  |
| U2-SSTs-8H-101 | 7-11            | CGTTGGCAGCACTTCTACCTAGAAGCAAGTAATGAGTCTGCT  |
| U2-SSTs-8H-102 | 7-12            | AATTCTCGTGCGCGGGTGAGTCTCTAATTGCCATCGCTAAAT  |
| U2-SSTs-8H-103 | 7-13            | TGGTAGAAAAGAAGGGAGGCTCTTCAGCGTAAGGGATACAATT |
| U2-SSTs-8H-104 | 7-14            | GACCCAGGGTTAGTTCCGGAGTTCGTCTTTGGCTAAAGGCGC  |
| U2-SSTs-8H-105 | 7-15            | ACTTCGTGCTTGTTTTTTTTTTTTTTTTTTTTTAAACGGTCT  |
| U2-SSTs-8H-106 | 8-1             | TTTTTTTTTTTAGGTAGGCAGGCCACTTTAGAATTTTTTTTTT |
| U2-SSTs-8H-107 | 8-2             | TACAAACGTGTCCTTGTCCTTTATCACCTTCTGTGATTAGA   |
| U2-SSTs-8H-108 | 8-3             | GTCCCTGGAGCGTTCGAAATACAGGGCGAGGCCTTGGAAGT   |
| U2-SSTs-8H-109 | 8-4             | GGTACGACACAGCGTGTCTGAGGGAGCTTCAGACGAGTCAG   |
| U2-SSTs-8H-110 | 8-5             | GTCCAGGTCTACTAAATTGTCTAGACTCCGCTGCACGTGTCG  |
| U2-SSTs-8H-111 | 8-6             | GGCGTGGTACGTGCATCACCACTTAGTGGGTACGCTAGATA   |
| U2-SSTs-8H-112 | 8-7             | AAGGGCAAAGCCATTGACGACGGGAGCACAGTCGCGGAAACC  |
| U2-SSTs-8H-113 | 8-8             | ACAACGGGTACTATAGTATCGCGCTGTACCTCATCGGGTCCA  |
| U2-SSTs-8H-114 | 8-9             | GTGGAAGCCCCTTCGGTGTCTCTAATGCTACTCTGACACGAA  |
| U2-SSTs-8H-115 | 8-10            | ACCTGGAAACCGCCCGATAGGCACGACGCAGCACTGCTGTGC  |
| U2-SSTs-8H-116 | 8-11            | TCACGGTACCAGTCGGAGATGGTGCTGCCAACGAGAAGCACG  |
| U2-SSTs-8H-117 | 8-12            | TCTTTCCGTGCGGTGCTCCGGCGCACGAGAATTTAGGTAGAA  |
| U2-SSTs-8H-118 | 8-13            | AGGGCACGCATAGCTGCCAGTTCCTTTCTACCAACTCACCCG  |
| U2-SSTs-8H-119 | 8-14            | CAGCAAAGCAATGGCTGAAATTAACCCTGGGTGAGCCTCCC   |
| U2-SSTs-8H-120 | 8-15            | TTGCTCTACTATTATGTGCATCAAGCACGAAGTCTCCGGAAC  |

**U2-SSTs-6H**

| <b>Seq_ID</b> | <b>Location</b> | <b>Sequence</b>                                |
|---------------|-----------------|------------------------------------------------|
| U2-SSTs-6H-1  | 1-1             | GGACTCGGTAGCGTTTAAATTGACACGTTTGTACTGCCTACCT    |
| U2-SSTs-6H-2  | 1-2             | AGCTTTATCGACTCGAGTCTCGCTCCAGGGACAAGGACAAGG     |
| U2-SSTs-6H-3  | 1-3             | ACAGATCGACGTTTAGGGTATTGTGTGCTACCATTTTCGGAAC    |
| U2-SSTs-6H-4  | 1-4             | ATTAGCGATTGAGAAGCTGTTTAGACCTGGACCAGGACACGC     |
| U2-SSTs-6H-5  | 1-5             | GTCTAAGCCGATAGTAGATAGCGTACCACGCCGACAATTTAG     |
| U2-SSTs-6H-6  | 1-6             | GGCTGTAAAGAACAAATTGTTGCTTTGCCCTTTGGTGATGCA     |
| U2-SSTs-6H-7  | 1-7             | GACATGCGCCAGGTGGTAGGAGTACCCGTTGTGTGCTCAATG     |
| U2-SSTs-6H-8  | 1-8             | ATTGAAGTGCCTCCCTGCGTGCGGGCTTCCACCGATACTATA     |
| U2-SSTs-6H-9  | 1-9             | AAAGCGACCTAATTCTAATAGGGTTTCCAGGTAGACACCGAA     |
| U2-SSTs-6H-10 | 1-10            | CGGACACCAGATGCTGATCTCTGGTACCGTGACCTATCGGGC     |
| U2-SSTs-6H-11 | 1-11            | GCGCTATCTGCTCAGTATCTAGCACGGAAAGACATCTCCGAC     |
| U2-SSTs-6H-12 | 1-12            | GGCCGCGTTCGACTAGACCCGATGCGTGCCCTCCGGACGACC     |
| U2-SSTs-6H-13 | 1-13            | CTAAGGACGTACTATACCCTCTTGCTTTGCTGGCTGGCAGCT     |
| U2-SSTs-6H-14 | 1-14            | CTGGAAGTTCCGCTATCCCGCTAGTAGAGCAAATTTTCAGCCA    |
| U2-SSTs-6H-15 | 1-15            | CTGTATCATATCTTTTTTTTTTTTTTTTTTTTTTTTATGCACATAA |
| U2-SSTs-6H-16 | 2-1             | TTTTTTTTTTTTAATGCCCATCGCTACCGAGTCCTTTTTTTTTT   |
| U2-SSTs-6H-17 | 2-2             | AGCAATACTTTCTGTGGGAGGGTCGATAAAGCTCAATTAAAC     |
| U2-SSTs-6H-18 | 2-3             | AGAGCTGAGTGTTTACACGGCACGTCGATCTGTGAGACTCGA     |
| U2-SSTs-6H-19 | 2-4             | TGCCAAGAGTCCATAACCGTGCTCAATCGCTAATATACCCTAA    |
| U2-SSTs-6H-20 | 2-5             | CATAACCAACAATTTAGTTGTATCGGCTTAGACAACAGCTTC     |
| U2-SSTs-6H-21 | 2-6             | GAATTATTCAATGCAACGAGCTTCTTTACAGCCCTATCTACT     |
| U2-SSTs-6H-22 | 2-7             | ACGCGCGGGCCTGTCGGAGCCCTGGCGCATGTCAACAATTTG     |
| U2-SSTs-6H-23 | 2-8             | TCTAGTGCATACAAATTCGGTACGCACTTCAATTCCTACCAC     |
| U2-SSTs-6H-24 | 2-9             | TAATTGCATTGCAGTAGGCTCTTAGGTGCTTTTCACGCAGGG     |
| U2-SSTs-6H-25 | 2-10            | GTTTCTGTTCCGTACCGATGGATCTGGTGTCCGCTATTAGAA     |
| U2-SSTs-6H-26 | 2-11            | GACGCGGGCGTACAAATTCGCAGCAGATAGCGCGAGATCAGC     |
| U2-SSTs-6H-27 | 2-12            | GTAGGAAACTAACGCTCTTGATCGAACGCGGCCTAGATACTG     |
| U2-SSTs-6H-28 | 2-13            | TTTAAGAAGCTGAGCGTAGCTGTACGTCCCTTAGCGGGTCTAG    |
| U2-SSTs-6H-29 | 2-14            | CAATTATAGTAATGGTAACCACGGAACCTCCAGGAGGGTATA     |
| U2-SSTs-6H-30 | 2-15            | CTTTCAGTGATAGATGAAAGAGATATGATACAGGCGGGATAG     |
| U2-SSTs-6H-31 | 3-1             | CTGCTTATCCAGACCATTTCCAAAGTATTGCTGATGGGCATT     |
| U2-SSTs-6H-32 | 3-2             | ACAGTCCCGTCTACGGGCCAGCACTCAGCTCTCCTCCCACAG     |
| U2-SSTs-6H-33 | 3-3             | GCGTGGTACGTAGCCGGAGCAGACTCTTGGCAGCCGTGTAAA     |
| U2-SSTs-6H-34 | 3-4             | TGTATTTCTACAACCTTGTACGTGTTGGTTATGGCACGGTATG    |
| U2-SSTs-6H-35 | 3-5             | CATGCATGTCTAACGTGCGGATTGAATAATTCACAATAAAT      |
| U2-SSTs-6H-36 | 3-6             | GGTCTTCTACTGTAGGAGGACGGCCCGCGGTGCTCGTTGCA      |
| U2-SSTs-6H-37 | 3-7             | GCATCTTTCAGCGCTCAATCATATGCACTAGAGGCTCCGACA     |
| U2-SSTs-6H-38 | 3-8             | CCCTGAAACTCTACAGAGGGCCAATGCAATTAACCGAATTTG     |
| U2-SSTs-6H-39 | 3-9             | CATCTAGAAAGGGCGTTGGGTGGAACAGAAACGAGCCTACTG     |
| U2-SSTs-6H-40 | 3-10            | ATCTTTGATCTGCGGGACATAACGCCCGCGTCCCATCGGTAC     |
| U2-SSTs-6H-41 | 3-11            | TGGTAGTTCCCTTCTTTTCGGCGTAGTTTCTTACGCGAATTTGT   |
| U2-SSTs-6H-42 | 3-12            | GAACGAAGGTTTACTGTGACTAGCTTCTTAAATCAAGAGCGT     |
| U2-SSTs-6H-43 | 3-13            | TGGGACAAGACATATACACCTTACTATAAATTGAGCTACGCTC    |
| U2-SSTs-6H-44 | 3-14            | GTTGCGACCACGCAAGATAGCATCACTGAAAGTGGTTACCAT     |
| U2-SSTs-6H-45 | 3-15            | CTTTAAGCCGATTTTTTTTTTTTTTTTTTTTTTTTCTTTCATCT   |
| U2-SSTs-6H-46 | 4-1             | TTTTTTTTTTTTGCGGGCGAAACTGGATAAGCAGTTTTTTTTTT   |

| <b>Seq_ID</b> | <b>Location</b> | <b>Sequence</b>                               |
|---------------|-----------------|-----------------------------------------------|
| U2-SSTs-6H-47 | 4-2             | GTACCAGCTGGTGCTTGATAGAGACGGGACTGTGGAAATGGT    |
| U2-SSTs-6H-48 | 4-3             | TAGAGGGCTATTGGAGGGAGTTACGTACCACGCCTGGCCCGT    |
| U2-SSTs-6H-49 | 4-4             | TGGATGTTTAGGGCGGACAGTTGTAGAAATACATGCTCCGGC    |
| U2-SSTs-6H-50 | 4-5             | TCTGTATTGGACCCTATGAAATAGACATGCATGCGTACAAGT    |
| U2-SSTs-6H-51 | 4-6             | GGCCCTTTAATAAACCTAGGCCAGTAGAAGACCTCGCGACGT    |
| U2-SSTs-6H-52 | 4-7             | TTGGTCCTCATCAGAGATGCGGGCTGAAAGATGCGTCTCCTA    |
| U2-SSTs-6H-53 | 4-8             | CGAGCGGGCATTATATAGCGACAGAGTTTCAGGGTGATTGAGC   |
| U2-SSTs-6H-54 | 4-9             | AGCATGTAGTGGGCCGTGGAGCCTTTCTAGATGGCCCTCTGT    |
| U2-SSTs-6H-55 | 4-10            | GAAGTCGTTTATTATTAGTCACAGATCAAAGATACCCAACGC    |
| U2-SSTs-6H-56 | 4-11            | GGTGCAGGAGGAGCAGACTCAAAGGAACTACCATATGTCCCG    |
| U2-SSTs-6H-57 | 4-12            | TTACTTGCTTCATTTAGCGATAAACCTTCGTTCCGCCGAAAG    |
| U2-SSTs-6H-58 | 4-13            | GGCAATTAGAGAATTGTATCCTGTCTTGTCCCAAGTCACAGT    |
| U2-SSTs-6H-59 | 4-14            | CTTACGCTGAAGCGCCTTTAGCGTGGTCGCAACAGGTGTATA    |
| U2-SSTs-6H-60 | 4-15            | CCAAAGACGAAAGACCGTTTATCCGGCTTAAAGGCTATCTTG    |
| U2-SSTs-6H-61 | 5-1             | TTCTAAAGTGGCTCTAATCGACCAGCTGGTACTTTCCGCCGC    |
| U2-SSTs-6H-62 | 5-2             | CAGAAGGTGATAACTTCCAAGATAGCCCTCTACTATCAAGCA    |
| U2-SSTs-6H-63 | 5-3             | GCCTCGCCCTGTCTGACTCGTCTAAACATCCAACCTCCCTCCA   |
| U2-SSTs-6H-64 | 5-4             | CTGAAGCTCCCTCGACACGTGTCCAATACAGAAGTGTCCGCC    |
| U2-SSTs-6H-65 | 5-5             | CAGCGGAGTCTATATCTACGTATTAAAGGGCCTTTCATAGGG    |
| U2-SSTs-6H-66 | 5-6             | GACCCACTAAGTGGTTTCCGCATGAGGACCAAGCCTAGGTTT    |
| U2-SSTs-6H-67 | 5-7             | GACTGTGCTCCCTGGACCCGAATGCCCGCTCGCGCATCTCTG    |
| U2-SSTs-6H-68 | 5-8             | TGAGGTACAGCGTTCGTGTCACTACATGCTGTGCTGCTATAA    |
| U2-SSTs-6H-69 | 5-9             | GAGTAGCATTAGGCACAGCAGTAAACGACTTCCTCCACGGCC    |
| U2-SSTs-6H-70 | 5-10            | TGCTGCGTGCCTGCGTGTCTCTCCTCCTGCACCTGACTAATAA   |
| U2-SSTs-6H-71 | 5-11            | CGTTGGCAGCACTTCTACCTAGAAGCAAGTAATGAGTCTGCT    |
| U2-SSTs-6H-72 | 5-12            | AATTCTCGTGC GCGGGTGAGTCTCTAATTGCCATCGCTAAAT   |
| U2-SSTs-6H-73 | 5-13            | TGGTAGAAAGAAGGGAGGCTCTTCAGCGTAAGGGATACAATT    |
| U2-SSTs-6H-74 | 5-14            | GACCCAGGGTTAGTTCCGGAGTTCGTCTTTGGCTAAAGGCGC    |
| U2-SSTs-6H-75 | 5-15            | ACTTCGTGCTTGTTTTTTTTTTTTTTTTTTTTTTTTAAACGGTCT |
| U2-SSTs-6H-76 | 6-1             | TTTTTTTTTTTTTAGGTAGGCAGGCCACTTTAGAATTTTTTTTTT |
| U2-SSTs-6H-77 | 6-2             | TACAAACGTGTCCTTGTCTTTATCACCTTCTGTGATTAGA      |
| U2-SSTs-6H-78 | 6-3             | GTCCCTGGAGCGTTCGGAAAACAGGGCGAGGCCTTGGAAAGT    |
| U2-SSTs-6H-79 | 6-4             | GGTACGACACAGCGTGTCTGAGGGAGCTTCAGACGAGTCAG     |
| U2-SSTs-6H-80 | 6-5             | GTCCAGGTCTACTAAATTGTCTAGACTCCGCTGCACGTGTCTG   |
| U2-SSTs-6H-81 | 6-6             | GGCGTGGTACGTGCATCACCAACTTAGTGGGTCACGTAGATA    |
| U2-SSTs-6H-82 | 6-7             | AAGGGCAAAGCCATTGACGACGGGAGCACAGTCGCGGAAACC    |
| U2-SSTs-6H-83 | 6-8             | ACAACGGGTACTATAGTATCGCGCTGTACCTCATCGGGTCCA    |
| U2-SSTs-6H-84 | 6-9             | GTGGAAGCCCGTTCGGTGTCTCTAATGCTACTCTGACACGAA    |
| U2-SSTs-6H-85 | 6-10            | ACCTGGAACCGCCCGATAGGCACGACGCAGCACTGCTGTGC     |
| U2-SSTs-6H-86 | 6-11            | TCACGGTACCAGTCCGAGATGGTGCTGCCAACGAGAAGCACG    |
| U2-SSTs-6H-87 | 6-12            | TCTTTCGGTGC GGTCTCCGGCGCACGAGAATTTAGGTAGAA    |
| U2-SSTs-6H-88 | 6-13            | AGGGCACGCATAGCTGCCAGCTTCTTTCTACCAACTCACCCG    |
| U2-SSTs-6H-89 | 6-14            | CAGCAAAGCAATGGCTGAAATTAACCCTGGGTCGAGCCTCCC    |
| U2-SSTs-6H-90 | 6-15            | TTGCTCTACTATTATGTGCATCAAGCACGAAGTCTCCGGAAC    |

**U2-SSTs-4H**

| <b>Seq_ID</b> | <b>Location</b> | <b>Sequence</b>                                |
|---------------|-----------------|------------------------------------------------|
| U2-SSTs-4H-1  | 1-1             | CTGCTTATCCAGACCATTTCCACACGTTTGTACTGCCTACCT     |
| U2-SSTs-4H-2  | 1-2             | ACAGTCCCGTCTACGGGCCAGGCTCCAGGGACAAGGACAAGG     |
| U2-SSTs-4H-3  | 1-3             | GCGTGGTACGTAGCCGGAGCATGTGTGCTACCATTTTCGGAAC    |
| U2-SSTs-4H-4  | 1-4             | TGTATTTCTACAAC TTGTACGTAGACCTGGACCAGGACACGC    |
| U2-SSTs-4H-5  | 1-5             | CATGCATGTCTAACGTCGCGACGTACCACGCCGACAATTTAG     |
| U2-SSTs-4H-6  | 1-6             | GGTCTTCTACTGTAGGAGGACGCTTTGCCCTTTGGTGATGCA     |
| U2-SSTs-4H-7  | 1-7             | GCATCTTTCAGCGCTCAATCAGTACCCGTTGTGTGCTCAATG     |
| U2-SSTs-4H-8  | 1-8             | CCCTGAAACTCTACAGAGGGCCGGGCTTCCACCGATACTATA     |
| U2-SSTs-4H-9  | 1-9             | CATCTAGAAAAGGGCGTTGGGTGGTTTTCCAGGTAGACACCGAA   |
| U2-SSTs-4H-10 | 1-10            | ATCTTTGATCTGCGGGACATATGGTACCGTGACCTATCGGGC     |
| U2-SSTs-4H-11 | 1-11            | TGGTAGTTCCCTTCTTTTCGGCGGCACGGAAAGACATCTCCGAC   |
| U2-SSTs-4H-12 | 1-12            | GAACGAAGGTTTACTGTGACTATGCGTGCCCTCCGGACGACC     |
| U2-SSTs-4H-13 | 1-13            | TGGGACAAGACATATACACCTTTGCTTTGCTGGCTGGCAGCT     |
| U2-SSTs-4H-14 | 1-14            | GTTGCGACCACGCAAGATAGCTAGTAGAGCAAATTTTCAGCCA    |
| U2-SSTs-4H-15 | 1-15            | CTTTAAGCCGGATTTTTTTTTTTTTTTTTTTTTTTTATGCACATAA |
| U2-SSTs-4H-16 | 2-1             | TTTTTTTTTTTTTGCGGGCGAAACTGGATAAGCAGTTTTTTTTTTT |
| U2-SSTs-4H-17 | 2-2             | GTACCAGCTGGTGCTTGATAGAGACGGGACTGTGGAAATGGT     |
| U2-SSTs-4H-18 | 2-3             | TAGAGGGCTATTGGAGGGAGTTACGTACCACGCCTGGCCCGT     |
| U2-SSTs-4H-19 | 2-4             | TGGATGTTTTAGGGCGGACAGTTGTAGAAAATACATGCTCCGGC   |
| U2-SSTs-4H-20 | 2-5             | TCTGTATTGGACCCTATGAAATAGACATGCATGCGTACAAGT     |
| U2-SSTs-4H-21 | 2-6             | GGCCCTTTAATAAACCTAGGCCAGTAGAAGACCTCGCGACGT     |
| U2-SSTs-4H-22 | 2-7             | TTGGTCCTCATCAGAGATGCGGCTGAAAGATGCGTCCTCCTA     |
| U2-SSTs-4H-23 | 2-8             | CGAGCGGGCATTTATAGCGACAGAGTTTCAGGGTGATTGAGC     |
| U2-SSTs-4H-24 | 2-9             | AGCATGTAGTGGGCCGTGGAGCCTTTCTAGATGGCCCTCTGT     |
| U2-SSTs-4H-25 | 2-10            | GAAGTCGTTTTATTATTAGTCACAGATCAAAGATACCCAACGC    |
| U2-SSTs-4H-26 | 2-11            | GGTGCAGGAGGAGCAGACTCAAAGGAACTACCATATGTCCCG     |
| U2-SSTs-4H-27 | 2-12            | TTACTTGCTTCATTTAGCGATAAACCTTCGTTCCGCCGAAAG     |
| U2-SSTs-4H-28 | 2-13            | GGCAATTAGAGAATTTGTATCCTGTCTTGTCCCAAGTCACAGT    |
| U2-SSTs-4H-29 | 2-14            | CTTACGCTGAAGCGCCTTTAGCGTGGTCGCAACAGGTGTATA     |
| U2-SSTs-4H-30 | 2-15            | CCAAAGACGAAAGACCGTTTATCCGGCTTAAAGGCTATCTTG     |
| U2-SSTs-4H-31 | 3-1             | TTCTAAAGTGGCTCTAATCGACCAGCTGGTACTTTTCGCCC GC   |
| U2-SSTs-4H-32 | 3-2             | CAGAAGGTGATAACTTCCAAGATAGCCCTCTACTATCAAGCA     |
| U2-SSTs-4H-33 | 3-3             | GCCTCGCCCTGTCTGACTCGTCTAAACATCCAACCTCCCTCCA    |
| U2-SSTs-4H-34 | 3-4             | CTGAAGCTCCCTCGACACGTGTCCAATACAGA ACTGTCCGCC    |
| U2-SSTs-4H-35 | 3-5             | CAGCGGAGTCTATATCTACGTATTAAGGGCCTTTCATAGGG      |
| U2-SSTs-4H-36 | 3-6             | GACCCACTAAGTGGTTTTCCGCATGAGGACCAAGCCTAGGTTT    |
| U2-SSTs-4H-37 | 3-7             | GACTGTGCTCCCTGGACCCGAATGCCCGCTCGCGCATCTCTG     |
| U2-SSTs-4H-38 | 3-8             | TGAGGTACAGCGTTCGTGTCACACTACATGCTGTGCTATAAA     |
| U2-SSTs-4H-39 | 3-9             | GAGTAGCATTAGGCACAGCAGTAAACGACTTCCTCCACGGCC     |
| U2-SSTs-4H-40 | 3-10            | TGCTGCGTTCGTGCGTCTTCTCCTCCTGCACCTGACTAATAA     |
| U2-SSTs-4H-41 | 3-11            | CGTTGGCAGCACTTCTACCTAGAAGCAAGTAATGAGTCTGCT     |
| U2-SSTs-4H-42 | 3-12            | AATTCTCGTGC GCGGGTGAGTCTCTAATTGCCATCGCTAAAT    |
| U2-SSTs-4H-43 | 3-13            | TGGTAGAAAAGAAGGGAGGCTTTCAGCGTAAGGGATACAATT     |
| U2-SSTs-4H-44 | 3-14            | GACCCAGGGTTAGTTCCGGAGTTCGTCTTTGGCTAAAGGCGC     |
| U2-SSTs-4H-45 | 3-15            | ACTTCGTGCTTGTTTTTTTTTTTTTTTTTTTTTTTTAAACGGTCT  |
| U2-SSTs-4H-46 | 4-1             | TTTTTTTTTTTTTAGGTAGGCAGGCCACTTTAGAATTTTTTTTTT  |

| <b>Seq_ID</b> | <b>Location</b> | <b>Sequence</b>                             |
|---------------|-----------------|---------------------------------------------|
| U2-SSTs-4H-47 | 4-2             | TACAAACGTGTCCTTGTCCCTTATCACCTTCTGTCGATTAGA  |
| U2-SSTs-4H-48 | 4-3             | GTCCCTGGAGCGTTCCGAAATACAGGGCGAGGCCTTGGAAGT  |
| U2-SSTs-4H-49 | 4-4             | GGTACGACACAGCGTGTCCCTGAGGGAGCTTCAGACGAGTCAG |
| U2-SSTs-4H-50 | 4-5             | GTCCAGGTCTACTAAATTGTCTAGACTCCGCTGCACGTGTCG  |
| U2-SSTs-4H-51 | 4-6             | GGCGTGGTACGTGCATCACCAACTTAGTGGGTCACGTAGATA  |
| U2-SSTs-4H-52 | 4-7             | AAGGGCAAAGCCATTGACGACGGGAGCACAGTCGCGGAAACC  |
| U2-SSTs-4H-53 | 4-8             | ACAACGGGTACTATAGTATCGCGCTGTACCTCATCGGGTCCA  |
| U2-SSTs-4H-54 | 4-9             | GTGGAAGCCCGTTCGGTGTCTCTAATGCTACTCTGACACGAA  |
| U2-SSTs-4H-55 | 4-10            | ACCTGGAAACCGCCCGATAGGCACGACGCAGCACTGCTGTGC  |
| U2-SSTs-4H-56 | 4-11            | TCACGGTACCAGTCGGAGATGGTGCTGCCAACGAGAAGCACG  |
| U2-SSTs-4H-57 | 4-12            | TCTTTCCGTGCGGTCGTCCGGCGCACGAGAATTTAGGTAGAA  |
| U2-SSTs-4H-58 | 4-13            | AGGGCACGCATAGCTGCCAGCTTCTTTCTACCAACTCACCCG  |
| U2-SSTs-4H-59 | 4-14            | CAGCAAAGCAATGGCTGAAATTAACCCTGGGTCGAGCCTCCC  |
| U2-SSTs-4H-60 | 4-15            | TTGCTCTACTATTATGTGCATCAAGCACGAAGTCTCCGGAAC  |



**U2-SSTs-2H**

| <b>Seq_ID</b> | <b>Location</b> | <b>Sequence</b>                                |
|---------------|-----------------|------------------------------------------------|
| U1-SSTs-2H-1  | 1-1             | TTCTAAAGTGGCTCTAATCGAACACGTTTGTACTGCCTACCT     |
| U1-SSTs-2H-2  | 1-2             | CAGAAGGTGATAACTTCCAAGGCTCCAGGGACAAGGACAAGG     |
| U1-SSTs-2H-3  | 1-3             | GCCTCGCCCTGTCTGACTCGTTGTGTGCGTACCATTTCCGGAAC   |
| U1-SSTs-2H-4  | 1-4             | CTGAAGCTCCCTCGACACGTGTAGACCTGGACCAGGACACGC     |
| U1-SSTs-2H-5  | 1-5             | CAGCGGAGTCTATATCTACGTCGTACCACGCCGACAATTTAG     |
| U1-SSTs-2H-6  | 1-6             | GACCCACTAAGTGGTTTCCGCGCTTTGCCCTTTGGTGATGCA     |
| U1-SSTs-2H-7  | 1-7             | GACTGTGCTCCCTGGACCCGAGTACCCGTTGTGTGCGTCAATG    |
| U1-SSTs-2H-8  | 1-8             | TGAGGTACAGCGTTCGTGTCACGGGCTTCCACCGATACTATA     |
| U1-SSTs-2H-9  | 1-9             | GAGTAGCATTAGGCACAGCAGGGTTTCCAGGTAGACACCGAA     |
| U1-SSTs-2H-10 | 1-10            | TGCTGCGTTCGTGCGTGCTTCTTGGTACCGTGACCTATCGGGC    |
| U1-SSTs-2H-11 | 1-11            | CGTTGGCAGCAGCTTCTACCTAGCACGGAAAGACATCTCCGAC    |
| U1-SSTs-2H-12 | 1-12            | AATTCTCGTGC GCGGGTGAGTATGCGTGCCCTCCGGACGACC    |
| U1-SSTs-2H-13 | 1-13            | TGGTAGAAAGAAGGGAGGCTCTTGCTTTGCTGGCTGGCAGCT     |
| U1-SSTs-2H-14 | 1-14            | GACCCAGGGTTAGTTCCGGAGTAGTAGAGCAAATTTTCAGCCA    |
| U1-SSTs-2H-15 | 1-15            | ACTTCGTGCTTGTTTTTTTTTTTTTTTTTTTTTTTTATGCACATAA |
| U1-SSTs-2H-16 | 2-1             | TTTTTTTTTTTTTAGGTAGGCAGGCCACTTTAGAATTTTTTTTTTT |
| U1-SSTs-2H-17 | 2-2             | TACAAACGTGTCCTTGTCTTTATCACCTTCTGTGCGATTAGA     |
| U1-SSTs-2H-18 | 2-3             | GTCCCTGGAGCGTTCGGAAATACAGGGCGAGGCCTTGGAAGT     |
| U1-SSTs-2H-19 | 2-4             | GGTACGACACAGCGTGTCTGAGGGAGCTTCAGACGAGTCAG      |
| U1-SSTs-2H-20 | 2-5             | GTCCAGGTCTACTAAATTGTCTAGACTCCGCTGCACGTGTTCG    |
| U1-SSTs-2H-21 | 2-6             | GGCGTGGTACGTGCATCACCAACTTAGTGGGTACGTCAGATA     |
| U1-SSTs-2H-22 | 2-7             | AAGGGCAAAGCCATTGACGACGGGAGCACAGTCGCGGAAACC     |
| U1-SSTs-2H-23 | 2-8             | ACAACGGGTACTATAGTATCGCGCTGTACCTCATCGGGTCCA     |
| U1-SSTs-2H-24 | 2-9             | GTGGAAGCCCGTTCGGTGTCTCTAATGCTACTCTGACACGAA     |
| U1-SSTs-2H-25 | 2-10            | ACCTGGAAACCGCCCGATAGGCACGACGCAGCACTGCTGTGC     |
| U1-SSTs-2H-26 | 2-11            | TCACGGTACCAGTCGGAGATGGTGCTGCCAACGAGAAGCACG     |
| U1-SSTs-2H-27 | 2-12            | TCTTTCCGTGCGGTTCGTCGCGGCACGAGAATTTAGGTAGAA     |
| U1-SSTs-2H-28 | 2-13            | AGGGCACGCATAGCTGCCAGCTTCTTTCTACCAACTCACCCG     |
| U1-SSTs-2H-29 | 2-14            | CAGCAAAGCAATGGCTGAAATTAACCCTGGGTGAGCCTCCC      |
| U1-SSTs-2H-30 | 2-15            | TTGCTCTACTATTATGTGCATCAAGCACGAAGTCTCCGGAAC     |
